# Supplementary material for: Artemether, Artesunate, Arteannuin B, Echinatin, Licochalcone B and Andrographolide Effectively Inhibit SARS-CoV-2 and Related Viruses In Vitro
Source: Front Cell Infect Microbiol. 2021 Aug 30;11:680127. doi: 10.3389/fcimb.2021.680127 (PMC8435859; doi:10.3389/fcimb.2021.680127)
Supplement: Supplementary file 2 [file Table_2.xlsx]

## Sheet: M26712
ID	Name	Synonyms	Chinese Name	Source	方剂来源	CAS	Category	SMILES	Formula	MolWt	Pathways	Target	Receptor	Bioactivity	Reference
T6S1529	1,5-Dicaffeoylquinic acid	Cynarine	洋蓟素	金银花	连花清瘟胶囊；热毒宁注射液；痰热清注射液；透解祛瘟颗粒；透解祛瘟颗粒；金花清感颗粒	30964-13-7	Phenolic Acids	O[C@@H]1C[C@](C[C@@H](OC(=O)\C=C\c2ccc(O)c(O)c2)[C@H]1O)(OC(=O)\C=C\c1ccc(O)c(O)c1)C(O)=O	C25H24O12	516.45	Immunology/Inflammation;oxidation-reduction	Antiviral; Antioxidant	Antiviral;Antioxidant	1,5-Dicaffeoylquinic acid has neuroprotective, and antioxidant effects, it can inhibition of GSK3β as well as the modulation of Bcl-2/Bax.	Cao X, et al. 1, 5-Dicaffeoylquinic acid-mediated glutathione synthesis through activation of Nrf2 protects against OGD/reperfusion-induced oxidative stress in astrocytes.Brain Res. 2010 Aug 6;1347:142-8
T2737	Neohesperidin	Hesperetin 7-O-neohesperidoside;NSC 31048	新橙皮苷	枳实	清肺排毒汤	13241-33-3	Flavonoid	COc1ccc(cc1O)[C@@H]1CC(=O)c2c(O)cc(O[C@@H]3O[C@H](CO)[C@@H](O)[C@H](O)[C@H]3O[C@@H]3O[C@@H](C)[C@H](O)[C@@H](O)[C@H]3O)cc2O1	C28H34O15	610.56	Others	Others inhibitor	Others	Neohesperidin with antioxidant and neuroprotective properties. Unlike other citrus flavanones, it does not inhibit oral carcinogenesis in a rat model.	Lee JH, et al. Phytother Res, 2009, 23(12), 1748-1753.
T3012	Mangiferin	Alpizarin;Chinomin;Hedysarid	芒果苷	红花	血必净注射液	4773-96-0	Glycosides	c1c2c(cc(c1O)O)oc1cc(c(c(c1c2=O)O)[C@H]1[C@@H]([C@H]([C@@H]([C@H](O1)CO)O)O)O)O	C19H18O11	422.35	Immunology/Inflammation;NF-κB	Nrf2;NF-κB	Nrf2;p50;p65	Mangiferin is used for antidiabetes. Extracted from Mangifera indica L..	Miura T, et al. Phytomedicine. 2001 Mar;8 (2):85-7.
T4S0647	Butylphthalide	3-Butylphthalide;3-n-Butylphthalide;3-n-Butylphathlide	丁基苯酞	川芎	血必净注射液	6066-49-5	Miscellaneous	CCCCC1OC(=O)c2ccccc12	C12H14O2	190.24	Others	Others	Others	Butylphthalide is an anti-cerebral-ischemia drug; first isolated from the seeds of Apium graveolens Linn.	Zhao W, et al. 3-N-butylphthalide improves neuronal morphology after chronic cerebral ischemia. Neural Regen Res. 2014 Apr 1;9(7):719-26.
T0722	Ursolic acid	Malol;Urson;Prunol;NSC 167406;NSC-4060	熊果酸	丹参	血必净注射液	77-52-1	Terpenoids	C[C@@H]1CC[C@@]2(CC[C@]3(C)C(=CC[C@@H]4[C@@]5(C)CC[C@H](O)C(C)(C)[C@@H]5CC[C@@]34C)[C@@H]2[C@H]1C)C(O)=O	C30H48O3	456.7	Autophagy	Autophagy	Autophagy	Ursolic acid(Bungeolic acid), a natural pentacyclic triterpenoid carboxylic acid, shows anti-tumor effects.	Liu J, et al. J Ethnopharmacol, 1995, 49(2):57-68.
T1738	Taxifolin	(+)-Taxifolin;(+)-Dihydroquercetin;Dihydroquercetin	紫杉叶素	红花	血必净注射液	480-18-2	Flavonoid	Oc1ccc(cc1O)[C@@H]1[C@@H](O)C(=O)c2c(O)cc(O)cc2O1	C15H12O7	304.25	GPCR/G Protein; Angiogenesis; Apoptosis; Proteases/Proteasome; Tyrosine Kinase/Adaptors	Adrenergic Receptor antagonist; TNF inhibitor; Tyrosinase inhibitor; VEGFR inhibitor	β-adrenergic receptor; TNF-α; Collagenase Tyrosinase; Beta-nerve growth factor; VEGFR2	Taxifolin is a flavonoid in many plants such as Taxus chinensis, Siberian larch, Cedrus deodara and so on.	Makena PS, et al. Environ Mol Mutagen, 2009, 50(6), 451-459.
T1027	Luteolin	Digitoflavone;Luteoline;Luteolol;Flacitran	木犀草素	桔梗	生脉注射液	491-70-3	Flavonoid	Oc1cc(O)c2c(=O)cc(oc2c1)c1cc(O)c(O)cc1	C15H10O6	286.24	Metabolism	PDE inhibitor	PDE1; PDE2; PDE3; PDE4; PDE5	Luteolin is a naturally occurring flavonoid. The flavonoids are polyphenolic compounds found as integral components of the human diet. In vitro work has concentrated on the direct and indirect actions of flavonoids on tumor cells, and has found a variety of anticancer effects such as cell growth and kinase activity inhibition, apoptosis induction, suppression of the secretion of matrix metallopro…	Yu MC, et al. Eur J Pharmacol, 2010, 627(1-3), 269-275.
T2967	Stigmasterol	Stigmasterin;beta-Stigmasterol	豆甾醇	丹参	血必净注射液	83-48-7	Steroids	CC[C@@H](C(C)C)\C=C\[C@@H](C)[C@H]1CC[C@H]2[C@@H]3CC=C4C[C@@H](O)CC[C@]4(C)[C@H]3CC[C@]12C	C29H48O	412.69	Proteases/Proteasome	MMP	MMP	Stigmasterol is found in the fats and oils of soybean, calabar bean and rape seed, as well as several other vegetables, legumes, nuts, seeds, and unpasteurized milk. Stigmasterol has been focused on the cholesterol-lowering activity and is valued as an anti-stiffness factor in the therapy of rheumatic diseases.	Kim YS, et al. BMB Rep. 2014 Aug;47(8):433-8.
T2177	Kaempferol	Kempferol;Robigenin	山柰酚	青蒿	热毒宁注射液；透解祛瘟颗粒；金花清感颗粒	520-18-3	Flavonoid	Oc1ccc(cc1)c1c(O)c(=O)c2c(O)cc(O)cc2o1	C15H10O6	286.23	Endocrinology/Hormones	Estrogen/progestogen Receptor antagonist	ER	Kaempferol is a natural flavonoid which has been isolated from Delphinium, Witch-hazel, grapefruit, and other plant sources.	Luo H, et al. Kaempferol nanoparticles achieve strong and selective inhibition of ovarian cancer cell viability. Int J Nanomedicine. 2012; 7: 3951-3959.
T3S1534	Secoxyloganin		幼枝含断氧化马钱子甙	金银花	连花清瘟胶囊；热毒宁注射液；痰热清注射液；透解祛瘟颗粒；透解祛瘟颗粒；金花清感颗粒	58822-47-2	Others	COC(=O)C1=CO[C@@H](O[C@@H]2O[C@H](CO)[C@@H](O)[C@H](O)[C@H]2O)[C@H](C=C)[C@@H]1CC(O)=O	C17H24O11	404.36	Microbiology&virology	Antifection	Antifection	Secoxyloganin possesses a hepato-protective effect. Secoxyloganin possesses antibacterial activity. Secoxyloganin has cytotoxic activity against UACC-62 cell line.Secoxyloganin possesses the perfect protective effect on PRRSV infected cell and with the minimum protection concentration of 6. 25 μg/mL.	Liu HQ, Wang TL.[Chemical constituents from flower of Lonicera fragrantissima].Zhong Yao Cai. 2014 Aug;37(8):1383-5.
T3793	(20R)-Ginsenoside Rh1	20(R)-Ginsenoside Rh1	人参皂苷 R-RH1	人参	小柴胡汤	80952-71-2	Triterpenoids	C\C(C)=C/CC[C@@](C)(O)[C@H]1CC[C@]2(C)[C@@H]1[C@H](O)C[C@@H]1[C@@]3(C)CC[C@H](O)C(C)(C)[C@@H]3[C@H](C[C@@]21C)O[C@@H]1O[C@H](CO)[C@@H](O)[C@H](O)[C@H]1O	C36H62O9	638.9	Others	Others inhibitor	Others	20S, 20R ginsenoside-Rh1 can inhibit the thrombin-induced conversion of fibrinogen to fibrin.	Yu HS,et al. [Chemical constituents from processed rhizomes of Panax notoginseng]. Zhongguo Zhong Yao Za Zhi. 2013 Nov;38(22):3910-7.
T3674	Hydroxysafflor yellow A	HSYA;Safflomin A	羟基红花黄色素A	红花	血必净注射液	78281-02-4	Chalcones	OC[C@H]1O[C@H]([C@H](O)[C@@H](O)[C@@H]1O)C1=C(O)C(O)([C@@H]2O[C@H](CO)[C@@H](O)[C@H](O)[C@H]2O)C(O)=C(C(=O)\C=C\c2ccc(O)cc2)C1=O	C27H32O16	612.53	Stem Cells	TGF-beta/Smad inhibitor	TGFβ	Hydroxysafflor yellow A inhibited adipogenesis by increasing HSL promoter activities. Hydroxysafflor yellow A can effectively protect the liver from long-term alcohol injury by enhancing antioxidant capacity and inhibiting the expression of TGF-β. It prevents steroid-induced avascular necrosis of femoral head by inhibiting primary bone marrow-derived mesenchymal stromal cells. Also, Hydroxysafflo…	Zhu HJ, et al. Cytotechnology. 2015 Oct;67(5):885-92.
T2961	Notoginsenoside R1	Sanqi glucoside R1;Sanchinoside R1	三七皂苷R1	人参	小柴胡汤	80418-24-2	Glycosides	[C@@H]1([C@@H]([C@H]([C@@H]([C@H](O1)CO)O)O)O)O[C@@](C)(CCC=C(C)C)[C@H]1CC[C@]2([C@@]3(C[C@@H]([C@H]4C([C@H](CC[C@@]4([C@H]3C[C@H]([C@H]12)O)C)O)(C)C)O[C@H]1[C@@H]([C@H]([C@@H]([C@H](O1)CO)O)O)O[C@H]1[C@@H]([C@H]([C@@H](CO1)O)O)O)C)C	C47H80O18	933.13	MAPK	ERK inhibitor	ERK1; ERK2	Notoginsenoside R1 has been shown to exhibit antioxidant, antiapoptotic, anti-inflammatory, and immune-stimulatory properties.	Xu Y, et al. Am J Chin Med. 2014;42(4):799-816.
T3892	Isoacteoside	Isoverbascoside	异麦角甾苷	竹叶	银翘散	61303-13-7	Phenylpropanoids	C(=O)(/C=C/c1cc(c(cc1)O)O)OC[C@H]1O[C@H]([C@@H]([C@H]([C@@H]1O)O[C@@H]1O[C@H]([C@@H]([C@H]([C@H]1O)O)O)C)O)OCCc1cc(c(cc1)O)O	C29H36O15	624.59	NF-Κb	NF-κB inhibitor	NF-κB	Isoacteoside has the anti-inflammatory effect, mediated by action on caspase-1, mitogen-activated protein kinases (c-Jun N-terminal kinase, p38, extracellular signal-regulated protein kinase) and nuclear factor-kappa B pathways.	Nam SY,et al. Anti-inflammatory effects of isoacteoside from Abeliophyllum distichum. Immunopharmacol Immunotoxicol. 2015 Jun;37(3):258-64.
T1035	Hesperidin	Hesperetin 7-rutinoside;Cirantin	橙皮甙	陈皮	清肺达原颗粒（肺炎1号）；清肺排毒汤；透解祛瘟颗粒	520-26-3	Glycosides	[C@H]1(CC(=O)c2c(O1)cc(cc2O)O[C@@H]1O[C@H](CO[C@H]2[C@@H]([C@@H]([C@H]([C@@H](O2)C)O)O)O)[C@H]([C@@H]([C@H]1O)O)O)c1cc(c(cc1)OC)O	C28H34O15	610.56	Autophagy	Autophagy	Autophagy	Hesperidin is a flavanone glycoside found in citrus fruits with antioxidant, anti-inflammatory, anti-carcinogenic, and antihypertensive and lipid-lowering activity.	Inderjit, Dakshini KM. J Chem Ecol. 1991 Aug;17(8):1585-91.
T2806	Lappaconitine	(+)-Lappaconitine	高乌甲素	附子	参附注射液	32854-75-4	Alkaloids	CCN1C[C@@]2(CC[C@H](OC)[C@@]34[C@@H]5C[C@H]6[C@H](OC)[C@]5(O)[C@](O)(C[C@@H]6OC)[C@@H](C[C@H]23)C14)OC(=O)c1ccccc1NC(C)=O	C32H44N2O8	584.64	Membrane transporter/Ion channel	Sodium Channel	Sodium Channel	Lappaconitine, isolated from Aconitum sinomontanum Nakai, was characterized as an analgesic.	Bryzgalov AO, et al. Cardiovasc Hematol Agents Med Chem. 2013 Sep;11(3):211-7.
T2916	Patchouli alcohol	(-)-Patchouli Alcohol;Patchoulol;Patchouli camphor	广藿香醇	广藿香	连花清瘟胶囊	5986-55-0	Sesquiterpenoids	C[C@H]1CC[C@@]2(O)C(C)(C)[C@@H]3CC[C@@]2(C)[C@H]1C3	C15H26O	222.2	Immunology/Inflammation	Others	Others	Patchouli alcohol is a sesquiterpene alcohol found in patchouli oil. It has antibacterial, antifungal, and antiviral actions. Patchouli alcohol also suppresses inflammation induced by lipopolysaccharide in vivo. Topical application of patchouli alcohol accelerates recovery from ultraviolet irradiation-induced skin damage through antioxidant and anti-inflammatory effects.	Yu JL, et al. J Surg Res. 2015 Apr;194(2):537-43.
T2810	(20S)-Protopanaxatriol	g-PPT;20(S)-APPT	原人参三醇	人参	小柴胡汤	34080-08-5	Terpenoids	C\C(C)=C/CC[C@](C)(O)[C@H]1CC[C@]2(C)[C@@H]1[C@H](O)C[C@@H]1[C@@]3(C)CC[C@H](O)C(C)(C)[C@@H]3[C@@H](O)C[C@@]21C	C30H52O4	476.73	Endocrinology/Hormones; Others	Estrogen/progestogen Receptor; Glucocorticoid Receptor; Liver X Receptor	ER; Glucocorticoid Receptor; LXR	(20S)-Protopanaxatriol(g-PPT), a metabolite of ginsenoside, could regulate endothelial cell functions through the estrogen receptor and glucocorticoid receptor.	Zhang Y, et al. Sci Rep. 2014 Dec 9;4:7375.
T3885	ROSIRIDIN	(-)-Rosiridin ;6'-O-Deacetylrosiridoside C	化合物ROSIRIDIN	红景天	连花清瘟胶囊	100462-37-1	Monoterpenoids	C\C(C)=C\C[C@H](O)C(\C)=C\CO[C@@H]1O[C@H](CO)[C@@H](O)[C@H](O)[C@H]1O	C16H28O7	332.39	Others	Others	Others	Rosiridin has cardioprotective activity.	Gui-Zhi M A , Dian-Jia S , Jun L I . The determination of rosiridin in effect extracts of anti-coronary atherosclerotic heart disease of Rhodiola rosea by HPLC[J]. Journal of Xinjiang Medical University, 2007.
T2997	Rheic Acid	Monorhein;Rhubarb yellow;Rhein;NSC 38629;Rheinic Acid	大黄酸	大黄	连花清瘟胶囊	478-43-3	Quinones	OC(=O)c1cc(O)c2C(=O)c3c(cccc3O)C(=O)c2c1	C15H8O6	284.22	Autophagy	Autophagy	Autophagy	Rhein is an anthraquinone compound extracted from Polygonaceae Rheum Officinale with anti-inflammation and antitumor activities.	Martel-Pelletier J, et al. J Rheumatol, 1998, 25(4), 753-762.
T0036	Enoxolone	18β-Glycyrrhetinic acid;Glycyrrhetin	甘草次酸	甘草	连花清瘟胶囊；小柴胡汤	471-53-4	Terpenoids	CC1(C)[C@@H](O)CC[C@@]2(C)[C@H]1CC[C@]1(C)[C@@H]2C(=O)C=C2[C@@H]3C[C@](C)(CC[C@]3(C)CC[C@@]12C)C(O)=O	C30H46O4	470.68	Metabolism	Dehydrogenase	Dehydrogenase	Enoxolone is the major bioactive component of Glycyrrhizae Radix and possesses anti-ulcerative, anti-inflammatory and antiproliferative properties.	Boldt J, et al. Expert Opin PharmacOthers. 2007, 8(13):2135-47.
T2906	Tanshinone IIA	Dan Shen ketone;Tanshinone B	丹参酮IIA	丹参	血必净注射液	568-72-9	Ketone	Cc1coc-2c1C(=O)C(=O)c1c-2ccc2c1CCCC2(C)C	C19H18O3	294.35	Angiogenesis; Tyrosine Kinase/Adaptors	VEGFR antagonist	VEGFR2	Tanshinone IIA(Tanshinone B) is the diterpene quinone in Danshen, which is utilized in the treatment of cardiovascular and inflammatory.	Fu J, et al. Eur J Pharmacol, 2007, 568(1-3), 213-221.
T2775	Baicalin	Baicalein 7-O-β-D-glucuronide	黄岑苷	丹参	血必净注射液	21967-41-9	Flavonoid	c1ccc(cc1)c1cc(=O)c2c(c(c(cc2o1)O[C@H]1[C@@H]([C@H]([C@@H]([C@H](O1)C(=O)O)O)O)O)O)O	C21H18O11	446.37	Membrane transporter/Ion channel; Neuroscience	GABA Receptor agonist	GABAR	Baicalin is a prolyl endopeptidase inhibitor isolated from scutellaria baicalensis, with antioxidant, anti-tumor, anti-HIV properties.	Chen JG, et al. J Steroid Biochem Mol Biol. 2015 May;149:11-6.
T0392	Artemisinin	NSC 369397;Qinghaosu;Qinghaosu,Artemisinine;Artemisinine	青蒿素	青蒿	热毒宁注射液；透解祛瘟颗粒；金花清感颗粒	63968-64-9	Ketone	C[C@@H]1CC[C@H]2[C@@H](C)C(=O)O[C@@H]3O[C@@]4(C)CC[C@@H]1[C@@]23OO4	C15H22O5	282.33	Microbiology&Virology	HCV Protease; Parasite	HCV; Parasite	Artemisinin is an ancient Chinese herbal therapy for malarial fevers which has been recently found to have potent activity against many forms of malarial organisms, including chloroquine-resistant Plasmodium falciparum.	Meshnick SR, et al. Mol Biochem Parasitol,1991, 49(2), 181-189.
T0724	Formononetin	Flavosil;Formononetol;Biochanin B	刺芒柄花素	黄芪	透解祛瘟颗粒	485-72-3	Flavonoid	COc1ccc(cc1)c1coc2c(ccc(O)c2)c1=O	C16H12O4	268.27	Tyrosine Kinase/Adaptors	FGFR	FGFR	Formononetin is an O-methylated isoflavone and a phytoestrogen from the root of Astragalus membranaceus.	Liu XJ, et al. Asian Pac J Y Prev. 2014;15(6):2835-9.
T0610	Piceatannol	trans-Piceatannol;Astringenin	白皮杉醇	大黄	连花清瘟胶囊	10083-24-6	Alcohols	Oc1cc(/C=C/c2cc(O)c(O)cc2)cc(O)c1	C14H12O4	244.24	Apoptosis; Cytoskeletal Signaling; GPCR/G Protein	PKA inhibitor; PKC inhibitor; Serine/threonin kinase inhibitor	cAK; PKC; MLCK	Piceatannol is an anti-inflammatory, immunomodulatory and antiproliferative agent. It inhibits p56lck and syk protein tyrosine kinases and inhibits NF-κB activation and gene expression of TNF-induced. It is synthetic from the conversion of resveratrol by cytochrome P450 1B1.	Oliver JM, et al. J Biol Chem, 1994, 269(47), 29697-29703.
T2143	Bergapten	5-Methoxypsoralen	香柑内酯	当归	血必净注射液	484-20-8	Phenylpropanoids	COc1c2ccc(=O)oc2cc2c1cco2	C12H8O4	216.19	Metabolism	P450 inhibitor	CYP	Bergapten, a psoralen, inhibits cell replication.	Panno ML, et al. Breast Cancer Res Treat, 2012, 136(2), 443-455.
T5S0620	Dehydrotrametenolic acid		松苓新酸	茯苓	清肺排毒汤	29220-16-4	Triterpenoids	C\C(C)=C/CC[C@H]([C@H]1CC[C@@]2(C)C3=CC[C@H]4C(C)(C)[C@@H](O)CC[C@]4(C)C3=CC[C@]12C)C(O)=O	C30H46O3	454.69	Others	Others	Others	1. Dehydrotrametenolic acid can be a potential anticancer agent against H-ras transformed tumor. 2. Dehydrotrametenolic acid is a promising candidate for a new type of insulin-sensitizing drug.	Kang H M , Lee S K , Shin D S , et al. Dehydrotrametenolic acid selectively inhibits the growth of H-ras transformed rat2 cells and induces apoptosis through caspase-3 pathway[J]. Life Sciences, 2006, 78(6):0-613.
T2212	Geniposide		京尼平甙	栀子	热毒宁注射液；醒脑静注射液	24512-63-8	Glycosides	COC(=O)C1=CO[C@@H](O[C@@H]2O[C@H](CO)[C@@H](O)[C@H](O)[C@H]2O)[C@H]2[C@@H]1CC=C2CO	C17H24O10	388.37	Neuroscience	Beta Amyloid	Amyloid-β	Geniposide is an iridoid glycoside with a variety of biological activities including neuroprotective, anti-diabetic, antiproliferative, and antioxidative activity. Geniposide has been shown to regulate Nrf2 translocation.	Liu H, et al. Fructus Gardenia (Gardenia jasminoides J. Ellis) phytochemistry, pharmacology ofcardiovascular, and safety with the perspective of new drugs development. J Asian Nat Prod Res. 2013;15(1):94-110.
T6688	Synephrine HCl	Oxedrine hydrochloride;Synephrine hydrochloride	辛弗林盐酸盐	枳实	清肺排毒汤	5985-28-4	Others	C(c1ccc(cc1)O)(CNC)O.Cl	C9H13NO2·HCl	203.67	GPCR/G Protein	Adrenergic Receptor agonist	α-adrenergic receptor	SynephrineHCl (Oxedrine, p-Synephrine) is an agonist that acts on sympathomimetic α-adrenergic receptor (AR).	Huang YT, et al. Jpn J Pharmacol, 2001, 85(2), 183-188.
T2957	Arctigenin	(-)-Arctigenin	牛蒡苷元	牛蒡子	银翘散；金花清感颗粒	7770-78-7	Glycosides	c1c(cc(c(c1)O)OC)C[C@@H]1[C@H](COC1=O)Cc1cc(c(cc1)OC)OC	C21H24O6	372.41	Autophagy; Proteases/Proteasome	Autophagy; MMP	Autophagy; MMP	(-)-Arctigenin is found in burdock. (-)-Arctigenin is isolated from Cnicus benedictus, Forsythia viridissima, Arctium lappa, Ipomoea cairica and others (CCD). Arctigenin is a lignan found in certain plants of the Asteraceae, including the Greater burdock (Arctium lappa) and Saussurea heteromalla. It has shown antiviral and anticancer effects. It is the aglycone of arctiin.	Wu X, et al. Biochem Pharmacol. 2015 Aug 15;96(4):323-36.
T0725	Isoliquiritigenin	ISL;Isoliquiritigen;GU17	异甘草素	甘草	连花清瘟胶囊；小柴胡汤	961-29-5	Ketone	C(=O)(/C=C/c1ccc(cc1)O)c1c(cc(cc1)O)O	C15H12O4	256.25	Endocrinology/Hormones; Enzyme	Reductase inhibitor	Aldose reductase	Isoliquiritigenin, an anti-tumor flavonoid from the root of Glycyrrhiza glabra, suppresses aldose reductase (IC50=320 nM).	Aida K, et al. Planta Med, 1990, 56(3), 254-258.
T3000	Magnolol	NSC 293099;5,5'-Diallyl-2,2'-biphenyldiol	厚朴酚	厚朴	清肺达原颗粒（肺炎1号）	528-43-8	Phenylpropanoids	Oc1c(cc(CC=C)cc1)c1c(O)ccc(CC=C)c1	C18H18O2	266.32	Apoptosis;Metabolism;NF-Κb	NF-κB inhibitor;p53 activator;PPAR inhibitor;Retinoid Receptor	NF-κB; p53; PPARγ;RXRα	Magnolol is a dual agonist of RXRα( EC50=10.4 μM) and PPARγ(EC50=17.7 μM). It blocks TNF-α-induced NF-KB activation.	Ai J, et al. Pharmacology, 2001, 63(1), 34-41.
T3001	Honokiol	NSC 293100	和厚朴酚	厚朴	清肺达原颗粒（肺炎1号）	35354-74-6	Phenols	C=CCc1cc(c(cc1)O)c1cc(c(cc1)O)CC=C	C18H18O2	266.32	Cytoskeletal Signaling; MAPK; PI3K/Akt/mTOR signaling	Akt inhibitor; MEK inhibitor	P-Akt; MEK	Honokiol is the active principle of magnolia extract. It inhibits the activation of Akt and enhances the phosphorylation of ERK1/ERK2.	Bai X, et al. J Biol Chem, 2003, 278(37), 35501-35507.
T0795	Rutin	Quercetin 3-O-rutinoside;Rutoside	芦丁	红花	血必净注射液	153-18-4	Flavonoid	Oc1ccc(cc1O)c1oc2cc(O)cc(O)c2c(=O)c1O[C@@H]1O[C@H](CO[C@@H]2O[C@@H](C)[C@H](O)[C@@H](O)[C@H]2O)[C@@H](O)[C@H](O)[C@H]1O	C27H30O16	610.52	GPCR/G Protein	Prostaglandin Receptor inhibitor	AKR	Rutin, a flavonoid, has a variety of biological activities including antiallergic, anti-inflammatory, antiproliferative, and anticarcinogenic properties.	Navarro-Nunez L, et al. J Agric Food Chem, 2008, 56(9), 2970-2976.
T2761	Naringin dihydrochalcone	Naringin DC	柚皮甙二氢查尔酮	枳实	清肺排毒汤	18916-17-1	Glycosides	C[C@H]1[C@@H]([C@H]([C@H]([C@@H](O1)O[C@@H]1[C@H]([C@@H]([C@H](O[C@H]1Oc1cc(c(c(c1)O)C(=O)CCc1ccc(cc1)O)O)CO)O)O)O)O)O	C27H34O14	582.55	Metabolism	P450	CYP	Naringin Dihydrochalcone(Naringin DC) is an inhibitor of CYP enzymes, used as an artificial sweetener.	Shin W, et al. J Med Chem, 1995, 38(21), 4325-4331.
T2739	Shikimic Acid	Shikimate	莽草酸	板蓝根	连花清瘟胶囊	138-59-0	Others	O[C@@H]1CC(=C[C@@H](O)[C@H]1O)C(O)=O	C7H10O5	174.15	Others	Others	Others	Shikimic acid is a tri-hydroxy cyclohexene carboxylic acid important in the biosynthesis of so many compounds that the shikimate pathway is named after it.	Brown SA, et al. Nature, 1955, 175(4459), 688-689.
T1704	Diosmetin	Luteolin 4-methyl ether	香叶木素	丹参	血必净注射液	520-34-3	Flavonoid	COc1c(O)cc(cc1)c1cc(=O)c2c(O)cc(O)cc2o1	C16H12O6	300.26	Metabolism; Tyrosine Kinase/Adaptors	P450 inhibitor; Trk receptor agonist	CYP1A1; TrkB	Diosmetin has been found to act as a weak TrkB receptor agonist.	Sher E, et al. Pharmacol Res, 1992, 26(4), 395-402.
T3900	Emodin-8-glucoside	Emodin glucoside B;Anthraglycoside B	大黄素-8-β-D-吡喃葡萄糖苷	大黄	连花清瘟胶囊	23313-21-5	Others	Cc1cc(O)c2C(=O)c3c(O[C@@H]4O[C@H](CO)[C@@H](O)[C@H](O)[C@H]4O)cc(O)cc3C(=O)c2c1	C21H20O10	432.38	Others	Others	Others	Emodin-8-beta-D-glucoside functions to protect from focal cerebral injury induced by ischemia and reperfusion. Emodin-8-beta-D-glucoside directly stimulates cell proliferation and differentiation of osteoblasts.	Xue Y, et al. Screening of bioactive compounds in Rhizoma Polygoni Cuspidati with hepatocyte membranes by HPLC and LC-MS. J Sep Sci. 2014 Feb;37(3):250-6.
T5575	Cyclogalegenol	Astramembrangenin	环黄芪醇	黄芪	透解祛瘟颗粒	78574-94-4	others	[H][C@@]1([C@@H](O)C[C@@]2(C)[C@]3([H])C[C@H](O)[C@]4([H])[C@]5(C[C@@]35CC[C@]12C)CC[C@H](O)C4(C)C)[C@@]1(C)CC[C@H](O1)C(C)(C)O	C30H50O5	490.72	Chromatin/Epigenetic	Epigenetic Reader Domain	CREB	Astramembrangenin (Cycloastragenol) is a triterpenoid saponin compound and a hydrolysis product of the main active ingredient in Astragalus membranaceus. Cycloastragenol (CAG) may have a novel therapeutic role in depression	Sun C , Jiang M , Zhang L , et al. Cycloastragenol mediates activation and proliferation suppression in concanavalin A-induced mouse lymphocyte pan-activation model[J]. Immunopharmacology and Immunotoxicology, 2017, 39(3):131-139.
T4S1659	Xanthotoxol	8-Hydroxypsoralen;8-Hydroxypsoralene;8-Hydroxyfuranocoumarin;Psoralen	花椒毒酚	前胡	透解祛瘟颗粒	2009-24-7	Coumarins	Oc1c2occc2cc2ccc(=O)oc12	C11H6O4	202.16	GPCR/G Protein; Neuroscience	5-HT Receptor	5-HT Receptor	Xanthotoxol is a biologically active linear furocoumarin, shows strong pharmacological activities as anti-inflammatory, antioxidant, 5-HT antagonistic, and neuroprotective effects.	He W , Chen W , Zhou Y , et al. Xanthotoxol Exerts Neuroprotective Effects Via Suppression of the Inflammatory Response in a Rat Model of Focal Cerebral Ischemia[J]. Cellular & Molecular Neurobiology, 2013, 33(5):715-722.
T2767	Neohesperidin Dihydrochalcone	NHDC;Neohesperidin DC;NCI-c60764	新橙皮苷二氢查耳酮	枳实	清肺排毒汤	20702-77-6	Flavonoid	C[C@H]1[C@@H]([C@H]([C@H]([C@@H](O1)O[C@@H]1[C@H]([C@@H]([C@H](O[C@H]1Oc1cc(c(c(c1)O)C(=O)CCc1cc(c(cc1)OC)O)O)CO)O)O)O)O)O	C28H36O15	612.58	Others	Others	Others	Neohesperidin dihydrochalcone(NHDC) is an artificial sweetener derived from citrus.	Kroeze JH, Chem Senses, 2000, 25(5), 555-559.
T6S0107	Peimine	Dihydroisoimperialine;Verticine;Wanpeinine A	贝母素甲	浙贝母	金花清感颗粒	23496-41-5	Alkaloids	C[C@H]1CC[C@@H]2N(C1)C[C@H]1[C@@H]3C[C@H]4[C@@H](C[C@H](O)[C@H]5C[C@@H](O)CC[C@]45C)[C@@H]3CC[C@@H]1[C@]2(C)O	C27H45NO3	431.66	MAPK;NF-κB	Others	Others	1. Peimine has good anti-inflammatory effects in vivo. 2. Peimine is an inhibitor to inhibit LPS-induced production of inflammatory cytokines by blocking the MAPKs and NF-κB signaling pathway.	Yi P F , Wu Y C , Dong H B , et al. Peimine impairs pro-inflammatory cytokine secretion through the inhibition of the activation of NF-κB and MAPK in LPS-induced RAW264.7 macrophages[J]. Journal of Immunopharmacology, 2013, 35(5):6.
T3814	Isorhapontigenin	Isorhapotogenin	异丹叶大黄素	大黄	连花清瘟胶囊	32507-66-7	Phenols	COc1cc(ccc1O)\C=C\c1cc(O)cc(O)c1	C15H14O4	258.27	Others	Others	Others	Isorhapontigenin is a tetrahydroxylated stilbenoid with a methoxy group. It is an isomer of rhapontigenin and an analog of resveratrol. It is found in the Chinese herb Gnetum cleistostachyum, in Gnetum parvifolium and in the seeds of the palm Aiphanes aculeata.	Zeng X, et al. Induction of miR-137 by Isorhapontigenin (ISO) Directly Targets Sp1 Protein Translation and Mediates Its Anticancer Activity Both In Vitro and In Vivo. Mol Cancer Ther. 2016 Mar;15(3):512-22.
T3375	Verbascoside	Kusaginin;TJC160;Acteoside	毛蕊花苷	竹叶	银翘散	61276-17-3	Phenylpropanoids	C[C@@H]1O[C@@H](O[C@@H]2[C@@H](O)[C@H](OCCc3ccc(O)c(O)c3)O[C@H](CO)[C@H]2OC(=O)\C=C\c2ccc(O)c(O)c2)[C@H](O)[C@H](O)[C@H]1O	C29H36O15	624.59	Chromatin/Epigenetic; Apoptosis; Cytoskeletal Signaling; DNA Damage/DNA Repair	p53 inhibitor; PARP inhibitor; PKC inhibitor	p53; PARP1; PKC	Verbascoside is a protein kinase C inhibitor with antimicrobial, anti-inflammatory activities.	Herbert JM, et al. Natural Products, 1991, 54 (6): 1595–1600;
T6S1657	Paeonolide		丹皮酚原苷	芍药	清肺达原颗粒（肺炎1号）	72520-92-4	Phenols	COc1ccc(C(C)=O)c(O[C@@H]2O[C@H](CO[C@@H]3OC[C@H](O)[C@H](O)[C@H]3O)[C@@H](O)[C@H](O)[C@H]2O)c1	C20H28O12	460.43	Others	Others	Others
T2789	Scutellarin	Breviscapinun;Breviscapine;Scutellarein-7-glucuronide;Breviscapin	黄岑素	黄芩	痰热清注射液；小柴胡汤；清肺达原颗粒（肺炎1号）；清肺排毒汤；透解祛瘟颗粒；金花清感颗粒	27740-01-8	Flavonoid	c1cc(ccc1c1cc(=O)c2c(c(c(cc2o1)O[C@H]1[C@@H]([C@H]([C@@H]([C@H](O1)C(=O)O)O)O)O)O)O)O	C21H18O12	462.37	JAK/STAT Signaling; PI3K/Akt/mTOR signaling; Stem Cells	Akt; STAT	Akt; STAT	Scutellarin, an active flavone isolated from Scutellaria baicalensis, can inhibit RANKL-mediated MAPK and NF-κB signaling pathway in osteoclasts, and down-regulate the STAT3/Girdin/Akt signaling in HCC cells.	Ke Y, et al. Scutellarin suppresses migration and invasion of human hepatocellular carcinoma by inhibiting the STAT3/Girdin/Akt activity. Biochem Biophys Res Commun. 2016 Dec 18. pii: S0006-291X(16)32174-X.
T2843	Aloe-emodin	3-Hydroxymethylchrysazine;Rhabarberone;NSC 38628	芦荟大黄素	大黄	连花清瘟胶囊	481-72-1	Quinones	OCc1cc(O)c2C(=O)c3c(cccc3O)C(=O)c2c1	C15H10O5	270.24	Microbiology&Virology	HSV inhibitor	HSV-1; HSV-2	Aloe-emodin is an interferon-inducing agent, for JEV （IC50=1 μg/mL） and EV71（IC50=0.33 μg/mL ）.	Li SW, et al. Eur J Pharmacol. 2014 Sep 5;738:125-32.
T3236	Solanesol	Nonaisoprenol;Betulanonaprenol	茄尼醇	桑叶	透解祛瘟颗粒	13190-97-1	Miscellaneous	CC(=CCC/C(=C/CC/C(=C/CC/C(=C/CC/C(=C/CC/C(=C/CC/C(=C/CC/C(=C/CC/C(=C/CO)/C)/C)/C)/C)/C)/C)/C)/C)C	C45H74O	631.07	Others	Others	Others	Phytochemical present in tobacco leaf. Starting material for synthesis of co-enzyme Q10. Exhibits antiulcer activity.	Yao X, et al. Solanesol induces the expression of heme oxygenase-1 via p38 and Akt and suppresses the production of proinflammatory cytokines in RAW264.7 cells. Food Funct. 2017 Jan 25;8(1):132-141.
T2834	Nobiletin	Hexamethoxyflavone	川皮苷	枳实	清肺排毒汤	478-01-3	Flavonoid	COc1c(cc(cc1)c1cc(=O)c2c(o1)c(c(c(c2OC)OC)OC)OC)OC	C21H22O8	402.4	Proteases/Proteasome	MMP inhibitor	MMP	Nobiletin is a natural polymethoxylated flavone isolated from citrus peels with anti-inflammatory and anti-tumor activities. Nobiletin is practically insoluble (in water) and an extremely weak acidic compound (based on its pKa).	Murakami A, et al. Cancer Res, 2000, 60(18), 5059-5066.
T3149	Salvianolic Acid C		丹酚酸C	丹参	血必净注射液	115841-09-3	Others	OC(=O)[C@@H](Cc1ccc(O)c(O)c1)OC(=O)\C=C\c1ccc(O)c2oc(cc12)-c1ccc(O)c(O)c1	C26H20O10	492.43	Others	Others	Others	Salvianolic Acid C is extracted from the root of Salvia miltiorrhiza, a perennial plant in the genus Salvia.	Song J, et al. Biomed Chromatogr. 2016 Mar;30(3):376-83.
T0800	Antrapurol	1,8-Dihydroxyanthraquinone;Chrysazin;Danthron;Dantron	丹蒽醌	丹参	血必净注射液	117-10-2	Quinones	Oc1cccc2c1C(=O)c1c(cccc1O)C2=O	C14H8O4	240.22	PI3K/Akt/mTOR signaling	AMPK activator	AMPK	Danthron is a natural product, regulates glucose, and lipid metabolism by activating AMPK.	Zhou R, et al. Acta Pharmacol Sin. 2013 Aug; 34(8):1061-9.
T2822	Ginsenoside Rb1	Gypenoside III;Gypenoside Ⅲ	人参皂苷Rb1	人参	小柴胡汤	41753-43-9	Glycosides	C\C(C)=C/CC[C@](C)(O[C@@H]1O[C@H](CO[C@@H]2O[C@H](CO)[C@@H](O)[C@H](O)[C@H]2O)[C@@H](O)[C@H](O)[C@H]1O)[C@H]1CC[C@]2(C)[C@@H]1[C@H](O)C[C@@H]1[C@@]3(C)CC[C@H](O[C@@H]4O[C@H](CO)[C@@H](O)[C@H](O)[C@H]4O[C@@H]4O[C@H](CO)[C@@H](O)[C@H](O)[C@H]4O)C(C)(C)[C@@H]3CC[C@@]21C	C54H92O23	1109.29	Autophagy; Immunology/Inflammation; Membrane Transporter/Ion Channel; NF-κB	Autophagy; IRAK; Mitophagy;ATPase; NF-κB	Autophagy; IRAK; Mitophagy; (Na,K)-ATPase; NF-κB	Ginsenoside Rb1 is part of a class of steroid glycosides; may have properties that inhibit or prevent the growth of tumors.	Zhang XJ, et al. Vascul Pharmacol. 2015 Oct;73:86-95.
T2765	Rosmarinic acid	Labiatenic acid;Rosemary acid	迷迭香酸	丹参	血必净注射液	20283-92-5	Phenols	c1cc(c(cc1C[C@H](C(=O)O)OC(=O)/C=C/c1cc(c(cc1)O)O)O)O	C18H16O8	360.33	Metabolism;NF-Κb	MAO inhibitor;Transferase inhibitor;IκB/IKK	MAO-A; MAO-B; COMT;IKK β	Rosmarinic acid has shown to contain antioxidant, anti-inflammatory and antimicrobial activities. Possesses promising physiological actions related to cognitive performance, Alzheimer′s disease prevention, kideney disease treatment, cardioprotection and c	Andrade JM, et al. Combining in vitro and in silico approaches to evaluate the multifunctional profile of rosmarinic acid from Blechnum brasiliense on targets related to neurodegeneration. Chem Biol Interact. 2016 Jul 25;254:135-45.
T2795	Amygdalin	Laetrile	苦杏仁苷	苦杏仁	连花清瘟胶囊	29883-15-6	Glycosides	c1ccc(cc1)[C@H](C#N)O[C@H]1[C@@H]([C@H]([C@@H]([C@H](O1)CO[C@H]1[C@@H]([C@H]([C@@H]([C@H](O1)CO)O)O)O)O)O)O	C20H27NO11	457.43	Others	Others	Others	Amygdalin has antifibrotic, antitumor, anti-inflammatory and analgesic effects, amygdalin joint HSYA could inhibit the degeneration of the endplate chondrocytes derived from intervertebral discs of rats induced by IL-1beta and better than the single use of Amygdalin or HSYA. Amygdalin induces apoptotic cell death in human DU145 and LNCaP prostate cancer cells by caspase-3 activation through down-…	Song Z, et al. Advanced research on anti-tumor effects of amygdalin. J Cancer Res Ther. 2014 Aug;10 Suppl 1:3-7.
T2733	Sarsasapogenin	Sarsagenin;Parigenin	知母皂苷元	知母	清肺达原颗粒（肺炎1号）	126-19-2	Steroids	O1[C@@H]2[C@@H]([C@@]3([C@H]([C@H]4[C@@H]([C@@]5([C@H](CC4)C[C@@H](O)CC5)C)CC3)C2)C)[C@@H]([C@@]21OC[C@H](CC2)C)C	C27H44O3	416.65	Apoptosis	Apoptosis inducer	Apoptosis inducer	Sarsasapogenin is a steroidal sapogenin, that is the aglycosidic portion of a plant saponin. It is named after sarsaparilla (Smilax sp.), a family of climbing plants found in subtropical regions. It was one of the first sapogenins to be identified, and the first spirostan steroid to be identified as such.	Lim SM, et al. Int Immunopharmacol. 2015 Apr;25(2):493-503.
T1548	8-Methoxypsoralen	8-MOP;Xanthotoxin;Methoxsalen;NCI-C55903	8-甲氧基补骨脂素	前胡	透解祛瘟颗粒	298-81-7	Coumarins	COc1c2oc(=O)ccc2cc2c1occ2	C12H8O4	216.19	DNA Damage/DNA Repair	DNA Alkylation agonist	DNA	Methoxsalen is a Photoactivated Radical Generator and Psoralen. The mechanism of action of methoxsalen is as a Photoabsorption. The physiologic effect of methoxsalen is by means of Photosensitizing Activity.	Zhang W, et al. Drug Metab Dispos,2001, 29(6), 897-902.
T2766	Arctiin	Arctigenin-4-glucoside;NSC 315527;Arctii	牛蒡子苷	牛蒡子	银翘散；金花清感颗粒	20362-31-6	Glycosides	COc1ccc(C[C@H]2COC(=O)[C@@H]2Cc2ccc(c(c2)OC)O[C@H]2[C@@H]([C@H]([C@@H]([C@@H](CO)O2)O)O)O)cc1OC	C27H34O11	534.55	Metabolism	AdipoR	AdipoR	Arctiin acts on an agonists of the adiponectin receptor 1 with anti-cancer effects.	Matsuzaki Y, et al. Oncol Rep. 2008, 19(3):721-7.
T3S1068	Oxyresveratrol	trans-Oxyresveratrol;Tetrahydroxystilbene;2,3',4,5'-tetrahydroxystilbene	氧化白藜芦醇	虎杖	清肺达原颗粒（肺炎1号）	29700-22-9	Phenols	Oc1ccc(\C=C\c2cc(O)cc(O)c2)c(O)c1	C14H12O4	244.24	Proteases/Proteasome	Tyrosinase	Tyrosinase	1. Oxyresveratro can inhibit tyrosinase activity. 2. Oxyresveratro is useful to trauma models, as toxicity to glia could be beneficial by inhibiting reactive gliosis. 3. Oxyresveratrol has antioxidant activity, can reduce neuronal oxidative damage and protect hepatocytes against oxidative stress and mitochondrial dysfunction, which may be associated with activation of Nrf2.	Chao J , Yu M S , Ho Y S , et al. Dietary oxyresveratrol prevents parkinsonian mimetic 6-hydroxydopamine neurotoxicity[J]. Free Radical Biology and Medicine, 2008, 45(7):1019-1026.
T5S0168	Atractylenolide II	Asterolide;2-Atractylenolide	白术内酯II；苍术内酯II	白术	清肺排毒汤	73069-14-4	Sesquiterpenoids	CC1=C2C[C@H]3C(=C)CCC[C@]3(C)C[C@@H]2OC1=O	C15H20O2	232.32	JAK/STAT signaling;MAPK;PI3K/Akt/mTOR signaling	STAT;p38 MAPK;ERK;Akt	STAT3 inhibitor;p38 activator;ERK inhibitor;Akt inhibitor	1. Atractylenolide II has antimelanoma effect by inhibiting STAT3 signalling. 2. Atractylenolide II has cytotoxic/apoptotic effects may via p38 activation , ERK and Akt inactivation, p53 dependent.	Fu X Q , Chou G X , Kwan H Y , et al. Inhibition of STAT3 signalling contributes to the antimelanoma action of atractylenolide II[J]. Experimental Dermatology, 2014, 23(11):855-857.
T6S1292	Levistilide A	Diligustilide;Levistolide A	欧当归内酯A	川芎	血必净注射液	88182-33-6	Miscellaneous	CCC\C=C1OC(=O)C2=C/1CC[C@H]1[C@@H]3CC[C@]4([C@@H]21)C(=C3)C(=O)O\C4=C/CCC	C24H28O4	380.48	Others	Others	Others	1. Levistilide A inhibits liver fibrosis and angiogenesis.	He W Q , Lv W S , Zhang Y , et al. Study on Pharmacokinetics of Three Preparations from Levistolide A by LC-MS-MS.[J]. Journal of Chromatographic Science, 2015, 53(8):1265.
T3820	Iridin	Lridin	野鸢尾苷	射干	清肺排毒汤	491-74-7	Others	COc1cc(cc(O)c1OC)-c1coc2cc(O[C@@H]3O[C@H](CO)[C@@H](O)[C@H](O)[C@H]3O)c(OC)c(O)c2c1=O	C24H26O13	522.46	Others	Others	Others	Iridin is major active ingredient of Iris dichotoma which could be used as the drug for pain, inflammation treatment
T2854	Forsythin	Phillyrin	连翘苷	连翘	连花清瘟胶囊；痰热清注射液；银翘散；透解祛瘟颗粒	487-41-2	Glycosides	[C@@H]1([C@@H]([C@H]([C@@H]([C@H](O1)CO)O)O)O)Oc1c(cc(cc1)[C@H]1OC[C@H]2[C@@H]1CO[C@H]2c1cc(c(cc1)OC)OC)OC	C27H34O11	534.56	PI3K/Akt/mTOR signaling	AMPK	AMPK	Phillyrin is a novel AMPK activator, has anti-obesity effects in nutritive obesity mice, it can prevent lipid accumulation in HepG2 cells by blocking the expression of SREBP-1c and FAS through LKB1/AMPK activation. Phillyrin may be a new preventive agent of acute lung injury in the clinical setting, it potentially contributes to the suppression of the activation of MAPK and NF-κB pathways, it als…	Do MT, et al. Phillyrin attenuates high glucose-induced lipid accumulation in human HepG2 hepatocytes through the activation of LKB1/AMP-activated protein kinase-dependent signalling. Food Chem. 2013 Jan 15;136(2):415-25.
T4859	rac-Glycerol 1-myristate	Monomyristin;Glyceryl myristate;2,3-Dihydroxypropyl tetradecanoate	肉豆寇酸单甘油酯	前胡	透解祛瘟颗粒	589-68-4	Others	CCCCCCCCCCCCCC(=O)OCC(O)CO	C17H34O4	302.45	Others	Others	Others	1-Myristoyl-rac-glycerol, a 1-monoglyceride of myristic acid, has antibacterial activity against several Gram-positive bacterial strains. 1-Myristoyl-rac-glycerol is used in colloidal chemistry as a nonionic surfactant in the development of micelles.	Shrestha L. K., et al.: J. Phys. Chem., 113(18), 6290 (2009)
T3325	Liquiritigenin	4',7-Dihydroxyflavanone	甘草素	甘草	连花清瘟胶囊；小柴胡汤	578-86-9	Flavonoid	C1[C@H](Oc2c(C1=O)ccc(c2)O)c1ccc(cc1)O	C15H12O4	256.25	Endocrinology/Hormones	Estrogen/progestogen Receptor agonist	ERβ	Liquiritigenin, a flavonoid aglycone from licorice, is a highly selective estrogen receptor β (ERβ) agonist.	Kim, YW. Gastrointestinal and Liver Physiology. 296 (2): G372–81.
T3328	Angelic Acid	(Z)-2-Methylbut-2-enoic acid;2-Methylisocrotonic acid;cis-2-Methyl-2-butenoic acid	当归酸	当归	血必净注射液	565-63-9	Miscellaneous	C/C=C(/C)\C(=O)O	C5H8O2	100.12	Others	Others	Others	Angelic acid is a monocarboxylic unsaturated organic acid. Angelic acid esters are the active components of herbal medicine used against a wide range of various health disturbances including pains, fever, gout, heartburn, etc.	Ernest Small Culinary herbs, National Research Council Canada, 2006, p. 288
T4S0350	Licochalcone B		甘草查尔酮B	甘草	连花清瘟胶囊；小柴胡汤	58749-23-8	Chalcones	COc1c(\C=C\C(=O)c2ccc(O)cc2)ccc(O)c1O	C16H14O5	286.28	Others	Others	Others	1. Licochalcone B (LCB) inhibits the proliferation of human malignant bladder cancer cell lines (T24 and EJ) in vitro and antitumor activity in vivo in MB49 (murine bladder cancer cell line) tumor model. 2. LCB and Licochalcone D(LCD) significantly reduced the LPS-induced production of NO, TNFalpha and MCP-1. 3. A novel LCB derivative compound: (E)-3-(3, 4-dihydroxy-2-methoxyphenyl)-1-(2, 4-dihyd…	Yuan X, Li T, Xiao E, et al. Licochalcone B inhibits growth of bladder cancer cells by arresting cell cycle progression and inducing apoptosis[J]. Food & Chemical Toxicology, 2014, 65(1):242-251.
T2973	Astragaloside IV	AST-IV;AS-IV	黄芪甲苷IV	黄芪	透解祛瘟颗粒	84687-43-4	Glycosides	CC(C)(O)[C@@H]1CC[C@@](C)(O1)[C@H]1[C@@H](O)C[C@@]2(C)[C@@H]3C[C@H](O[C@@H]4O[C@H](CO)[C@@H](O)[C@H](O)[C@H]4O)[C@@H]4[C@]5(C[C@@]35CC[C@]12C)CC[C@H](O[C@@H]1OC[C@@H](O)[C@H](O)[C@H]1O)C4(C)C	C41H68O14	784.99	Endocrinology/Hormones	Estrogen/progestogen Receptor antagonist	ERS	Astragaloside IV, an active component isolated from Astragalus membranaceus, suppresses the activation of ERK1/2 and JNK, and downregulates matrix metalloproteases (MMP)-2, (MMP)-9 in MDA-MB-231 breast cancer cells. Astragaloside IV is a bioactive saponin first isolated from the dried plant roots of the genus Astragalus, which is used in traditional Chinese medicine.1 It dose-dependently inhibits…	Li M, et al. Astragaloside IV attenuates cognitive impairments induced by transient cerebral ischemia and reperfusion in mice via anti-inflammatory mechanisms. Neurosci Lett. 2016 Dec 20. pii: S0304-3940(16)3201994-6
T5S1094	Forsythoside E		连翘酯苷E	连翘	连花清瘟胶囊；痰热清注射液；银翘散；透解祛瘟颗粒	93675-88-8	Phenylpropanoids	C[C@@H]1O[C@@H](OC[C@H]2O[C@@H](OCCc3ccc(O)c(O)c3)[C@H](O)[C@@H](O)[C@@H]2O)[C@H](O)[C@H](O)[C@H]1O	C20H30O12	462.44	Others	Others	Others	Forsythoside E is a natutal product isolated from fruits of forsythia suspensa.	Long-Hai J , Qing H U , Ji-Qiang Z , et al. Determination of forsythoside E in Tanreqing injection by LC-MS/MS[J]. Chinese Journal of Pharmaceutical Analysis, 2013.
T3666	Atractylodin	Atractydin	苍术素	苍术	透解祛瘟颗粒	55290-63-6	Miscellaneous	C/C=C/C#CC#C/C=C/c1ccco1	C13H10O	182.22	Metabolism	Lipid inhibitor	lipase	Atractylodin has high lipase inhibitory activity (IC5:39.12 μM); Atractylodin possesses strong repellency activities against T. castaneum adults (LD50: 1.83 μg/cm). The repellency of Atractylodin (0.63 μg/cm) can achieve >90%.	Tao J, et al. Zhongguo Zhong Yao Za Zhi. 2011 Jan;36(1):27-31.
T3675	1-Deoxynojirimycin	Duvoglustat;moranolin;Moranoline	1-脱氧野尻霉素	桑叶	透解祛瘟颗粒	19130-96-2	Miscellaneous	C1[C@@H]([C@H]([C@@H]([C@H](N1)CO)O)O)O	C6H13NO4	163.17	Others	Others inhibitor	α-glycosidase	1-Deoxynojirimycin is a potent α-glucosidase inhibitor, suppressing postprandial blood glucose, thereby possibly preventing diabetes mellitus.	Jiang P, et al. Sci Rep. 2015 Feb 24;5:8563.
T3405	6-Gingerol	(S)-(+)-[6]Gingerol;[6]-Gingerol;gingerol	6-姜酚	生姜	小柴胡汤；清肺排毒汤	23513-14-6	Phenols	CCCCC[C@@H](CC(=O)CCc1cc(c(cc1)O)OC)O	C17H26O4	294.4	Apoptosis; Epigenetics; PI3K/Akt/mTOR	AMPK; Apoptosis	AMPK; Apoptosis	6-Gingerol, an antioxidant, protects HL-60 cells from oxidative stress. It has protective effects for Yous tumors in the pancreas, ovaries, breast tissue, the bowel, among other tissues.	Radhakrishnan EK, et al. [6]-Gingerol induces caspase-dependent apoptosis and prevents PMA-induced proliferation in colon cancer cells by inhibiting MAPK/AP-1 signaling. PLoS One. 2014 Aug 26;9(8):e104401.
T0729	Benzyl benzoate	Benzoic acid benzyl ester;Ascabiol;Novoscabin;Scabitox	苯甲酸苄酯	桂枝	清肺排毒汤	120-51-4	Others	O=C(OCc1ccccc1)c1ccccc1	C14H12O2	212.24	Others	Others	Others	Benzyl benzoate is one of the older preparations used for the therapy of scabies. Scabies is a skin infection caused by the Sarcoptes scabiei. Its symptoms are red spots, severe itching (particularly at night), and may lead to a secondary infection. Benzyl benzoate is useful in the therapy of scabies because it is lethal to this mite. It is also used for the therapy of lice affection of the body …	Charles AK, et al. J Appl Toxicol. 2009, 29(5):422-434.
T6S2024	Harpagide		哈巴苷	玄参	透解祛瘟颗粒	6926-08-5	Iridoids	C[C@]1(O)C[C@@H](O)[C@]2(O)C=CO[C@@H](O[C@@H]3O[C@H](CO)[C@@H](O)[C@H](O)[C@H]3O)[C@H]12	C15H24O10	364.34	Microbiology&Virology;Immunology/Inflammation	antibacterial	antibacterial	1. Harpagide has antibacterial activity. 2. Harpagide has antiviral activity. 3. Harpagide has anti-inflammatory activity.	Zhongsheng C , Keqian D , Huanyun M . Protective effects of Harpagide and Harpagoside on human vascular endothelial cells injury induced by hydrogen peroxide[J]. Medical Research and Education, 2009.
T2S0843	Negletein	7-O-Methylbaicalein;Baicalein-7-methylether	黄芩素-7-甲醚	黄芩	痰热清注射液；小柴胡汤；清肺达原颗粒（肺炎1号）；清肺排毒汤；透解祛瘟颗粒；金花清感颗粒	29550-13-8	Ketone	COc1cc2oc(cc(=O)c2c(O)c1O)-c1ccccc1	C16H12O5	284.26	Immunology/Inflammation	Others	Others	1. Negletein has anti-inflammatory and immunomodulatory activities via inhibition of TNF-α, iNOS and IL-1β. 2. Negletein as a neuroprotectant enhances the action of nerve growth factor and induces neurite outgrowth in PC12 cells. 3. Negletein shows a comparable redox-active potential, and it (50 μM, 4 h) can activate Nrf2. 4. Negletein shows significant antimicrobial activity. 5. Negletein has an…	Phan, C., Sabaratnam, V., Bovicelli, P., Righi, G., & Saso, L. (2016). Negletein as a neuroprotectant enhances the action of nerve growth factor and induces neurite outgrowth in PC12 cells. Biofactors, 42(6), 591-599. doi: 10.1002/biof.1296
T5751	Tigogenin		剑麻皂苷元	丹参	血必净注射液	77-60-1	Steroids	[H][C@]12C[C@@]3([H])[C@]4([H])CC[C@@]5([H])C[C@@H](O)CC[C@]5(C)[C@@]4([H])CC[C@]3(C)[C@@]1([H])[C@H](C)[C@@]1(CC[C@@H](C)CO1)O2	C27H44O3	416.6	Others	Others	Others	Tigogenin is one of steroidal sapogenins which is widely used for synthesizing steroid drugs. It might have protective effect on bone and be helpful in preventing the development of osteoporosis.	Zhou H , Yang X , Wang N , et al. Tigogenin inhibits adipocytic differentiation and induces osteoblastic differentiation in mouse bone marrow stromal cells[J]. Molecular and Cellular Endocrinology, 2007, 270(1-2):17-22.
T6S1537	Cryptochlorogenic acid	4-O-Caffeoylquinic acid;4-Caffeoylquinic acid	隐绿原酸	金银花	连花清瘟胶囊；热毒宁注射液；痰热清注射液；透解祛瘟颗粒；透解祛瘟颗粒；金花清感颗粒	905-99-7	Phenylpropanoids	O[C@@H]1C[C@@](O)(C[C@@H](O)[C@H]1OC(=O)\C=C\c1ccc(O)c(O)c1)C(O)=O	C16H18O9	354.31	oxidation-reduction	Antioxidant	Antioxidant	1. Cryptochlorogenic acid has antioxidant activity.	Nakatani N , Kayano S I , Kikuzaki H , et al. Identification, quantitative determination, and antioxidative activities of chlorogenic acid isomers in prune (Prunus domestica L. )[J]. J Agric Food Chem, 2000, 48(11):5512-5516.
T3S1390	Leucoside	Kaempferol 3-sambubioside;Kaempferol 3-O-sambubioside	堪非醇3-O-桑布双糖苷	红景天	连花清瘟胶囊	27661-51-4	Flavonoid	OC[C@H]1O[C@@H](Oc2c(oc3cc(O)cc(O)c3c2=O)-c2ccc(O)cc2)[C@H](O[C@@H]2OC[C@@H](O)[C@H](O)[C@H]2O)[C@@H](O)[C@@H]1O	C26H28O15	580.49	Others	Others	Others	Leucoside is a naturally occuring flavonol bioside with many biological activities.	Chung, D. et al.: J. Sci. Food. Agric., 93, 362 (2013)
T6S1101	Astragalin	3-Glucosylkaempferol;Kaempferol 3-β-D-glucopyranoside;Astragaline;kaempferol-3-glucoside;Kaempferol 3-O-glucoside;Kaempferol 3-D-glucoside	紫云英苷	甘草	连花清瘟胶囊；小柴胡汤	480-10-4	Flavonoid	OC[C@H]1O[C@@H](Oc2c(oc3cc(O)cc(O)c3c2=O)-c2ccc(O)cc2)[C@H](O)[C@@H](O)[C@@H]1O	C21H20O11	448.38	Immunology/Inflammation	Others	Others	1. Astragalin may be a potential agent in the treatment of osteoarthritis. 2. Astragalin can be effective in allaying ROS-promoted bronchial fibrosis through inhibiting autophagosome formation in airways. 3. Astragalin ameliorates oxidative stress-associated epithelial eosinophilia and apoptosis through disturbing TLR4-PKCβ2-NADPH oxidase-responsive signaling. 4. Astragalin exerts anti-inflammato…	Li F , Wang W , Cao Y , et al. Inhibitory effects of astragalin on lipopolysaccharide-induced inflammatory response in mouse mammary epithelial cells[J]. Journal of Surgical Research, 2014, 192(2):573-581.
T3S1265	Liriopesides B	Nolinospiroside F	山麦冬皂苷B	麦冬	参麦注射液；生脉注射液	87425-34-1	Steroids	C[C@H]1[C@H]2[C@H](C[C@H]3[C@@H]4CC=C5C[C@H](C[C@@H](O[C@@H]6O[C@H](C)[C@H](O)[C@H](O)[C@H]6O)[C@]5(C)[C@H]4CC[C@]23C)O[C@@H]2O[C@@H](C)[C@H](O)[C@@H](O)[C@H]2O)O[C@]11CC[C@H](C)CO1	C39H62O12	722.91	Others	Others	Others	Liriopesides B exhibited potential anticancer activity against human ovarian cancer A2780 cells.	Wang, H., Yu, H., Sun, Y., Zhao, H., Guo, Z., & Yu, B. (2017). Liriopesides B inhibited cell growth and decreased CA125 level in human ovarian cancer A2780 cells. Natural Product Research, 31(18), 2198-2202. doi: 10.1080/14786419.2017.1320788

## Sheet: M26713
ID	Name	Synonyms	Chinese Name	Source	方剂来源	CAS	Category	SMILES	Formula	MolWt	Pathways	Target	Receptor	Bioactivity	Reference
T2S2295	Timosaponin A1		知母皂苷A1	知母	清肺达原颗粒（肺炎1号）	68422-00-4	Steroids	[H][C@]12C[C@@]3([H])[C@]4([H])CC[C@]5([H])C[C@H](CC[C@]5(C)[C@@]4([H])CC[C@]3(C)[C@@]1([H])[C@H](C)[C@@]1(CC[C@H](C)CO1)O2)O[C@@H]1O[C@H](CO)[C@H](O)[C@H](O)[C@H]1O	C33H54O8	578.8	Others	Others	Others	Timosaponin A1 is a coprostane type steroidal saponin isolated from Rhizoma Anemarrhenae.	Xue-Li W U , Yi W , Xiao-Ping Z . Screening and identification of DPP-4 inhibitors from Xiaokean formula by a fluorescent probe[J]. China Journal of Chinese Materia Medica, 2016:1241-1245.
T5S1645	Apiopaeonoside		化合物Apiopaeonoside	芍药	清肺达原颗粒（肺炎1号）	100291-86-9	Phenols	COc1ccc(C(C)=O)c(O[C@@H]2O[C@H](CO[C@@H]3OC[C@](O)(CO)[C@H]3O)[C@@H](O)[C@H](O)[C@H]2O)c1	C20H28O12	460.43	Others	Others	Others	Apiopaeonoside is a natural product isolated from the root of Paeonia suffruticosa	Yu J, et al. A new compound, apiopaeonoside, isolated from the root of Paeonia suffruticosa. Yao Xue Xue Bao. 1986 Mar;21(3):191-7.
T3914	Saikosaponin C		柴胡皂苷C	柴胡	小柴胡汤；清肺达原颗粒（肺炎1号）；清肺排毒汤；透解祛瘟颗粒	20736-08-7	Triterpenoids	[C@@H]1([C@@H]([C@@H]([C@H]([C@@H](O1)C)O)O)O)O[C@@H]1[C@H](O[C@H]([C@@H]([C@H]1O)O)O[C@H]1CC[C@]2([C@H](C1(C)C)CC[C@]1([C@@]3(C[C@@H]([C@@]45CCC(C[C@H]4[C@]3(C=C[C@H]21)OC5)(C)C)O)C)C)C)CO[C@H]1[C@@H]([C@H]([C@@H]([C@H](O1)CO)O)O)O	C48H72O17	927.14	Apoptosis; Proteases/Proteasome	Caspase inhibitor	Caspase-3	Saikosaponin C efficiently inhibited LPS-induced apoptotic cell death via inhibition of caspase-3 activation and caspase-3-mediated-FAK degradation.	Lee TH1, Chang J2, Kim BM3. Saikosaponin C inhibits lipopolysaccharide-induced apoptosis by suppressing caspase-3 activation and subsequent degradation of focal adhesion kinase in human umbilical vein endothelial cells.Biochem Biophys Res Commun. 2014 Mar 14;445(3):615-21.
TL0001	dencichine	L-Dencichin;ODAP;Dencichin	三七素	人参	小柴胡汤	5302-45-4	Alkaloids	C([C@@H](C(=O)O)N)NC(=O)C(=O)O	C5H8N2O5	176.13	Others	Others	Others	Dencichine is a neurotoxic agent. Dencichine is a haemostatic agent, the hemostatic effect relates to modulation of the coagulation system, platelet aggregation and fibrinolytic system. It has renoprotective effect, it could significantly prevent the progression of diabetic nephropathy possibly attribute to down-regulation of the TGF-β/Smad pathway and rebalance the deposition and degradation of …	Xie G X, et al. Analysis of dencichine in Panax notoginseng by gas chromatography–mass spectrometry with ethyl chloroformate derivatization[J]. Journal of Pharmaceutical & Biomedical Analysis, 2007, 43(3):920-925.
T6S1653	Albiflorin	Alibiflorin	芍药内酯苷	芍药	清肺达原颗粒（肺炎1号）	39011-90-0	Monoterpenoids	C[C@]12C[C@@H](O)[C@@H]3C[C@@]1(O[C@@H]1O[C@H](CO)[C@@H](O)[C@H](O)[C@H]1O)C3(COC(=O)c1ccccc1)C(=O)O2	C23H28O11	480.46	Immunology/Inflammation	Others	Others	1. Albiflorin has anticonvulsant effect for pain relief. 2. Albiflorin and paeoniflorin has neuroprotective action against Glu toxicity. 3. Albiflorin and paeoniflorin significantly ameliorated Glu-induced reduction of cell viability, nuclear and mitochondrial apoptotic alteration, reactive oxygen species accumulation and B-cell lymphoma 2 (Bcl-2)/Bax ratio. 4. Albiflorin can serve as a new chemi…	Suh K S , Choi E M , Lee Y S , et al. Protective effect of albiflorin against oxidative-stress-mediated toxicity in osteoblast-like MC3T3-E1 cells[J]. Fitoterapia, 2013, 89(1):33-41.
T6S1917	Gomisin A	TJN-101;Wuweizi alcohol-B;Schisandrol B;Schizandrol B;Besigomsin;Gamma-Schisandrin	戈米辛A	五味子	生脉注射液	58546-54-6	Lignans	COc1cc2C[C@](C)(O)[C@@H](C)Cc3cc4OCOc4c(OC)c3-c2c(OC)c1OC	C23H28O7	416.47	Autophagy	Autophagy	Autophagy	1. Gomisin A may exert neuroprotective effects by attenuating the microglia-mediated neuroinflammatory response via inhibiting the TLR4-mediated NF-κB and MAPKs signaling pathways. 2. Gomisin A has anti-inflammatory property, potentially result from the inhibition of COX-2, iNOS, IL-6, TNF-α and NO through the down-regulation of RIP2 and NF-κB activation. 3. Gomisin A induces marked protective ef…	Hwang, Dae. Protective effects of gomisin A isolated from Schisandra chinensis against CCl4-induced hepatic and renal injury[J]. International Journal of Molecular Medicine, 2013, 31(4):888---898.
T4S1422	Praeruptorin E		白花前胡素E	前胡	透解祛瘟颗粒	78478-28-1	Coumarins	C\C=C(\C)C(=O)O[C@H]1[C@@H](OC(=O)CC(C)C)c2c(OC1(C)C)ccc1ccc(=O)oc21	C24H28O7	428.48	Others	Others	Others	1. Praeruptorin C and E can relax swine coronary artery and decrease contractility in guinea-pig left atria, these effects are similar in many respects to those displayed by drugs that have calcium entry blocking activity. 2. Praeruptorin D and E can protect mice from hydrochloric acid (HCl)-induced lung injury by inhibiting polymorphonuclear leukocytes (PMNs) influx, IL-6 release and protein exu…	Yu P J , Li J R , Zhu Z G , et al. Praeruptorin D and E attenuate lipopolysaccharide/hydrochloric acid induced acute lung injury in mice[J]. European Journal of Pharmacology, 2013, 710(1-3):39-48.
T2756	Swertiamarin	Swertiamaroside	獐牙菜苦甙	鱼腥草	连花清瘟胶囊	17388-39-5	Glycosides	OC[C@H]1O[C@@H](O[C@@H]2OC=C3C(=O)OCC[C@@]3(O)[C@H]2C=C)[C@H](O)[C@@H](O)[C@@H]1O	C16H22O10	374.34	Others	Others	Others	Swertiamarin is a common secoiridoid found among the members of Gentianaceae with anti-inflammatory, anticancer, hypoglycemic and hypolipidemic activities.	Saravanan S, et al. Eur J Pharm Sci. 2014 Jun 2;56:70-86.
T6S1538	Neochlorogenic acid	trans-5-O-Caffeoylquinic acid;Neochlorogenate;5-O-Caffeoylquinic acid	新绿原酸	金银花	连花清瘟胶囊；热毒宁注射液；痰热清注射液；透解祛瘟颗粒；透解祛瘟颗粒；金花清感颗粒	906-33-2	Phenylpropanoids	O[C@@H]1C[C@@](O)(C[C@@H](OC(=O)\C=C\c2ccc(O)c(O)c2)[C@H]1O)C(O)=O	C16H18O9	354.31	Microbiology&Virology	antibacterial	antibacterial	(E)-Neochlorogenic Acid is an antioxidant compound used in the treatment of oxidative stress and related afflictions.	Neochlorogenic Acid Inhibits Lipopolysaccharide-Induced Activation and Pro-inflammatory Responses in BV2 Microglial Cells[J]. Neurochemical Research, 2015, 40(9):1792-1798.
TMA0958	Arenarioside		三糖苯丙素苷	连翘	连花清瘟胶囊；痰热清注射液；银翘散；透解祛瘟颗粒	94130-58-2	Others	C[C@@H]1O[C@@H](O[C@@H]2[C@@H](O)[C@H](OCCc3ccc(O)c(O)c3)O[C@H](CO[C@@H]3OC[C@@H](O)[C@H](O)[C@H]3O)[C@H]2OC(=O)\C=C\c2ccc(O)c(O)c2)[C@H](O)[C@H](O)[C@H]1O	C34H44O19	756.7	Others	Others	Others	Arenarioside is a natural product, and GI50 values of 10-16 microM against B16F10 cell.	Abe F , Nagao T , Okabe H . Antiproliferative Constituents in Plants 9. Aerial Parts of Lippia dulcis and Lippia canescens[J]. Biological & Pharmaceutical Bulletin, 2002, 25(7):920-922.
T5S0691	Shionone	Shionon	紫菀酮	紫菀	清肺排毒汤	10376-48-4	Triterpenoids	CC1C(=O)CCC2C1(CCC3C2(CCC4(C3(CCC(C4)(C)CCC=C(C)C)C)C)C)C	C30H50O	426.72	Others	Others	Others	1. Shionone has anti-tussive and anti-inflammatory effects.	Fang W , Gang R , Ling-Ling P , et al. Study on anti-inflammatory mechanism of shionone based on NF-κB pathway in vitro[J]. China Journal of Traditional Chinese Medicine & Pharmacy, 2016.
T2898	Andrographolide	Andrographis	穿心莲内酯	穿心莲	喜炎平注射液	5508-58-7	Terpenoids	C[C@@]1(CO)[C@H](O)CC[C@@]2(C)[C@H](C\C=C3/[C@H](O)COC3=O)C(=C)CC[C@H]12	C20H30O5	350.44	NF-Κb	NF-κB inhibitor	NF-κB	Andrographolide(Andrographis), an irreversible antagonist of NF-κB, has anti-inflammatory and anti-platelet aggregation activities and potential antineoplastic.	Li GF, Qin YH, Du PQ. Life Sci. 2015 Sep 1;136:67-72.
T3926	Echinatin	Retrochalcone	刺甘草查尔酮	甘草	连花清瘟胶囊；小柴胡汤	34221-41-5	Chalcones	COc1cc(O)ccc1\C=C\C(=O)c1ccc(O)cc1	C16H14O4	270.28	oxidation-reduction	Free radical scavengers	Free radical scavengers	Echinatin disturb the mitochondrial energy transfer reactions and membrane permeability, at a low concentration cause deterioration of respiratory control and oxidative phosphorylation of isolated rat liver mitochondria, inhibits DNP-ATPase activity while stimulating range latent ATPase activity. Echinatin has significant antioxidant activities, it shows strong scavenging activity toward the ABTS…	Inoue B, et al. The effects of echinatin and its related compounds on the mitochondrial energy transfer reaction.[J]. Journal of Toxicological Sciences, 1982, 7(4):245.
T5761	Notoginsenoside Ft1		三七皂苷FT1	人参	小柴胡汤	155683-00-4	Triterpenoids	CC(C)=CCCC(C)(O)C1CCC2(C)C1C(O)CC1C3(C)CCC(OC4OC(CO)C(O)C(O)C4OC4OC(CO)C(O)C(O)C4OC4OCC(O)C(O)C4O)C(C)(C)C3CCC21C	C47H80O17	917.13	Others	Others	Others	Notoginsenoside Ft1 is a saponin originally isolated from P. notoginseng with diverse biological activities	Shen K , Ji L , Gong C , et al. Notoginsenoside Ft1 promotes angiogenesis via HIF-1α mediated VEGF secretion and the regulation of PI3K/AKT and Raf/MEK/ERK signaling pathways[J]. Biochemical Pharmacology, 2012, 84(6).
T5805	Norarecoline hydrochloride		1,2,5,6-四氢吡啶-3-甲酸甲酯盐酸盐	槟榔	清肺达原颗粒（肺炎1号）	6197-39-3	Alkaloids	Cl.COC(=O)C1=CCCNC1	C7H12ClNO2	177.63	Neuroscience	AChR	muscarinic receptor	Norarecoline hydrochloride is a muscarinic agonist.	Wolfpflugmann M , Lambrecht G , Wess J , et al. Synthesis and muscarinic activity of a series of tertiary and quaternary N-substituted guvacine esters structurally related to arecoline and arecaidine propargyl ester.[J]. Arzneimittel-Forschung, 1989, 39(5):539-44.
T6S2023	Harpagoside		哈巴俄苷	玄参	透解祛瘟颗粒	19210-12-9	Iridoids	C[C@@]1(C[C@@H](O)[C@]2(O)C=CO[C@@H](O[C@@H]3O[C@H](CO)[C@@H](O)[C@H](O)[C@H]3O)[C@H]12)OC(=O)\C=C\c1ccccc1	C24H30O11	494.49	Immunology/Inflammation	Others	Others	1. Harpagoside has anti-inflammatory activity. 2. Harpagoside at 3 mM concentration, shows moderate inhibition of seed germination. 3. Harpagoside can inhibit lipopolysaccharide-induced mRNA levels and protein expression of cyclooxygenase-2 and inducible nitric oxide in HepG2 cells.	Kim T K , Park K S . Inhibitory effects of harpagoside on TNF-α-induced pro-inflammatory adipokine expression through PPAR-γ activation in 3T3-L1 adipocytes[J]. Cytokine, 2015, 76(2):S104346661500201X.
T4589	9'''-MethyllithosperMate B		9’’’-丹酚酸B单甲酯	丹参	血必净注射液	1167424-32-9	Phenylpropanoids	COC(=O)[C@@H](Cc1ccc(O)c(O)c1)OC(=O)\C=C\c1ccc(O)c2O[C@@H]([C@@H](C(=O)O[C@H](Cc3ccc(O)c(O)c3)C(O)=O)c12)c1ccc(O)c(O)c1	C37H32O16	732.7	Others	Others	Others		Zhang Z F, Chen H S, Li J R, et al. Studies on polyphenolic chemical constitutents from root of Salvia yunnansis.China Journal of Chinese Materia Medica, 2007, 32(32):1886-1890.
T5S1959	Asarinin	Sesamin;Fagarol;Pseudocubebin;Episesamin;Eleutheroside B4	细辛脂素	细辛	清肺排毒汤	133-04-0	Lignans	C1Oc2ccc(cc2O1)[C@H]1OC[C@@H]2[C@H]1CO[C@H]2c1ccc2OCOc2c1	C20H18O6	354.35	Microbiology&Virology	antibacterial	antibacterial	1. (-)-Asarinin shows antibacterial activity.	Lili Z , Zhenzhong G , Jingkui Z . Experimental study of the effects of Asarinin on immunosuppression activity in vitro[J]. Chinese Journal of Cardiology, 2003, 31.
T5S0788	Oroxin A	Baicalein 7-O-glucoside	木蝴蝶苷A	黄芩	痰热清注射液；小柴胡汤；清肺达原颗粒（肺炎1号）；清肺排毒汤；透解祛瘟颗粒；金花清感颗粒	57396-78-8	Flavonoid	OC[C@H]1O[C@@H](Oc2cc3oc(cc(=O)c3c(O)c2O)-c2ccccc2)[C@H](O)[C@@H](O)[C@@H]1O	C21H20O10	432.38	Others	Others	Others	Oroxin A has antitussive and expectorant effects.	He J , Du L , Bao M , et al. Oroxin A inhibits breast cancer cell growth by inducing robust endoplasmic reticulum stress and senescence[J]. Anti-Cancer Drugs, 2016, 27(3):204-215.
T6S0105	Peiminine	Raddeanine;Verticinone;Zhebeinone;Fritillarine	贝母素乙	浙贝母	金花清感颗粒	18059-10-4	Alkaloids	C[C@H]1CC[C@@H]2N(C1)C[C@H]1[C@@H]3C[C@H]4[C@@H](CC(=O)[C@H]5C[C@@H](O)CC[C@]45C)[C@@H]3CC[C@@H]1[C@]2(C)O	C27H43NO3	429.64	Autophagy	Others	Others	1. Peiminine is an effective inhibitor for lung inflammation and pulmonary fibrosis in a rat model of bleomycin-induced lung injury.	Antiallergic effects of peiminine through the regulation of inflammatory mediators in HMC-1 cells[J]. Immunopharmacology and Immunotoxicology, 2015, 37(4):1-8.
T5S0384	Rhaponiticin	Rhapontin;Ponticin;Rhaponticin;Rhapontigenin glucoside	土大黄苷	大黄	连花清瘟胶囊	155-58-8	Phenols	COc1ccc(\C=C\c2cc(O)cc(O[C@@H]3O[C@H](CO)[C@@H](O)[C@H](O)[C@H]3O)c2)cc1O	C21H24O9	420.41	Others	Others	Others	1. Rhaponticin(Rhaponiticin) can alleviate liver steatosis and improve blood glucose and lipid profiles in KK/Ay diabetic mice, indicates that rhaponticin has a noticeable antidiabetic effect and could be potentially used as a new agent to treat type 2 diabetes mellitus and its complications.	Chen J , Ma M , Lu Y , et al. Rhaponticin from Rhubarb Rhizomes Alleviates Liver Steatosis and Improves Blood Glucose and Lipid Profiles in KK/Ay Diabetic Mice[J]. Planta medica, 2009, 75(5).
T5S1025	Picfeltarraenin IA	Picfeltarraenin A	苦玄参苷IA	玄参	透解祛瘟颗粒	97230-47-2	Triterpenoids	CC(C)C1=CC(=O)[C@@](C)(O1)[C@H]1[C@H](O)C[C@@]2(C)[C@@H]3CC=C4[C@@H](CC[C@@H](O[C@@H]5OC[C@@H](O)[C@H](O)[C@H]5O[C@@H]5O[C@@H](C)[C@H](O)[C@@H](O)[C@H]5O)C4(C)C)[C@]3(C)C(=O)C[C@]12C	C41H62O13	762.93	Neuroscience	AChR	AChE	1. Picfeltarraenin IA, IB, IV, X, XI are stronger AChE inhibitions than the known AChE inhibitor Tacrine.	Shi R , Wang Q , Ouyang Y , et al. Picfeltarraenin IA inhibits lipopolysaccharide-induced inflammatory cytokine production by the nuclear factor-ÎºB pathway in human pulmonary epithelial A549 cells[J]. Oncology Letters, 2016, 11(2):1195-1200.
T2835	Morin	Al-Morin;Aurantica;Calico Yellow;Toxylon pomiferum	桑色素	人参	小柴胡汤	480-16-0	Phenols	Oc1cc(O)c2c(=O)c(O)c(c3c(O)cc(O)cc3)oc2c1	C15H10O7	302.23	Others	Others inhibitor	Others	Morin was found to be a weak inhibitor of fatty acid synthase (IC50: 2.33 μM). Morin is a yellow color substance that can be isolated from Maclura pomifera (Osage orange), Maclura tinctoria (old fustic) and from leaves of Psidium guajava (common guava).	Tian, WX. Current Medicinal Chemistry, 2006, 13 (8): 967–977.
T6S1930	Schisanhenol	Gomisin-K3;Schizanhenol	五味子酚	五味子	生脉注射液	69363-14-0	Lignans	COc1cc2C[C@H](C)[C@H](C)Cc3cc(OC)c(OC)c(OC)c3-c2c(O)c1OC	C23H30O6	402.48	oxidation-reduction	Antioxidant	Antioxidant	1. Schisanhenol can protect against adriamycin induced heart mitochondrial toxicity. 2. Schisanhenol has antioxidative effect on human LDL oxidation, may be through scavenging free radicals. 3. Schisanhenol has anti-apoptosis effect on BACSs, may be related to its inhibition of ROS generation.	Wang Q Y , Deng L L , Liu J J , et al. Schisanhenol derivatives and their biological evaluation against tobacco mosaic virus (TMV)[J]. Fitoterapia, 2015, 101(Complete):117-124.
T3374	Dihydrotanshinone I	15,16-dihydrotanshinone I;DHTS	二氢丹参酮I	丹参	血必净注射液	87205-99-0	Diterpenoids	C[C@H]1COC2=C1C(=O)C(=O)c1c2ccc2c(C)cccc12	C18H14O3	278.31	Immunology/Inflammation	ROS inhibitor	ROS	Dihydrotanshinone I is a natural compound extracted from Salvia miltiorrhiza Bunge used for treating of cardiovascular diseases.	Wei, Y., Xu, M., Ren, Y., Lu, G., Xu, Y., Song, Y., & Ji, H. (2016). The cardioprotection of dihydrotanshinone I against myocardial ischemia–reperfusion injury via inhibition of arachidonic acid ω-hydroxylase. Canadian Journal Of Physiology And Pharmacology, 94(12), 1267-1275. doi: 10.1139/cjpp-2016-0036
TCS1704	Artemetin	Artemisetin;Erianthin	艾黄素	青蒿	热毒宁注射液；透解祛瘟颗粒；金花清感颗粒	479-90-3	Flavonoid	COC1=C(C=C(C=C1)C2=C(C(=O)C3=C(C(=C(C=C3O2)OC)OC)O)OC)OC	C20H20O8	388.37	Immunology/Inflammation;oxidation-reduction	Antioxidant	Antioxidant	1. Artemetin has anti-inflammatory activity. 2. Artemetin protects endothelial function by acting as antioxidant and antiapoptotic agent and through the activation of ERK1/2 and Akt. 3. Intravenous injection of Artemetin (.75 mg/kg) significantly reduces the hypertensive response to angiotensin I while increases the average length of bradykinin-induced hypotension.	Grossini E , Marotta P , Farruggio S , et al. Effects of Artemetin on Nitric Oxide Release and Protection against Peroxidative Injuries in Porcine Coronary Artery Endothelial Cells[J]. Phytotherapy Research, 2015, 29(9):1339-1348.
T4S0867	Pogostone	DHELWANGIN	广藿香酮	广藿香	连花清瘟胶囊	23800-56-8	Miscellaneous	CC(C)CCC(=O)c1c(O)cc(C)oc1=O	C12H16O4	224.25	Microbiology&virology	Antibacterial	Antibacterial	1. Pogostone possesses potent anti-bacterial and anti-fungal activities, such as gram negative bacteria , gram positive bacteria, Escherichia coli. 2. Pogostone exhibits an immunosuppressive property by directly blocking T cell proliferation as well as altering inflammatory cytokine profile. 3. Pogostone could exert a gastro-protective effect against gastric ulceration, and the underlying mechani…	Immunosuppressive activity of pogostone on T cells: Blocking proliferation via S phase arrest[J]. International Immunopharmacology, 2015, 26(2):328-337.
T2995	Chrysophanic Acid	Chrysophanol;Turkey Rhubarb;3-Methylchrysazin	大黄酚	大黄	连花清瘟胶囊	481-74-3	Phenols	Cc1cc(O)c2C(=O)c3c(O)cccc3C(=O)c2c1	C15H10O4	254.24	Angiogenesis; JAK/STAT signaling; Tyrosine Kinase/Adaptors	EGFR inhibitor	EGFR	Chrysophanic acid is an EGFR/mTOR pathway inhibitor, which can be found in rhubarb, and sorrel.	Lee MS, et al. Phytother Res, 2011, 25(6), 833-837.
T2763	Panaxadiol	20(R)-Panaxadiol	人参二醇	人参	小柴胡汤	19666-76-3	Terpenoids	O[C@H]1[C@H]2[C@]([C@]3([C@@H]([C@@]4([C@@H](CC3)C([C@@H](O)CC4)(C)C)C)C1)C)(CC[C@@H]2[C@@]1(OC(CCC1)(C)C)C)C	C30H52O3	460.73	Others	Others	Others	Panaxadiol is a novel antitumor agent extracted from the Chinese medical herb Panax ginseng.	Lin X, et al. Exp Hematol. 2015 May;43(5):364-73.
T3376	Cynaroside	Luteolin 7-O-β-D-glucoside;Luteolin 7-glucoside;Luteoloside;Luteolin 7-β-D-Glucopyranoside;Luteolin 7-O-Glucoside	朝蓟糖甙	金银花	连花清瘟胶囊；热毒宁注射液；痰热清注射液；透解祛瘟颗粒；透解祛瘟颗粒；金花清感颗粒	5373-11-5	Glycosides	C1=CC(=C(C=C1C2=CC(=O)C3=C(C=C(C=C3O2)O[C@H]4[C@@H]([C@H]([C@@H]([C@H](O4)CO)O)O)O)O)O)O	C21H20O11	448.38	Others	Others	Others	Cynaroside is a flavone, a flavonoid-like chemical compound. It has an anti-oxidant effect, inhibiting lipid and protein oxidation.	Hu W, et al. Effects of ultrahigh pressure extraction on yield and antioxidant activity of chlorogenic acid and cynaroside extracted from flower buds of Lonicera japonica. Chin J Nat Med. 2015 Jun;13(6):445-53.
T3924	Astragaloside II	Astrasieversianin VIII	黄芪皂苷 II	黄芪	透解祛瘟颗粒	84676-89-1	Triterpenoids	C(=O)(C)O[C@H]1[C@@H](OC[C@H]([C@@H]1O)O)O[C@H]1CC[C@]23C4(CC[C@]5([C@]([C@@H]4C[C@@H]([C@H]2C1(C)C)O[C@H]1[C@@H]([C@H]([C@@H]([C@H](O1)CO)O)O)O)(C[C@@H]([C@@H]5[C@@]1(O[C@@H](CC1)C(C)(C)O)C)O)C)C)C3	C41H66O15	798.95	Stem Cells	TGF-beta/Smad inhibitor	Smad1; Smad5; Smad8	Astragaloside II is an effective MDR reversal agent and may be a potential adjunctive agent for hepatic cancer chemotherapy. Astragaloside II also induces osteogenic activities, differentiation, proliferation, and mineralization, through the bone morphogenetic protein-2/MAPK and Smad1/5/8 pathways.	Huang C, et al. Reversal of P-glycoprotein-mediated multidrug resistance of human hepatic cancer cells by Astragaloside II. J Pharm Pharmacol. 2012 Dec;64(12):1741-50.
T3776	Rhapontigenin	Protigenin	丹叶大黄素	大黄	连花清瘟胶囊	500-65-2	Phenols	COc1ccc(\C=C\c2cc(O)cc(O)c2)cc1O	C15H14O4	258.3	Metabolism	P450 inhibitor	CYP1A1	Rhapontigenin is a mechanism-based, selective inactivator of cytochrome P450 1A1 (IC50: 400 nM), an aryl hydrocarbon hydroxylase which activates polycyclic aromatic hydrocarbons that act as procarcinogens. Rhapontigenin is a natural analog of resveratrol with antioxidant and anti-cancer activity. At higher concentrations, rhapontigenin inhibits the proliferation of HL-60R and HepG2 cancer cell li…	Jo SP1, Kim JK2, Lim YH1. Antihyperlipidemic effects of rhapontin and rhapontigenin from rheum undulatum in rats fed a high-cholesterol diet.Planta Med. 2014 Aug;80(13):1067-71.
T2913	Schisantherin A	Schizantherin-A;Wuweizi ester-A;Gomisin-C;Schisanwilsonin H;Arisanschinin K	五味子酯甲	五味子	生脉注射液	58546-56-8	Phenylpropanoids	C[C@@]1([C@H](Cc2cc3c(c(c2c2c(cc(c(c2OC)OC)OC)[C@@H]1OC(=O)c1ccccc1)OC)OCO3)C)O	C30H32O9	536.57	NF-κB	NF-κB	NF-κB	Schisantherin A is a dibenzocyclooctadiene lignan isolated from the fruit of Schisandra sphenanthera, has been used as an antitussive, tonic, and sedative agent.	Zhou E, et al. Int Immunopharmacol. 2014 Sep;22(1):133-40.
T2926	Schizandrin A	Deoxyschizandrin;Wuweizisu-A;Schisandrin A	五味子素A	五味子	生脉注射液	61281-38-7	Phenylpropanoids	C[C@@H]1Cc2cc(c(c(c2c2c(c(c(cc2C[C@@H]1C)OC)OC)OC)OC)OC)OC	C24H32O6	416.51	Metabolism	P450	CYP3A	Schisandrin A is a main effective components extracted from the oriental medicine Schisandra chinensis, inhibits CYP3A activity with an IC50 of 6.60 μM and Ki of 5.83 μM, respectively.	Wang CP, et al. J Physiol Biochem. 2014 Sep;70(3):735-47.
T6718	Vanillylacetone	Gingerone;Zingerone;NSC 15335	姜酮	生姜	小柴胡汤；清肺排毒汤	122-48-5	Ketone	CC(=O)CCc1cc(c(cc1)O)OC	C11H14O3	194.23	NF-Κb	NF-κB	NF-κB	Zingerone (Vanillylacetone) is a nontoxic methoxyphenol isolated from Zingiber officinale, with potent anti-inflammatory, antidiabetic, antilipolytic, antidiarrhoeic, antispasmodic and anti-tumor properties. Zingerone alleviates oxidative stress and inflammation, down-regulates NF-κB mediated signaling pathways. Zingerone acts as an anti-mitotic agent, and inhibits the growth of neuroblastoma cel…	Chen JC, et al. J Agric Food Chem, 2007, 55(21), 8390-8397.
T6473	Dioscin	CCRIS 4123;Collettiside III;Saponin	薯蓣皂苷	山药	清肺排毒汤	19057-60-4	Steroids	C[C@H]1[C@H]2[C@H](C[C@H]3[C@@H]4CC=C5C[C@H](CC[C@]5(C)[C@H]4CC[C@]23C)O[C@@H]2O[C@H](CO)[C@@H](O[C@@H]3O[C@@H](C)[C@H](O)[C@@H](O)[C@H]3O)[C@H](O)[C@H]2O[C@@H]2O[C@@H](C)[C@H](O)[C@@H](O)[C@H]2O)O[C@]11CC[C@@H](C)CO1	C45H72O16	869.04	Autophagy	Autophagy	Autophagy	Dioscin is a saponin with antitumor activities.	Wang Z, et al. Biol Pharm Bull, 2001, 24(2), 159-162.
T3327	Arteether	(+)-Arteether;Artemotil;β-Arteether;Beta-Arteether;SM-227	蒿乙醚	青蒿	热毒宁注射液；透解祛瘟颗粒；金花清感颗粒	75887-54-6	Others	CCO[C@H]1O[C@@H]2O[C@@]3(C)CC[C@H]4[C@H](C)CC[C@@H]([C@H]1C)[C@@]24OO3	C17H28O5	312.4	Autophagy; Immunology/Inflammation; GPCR/G Protein; Microbiology&Virology	CCR inhibitor; CXCR	CCL4; CCL5; CXCL10; CXCL9	Arteether is a new, fast-acting antimalarial drug.	Dwivedi H, et al. Parasitology. 2016, 143(12):1557-68.
T6169	Indirubin	Indigo red;Indigopurpurin;Couroupitine B;NSC 105327	化合物Indirubin	大青叶	透解祛瘟颗粒	479-41-4	Others	O=C1Nc2ccccc2\C1=C1/Nc2ccccc2C1=O	C16H10N2O2	262.26	PI3K/Akt/mTOR Signaling	CDK inhibitor; GSK-3 inhibitor; Raf inhibitor	GSK-3β , CDK2/CyclinA , CDK5/p35 , CDK1/CyclinB , C-Raf	Indirubin is a potent cyclin-dependent kinases and GSK-3β inhibitor with IC50 of about 5 uM and 0.6 uM.	Hoessel R, et al. Nat Cell Biol, 1999, 1(1), 60-67.
T2873	Ginsenoside Rg2	Panaxoside Rg2;Prosapogenin C2;Chikusetsusaponin I;(20S)Ginsenoside Rg2	人参皂苷Rg2	人参	小柴胡汤	52286-74-5	Glycosides	C[C@@H]1O[C@@H](O[C@@H]2[C@@H](O)[C@H](O)[C@@H](CO)O[C@H]2O[C@H]2C[C@]3(C)[C@H](C[C@@H](O)[C@@H]4[C@H](CC[C@@]34C)[C@@](C)(O)CC\C=C(/C)C)[C@@]3(C)CC[C@H](O)C(C)(C)[C@H]23)[C@H](O)[C@H](O)[C@H]1O	C42H72O13	785.01	PI3K/Akt/mTOR signaling; Stem Cells	GSK-3 antagonist	GSK-3β	Ginsenoside Rg2 is one of the major active components of ginseng, act as an NF-κB inhibitor.	Cho YS, et al. Korean J Physiol Pharmacol. 2013 Apr;17(2):133-7.
T5S1891	Acetylaconitine	3-Acetylaconitine;Flaconitine	乙酰乌头碱	附子	参附注射液	77181-26-1	Alkaloids	CCN1C[C@@]2(COC)[C@H]3[C@@H](OC)[C@H]4C1[C@@]3([C@@H]1C[C@@]3(O)[C@H](OC(=O)c5ccccc5)[C@@H]1[C@]4(OC(C)=O)[C@@H](O)[C@@H]3OC)[C@H](C[C@H]2OC(C)=O)OC	C36H49NO12	687.77	Others	Others	Others	Analgesic activity.	Wang Y , Zhang J , Tian H , et al. [Study on processing principle of Aconitum pendulum].[J]. China Journal of Chinese Materia Medica, 2010, 35(5):588-592.
T2P2898	Neodiosmin	Diosmetin-7-neohesperidoside;Diosmetin-7-O-neohesperidoside	新地奥斯明	枳实	清肺排毒汤	38665-01-9	Ketone	COc1ccc(cc1O)-c1cc(=O)c2c(O)cc(O[C@@H]3O[C@H](CO)[C@@H](O)[C@H](O)[C@H]3O[C@@H]3O[C@@H](C)[C@H](O)[C@@H](O)[C@H]3O)cc2o1	C28H32O15	608.54	oxidation-reduction	Antioxidant	Antioxidant	1. Neodiosmin has poor aqueous solubility but exerts a good debittering effect and is a strong antioxidant with potential applications in foods, beverages, and pharmaceutical preparations.	Mencherini T , Campone L , Piccinelli A L , et al. HPLC-PDA-MS and NMR Characterization of a Hydroalcoholic Extract of Citrus aurantium L. var.\r, amara\r, Peel with Antiedematogenic Activity[J]. Journal of Agricultural and Food Chemistry, 2013, 61(8):1686-1693.
T5S0246	Pseudoprotodioscin		伪原薯蓣皂苷	山药	清肺排毒汤	102115-79-7	Steroids	C[C@H](CCC1=C(C)[C@H]2[C@H](C[C@H]3[C@@H]4CC=C5C[C@H](CC[C@]5(C)[C@H]4CC[C@]23C)O[C@@H]2O[C@H](CO)[C@@H](O[C@@H]3O[C@@H](C)[C@H](O)[C@@H](O)[C@H]3O)[C@H](O)[C@H]2O[C@@H]2O[C@@H](C)[C@H](O)[C@@H](O)[C@H]2O)O1)CO[C@@H]1O[C@H](CO)[C@@H](O)[C@H](O)[C@H]1O	C51H82O21	1031.2	Others	Others	Others	1. Pseudoprotodioscin has moderate cytotoxicity.	Kawabata T , Cui M Y , Hasegawa T , et al. Anti-Inflammatory and Anti-Melanogenic Steroidal Saponin Glycosides from Fenugreek (\r, Trigonella foenum-graecum\r, L.) Seeds[J]. Planta Medica, 2011, 77(07):705-710.
T2814	Cryptotanshinone	Tanshinone c;Cryptotanshinon	隐丹参醌	丹参	血必净注射液	35825-57-1	Terpenoids	c12c(C(CCC1)(C)C)ccc1c2C(=O)C(=O)C2=C1OC[C@@H]2C	C19H20O3	296.37	JAK/STAT signaling; Stem Cells	STAT inhibitor	STAT3	Cryptotanshinone, a STAT3 inhibitor (IC50: 4.6 μM) in a cell-free assay, strongly inhibits phosphorylation of STAT3 Tyr705, with a little effect on STAT3 Ser727, but no inhibition for STAT1 nor STAT5.	Shin DS, et al. Cancer Res, 2009, 69(1), 193-202.
T3227	Danshensu	Salvianic acid A;Dan shen suan A	丹参素	丹参	血必净注射液	76822-21-4	Others	c1cc(c(cc1C[C@H](C(=O)O)O)O)O	C9H10O5	198.17	Others	Others	Others	Danshensu is an active ingredient of Salvia miltiorrhiza with wide cardiovascular benefit.	Li H, et al. PLoS One. 2012;7(11):e48872.
T3600	Licochalcone A		甘草查尔酮A	甘草	连花清瘟胶囊；小柴胡汤	58749-22-7	Chalcones	CC(C)(C=C)c1c(cc(c(c1)/C=C/C(=O)c1ccc(cc1)O)OC)O	C21H22O4	338.4	Apoptosis;Proteases/Proteasome;Metabolism	Caspase inhibitor;UGT	Caspase-3;UGT1A1	Licochalcone A is a flavonoid isolated from the famous Chinese medicinal herb Glycyrrhiza uralensis Fisch with obvious anti-cancer effects.	Chen M, et al. Antimicrob Agents Chemother. 1993, 37(12), 2550-2556.
T3916	Ginsenoside F2		人参皂苷F2	人参	小柴胡汤	62025-49-4	Triterpenoids	C\C(C)=C/CC[C@](C)(O[C@@H]1O[C@H](CO)[C@@H](O)[C@H](O)[C@H]1O)[C@H]1CC[C@]2(C)[C@@H]1[C@H](O)C[C@@H]1[C@@]3(C)CC[C@H](O[C@@H]4O[C@H](CO)[C@@H](O)[C@H](O)[C@H]4O)C(C)(C)[C@@H]3CC[C@@]21C	C42H72O13	785.03	Apoptosis	Apoptosis inducer activator	Apoptosis inducer	Ginsenoside F2 has antiproliferative activity against breast cancer stem cells (CSCs). It induces apoptosis in breast CSCs by activating the intrinsic apoptotic pathway and mitochondrial dysfunction.	Siraj FM1, SathishKumar N, Kim YJ, Kim SY, Yang DC.Ginsenoside F2 possesses anti-obesity activity via binding with PPARγ and inhibiting adipocyte differentiation in the 3T3-L1 cell line.J Enzyme Inhib Med Chem. 2015 Feb;30(1):9-14.
T3779	Crocin II	Crocin B;Crocetin gentiobiosylglucosyl ester;Tricrocin;Crocin 2	西红花苷II	红花	血必净注射液	55750-84-0	Diterpenoids	CC(\C=C\C=C(/C)C(=O)O[C@@H]1O[C@H](CO)[C@@H](O)[C@H](O)[C@H]1O)=C/C=C/C=C(C)/C=C/C=C(\C)C(=O)O[C@@H]1O[C@H](CO[C@@H]2O[C@H](CO)[C@@H](O)[C@H](O)[C@H]2O)[C@@H](O)[C@@H](O)[C@H]1O	C38H54O19	814.83	Others	Others inhibitor	Others	Crocin has anti-inflammatory and anti-apoptotic effects against gastric ischemia-reperfusion injury in rats, the effect of crocin is mainly mediated by reducing the protein expression of iNOS and caspase-3. Crocin can ameliorate CCl4-induced liver injury via inhibition of inflammatory cytokines, caspase3 and oxidative stress along with modulation of liver metabolizing enzymes favoring elimination…	Lee IA,et al. Antihyperlipidemic effect of crocin isolated from the fructus of Gardenia jasminoides and its metabolite Crocetin. Biol Pharm Bull. 2005 Nov;28(11):2106-10.
T3920	Pseudoginsenoside F11	Ginsenoside A1	拟人参皂苷F11	人参	小柴胡汤	69884-00-0	Triterpenoids	O1[C@H]([C@@H]([C@@H]([C@H]([C@@H]1C)O)O)O)O[C@H]1[C@@H](O[C@@H]([C@H]([C@@H]1O)O)CO)O[C@@H]1[C@H]2C([C@H](CC[C@@]2([C@@H]2[C@@](C1)([C@@]1(CC[C@@H]([C@H]1[C@@H](C2)O)[C@]1(O[C@H](CC1)C(C)(C)O)C)C)C)C)O)(C)C	C42H72O14	801.01	Others	Others	Others	Pseudoginsenoside-F11 is a component of Panax quinquefolium (American ginseng), can antagonize the learning and memory deficits induced by scopolamine, morphine, and methamphetamine in mice.	Wang H, et al. The pseudoginsenoside F11 ameliorates cisplatin-induced nephrotoxicity without compromising its anti-tumor activity in vivo. Scientific Reports [2014, 4:41986]
T2768	Saikosaponin A		柴胡皂苷A	柴胡	小柴胡汤；清肺达原颗粒（肺炎1号）；清肺排毒汤；透解祛瘟颗粒	20736-09-8	Terpenoids	C[C@H]1O[C@@H](O[C@H]2CC[C@@]3(C)[C@@H](CC[C@]4(C)[C@@H]3C=C[C@]35OC[C@@]6(CCC(C)(C)C[C@@H]36)[C@@H](O)C[C@@]45C)[C@]2(C)CO)[C@H](O)[C@@H](O[C@@H]2O[C@H](CO)[C@@H](O)[C@H](O)[C@H]2O)[C@H]1O	C42H68O13	780.99	NF-Κb	NF-κB inhibitor	NF-κB	Saikosaponin A has a variety of pharmacological benefits, including antiepileptic, anti-osteoporosis, antioxidant, anti-inﬂammatory, immunomodulatory, and anti-bacterial activities. It can effectively attenuate neuropathic pain in CCI rats by inhibiting the activation of p38 MAPK and NF-κB signaling pathways in spinal cord. It can inhibit NMDA receptor current and persistent sodium current, and i…	Zhao H, et al. Exp Ther Med. 2015 Aug;10(2):823-827.
T3395	Timosaponin AIII	Timosaponin A3;Filiferin B;AneMarsaponin A3	知母皂苷 A-III	知母	清肺达原颗粒（肺炎1号）	41059-79-4	Steroids	C[C@H]1[C@H]2[C@H](C[C@H]3[C@@H]4CC[C@@H]5C[C@H](CC[C@]5(C)[C@H]4CC[C@]23C)O[C@@H]2O[C@H](CO)[C@H](O)[C@H](O)[C@H]2O[C@@H]2O[C@H](CO)[C@@H](O)[C@H](O)[C@H]2O)O[C@]11CCC(C)CO1	C39H64O13	740.92	PI3K/Akt/mTOR signaling	mTOR inhibitor	mTORC1	Timosaponin AIII induces autophagy in HeLa cells followed by apoptotic cell death (IC50: 10 μM). The Timosaponin AIII cellular response is mediated via inhibition of mTORC1 and induction of ER stress (IC50: 2.5 μM, BT474 cells; 6 μM, MDAMB231). The Timosaponin AIII pro-apoptotic response is selective for tumor cells over normal cells but autophagy is induced in both.	Wu ZT, et al. Acta Pharmacol Sin. 2014 Sep;35(9):1188-98.
T3915	Ginsenoside Ro	Chikusetsusaponin 5;Chikusetsusaponin V;Polysciasaponin P3	人参皂苷Ro	人参	小柴胡汤	34367-04-9	Triterpenoids	O1[C@@H]([C@H]([C@@H]([C@H]([C@@H]1O[C@H]1CC[C@]2([C@H](C1(C)C)CC[C@]1([C@@]3(CC[C@]4(CCC(C[C@H]4C3=CC[C@H]21)(C)C)C(=O)O[C@@H]1O[C@@H]([C@H]([C@@H]([C@H]1O)O)O)CO)C)C)C)O[C@@H]1O[C@@H]([C@H]([C@@H]([C@H]1O)O)O)CO)O)O)C(=O)O	C48H76O19	957.11	Endocrinology/Hormones; Enzyme	Reductase inhibitor	5-α reductase	GinsenosideRo exhibits a Ca2+-antagonistic antiplatelet effect.	Kang HJ, et al. Antioxidative properties of ginsenoside Ro against UV-B-induced oxidative stress in human dermal fibroblasts. Biosci Biotechnol Biochem. 2015 Jul 27:1-4.
T3863	Chikusetsusaponin IVa	Calenduloside F	竹节参皂苷IVa	人参	小柴胡汤	51415-02-2	Triterpenoids	C[C@]12CC[C@@H](C([C@@H]1CC[C@@]1([C@@H]2CC=C2[C@]1(CC[C@@]1([C@H]2CC(CC1)(C)C)C(=O)O[C@H]1[C@@H]([C@H]([C@@H]([C@H](O1)CO)O)O)O)C)C)(C)C)O[C@H]1[C@@H]([C@H]([C@@H]([C@H](O1)C(=O)O)O)O)O	C42H66O14	794.98	PI3K/Akt/mTOR signaling	AMPK activator	AMPK	Chikusetsusaponin IVa is a novel AMPK activator, can induce insulin secretion from βTC3 cells via GPR4 mediated calcium and PKC pathways, may be developed into a new potential for therapeutic agent used in T2DM patients.	Li Y, ET AL. Chikusetsu saponin IVa regulates glucose uptake and fatty acid oxidation: implications in antihyperglycemic and hypolipidemic effects. J Pharm Pharmacol. 2015 Jul;67(7):997-1007.
T3913	Saikosaponin D		柴胡皂苷D	柴胡	小柴胡汤；清肺达原颗粒（肺炎1号）；清肺排毒汤；透解祛瘟颗粒	20874-52-6	Triterpenoids	C[C@H]1O[C@@H](O[C@H]2CC[C@@]3(C)[C@@H](CC[C@]4(C)[C@@H]3C=C[C@]35OC[C@@]6(CCC(C)(C)C[C@@H]36)[C@H](O)C[C@@]45C)[C@]2(C)CO)[C@H](O)[C@@H](O[C@@H]2O[C@H](CO)[C@@H](O)[C@H](O)[C@H]2O)[C@H]1O	C42H68O13	780.98	JAK/STAT signaling; NF-Κb; Stem Cells	NF-κB inhibitor; STAT inhibitor	NF-κB; STAT3	Saikosaponin D is a novel SERCA inhibitor by inhibiting NF-κB and STAT3 signaling to protect against acetaminophen-induced hepatotoxicity.	Liu RY1, Li JP.Saikosaponin-d inhibits proliferation of human undifferentiated thyroid carcinoma cells through induction of apoptosis and cell cycle arrest.Eur Rev Med Pharmacol Sci. 2014;18(17):2435-43.
T3810	Saikosaponin B2		柴胡皂甙 B2	柴胡	小柴胡汤；清肺达原颗粒（肺炎1号）；清肺排毒汤；透解祛瘟颗粒	58316-41-9	Triterpenoids	C[C@H]1O[C@@H](O[C@H]2CC[C@@]3(C)[C@@H](CC[C@]4(C)[C@@H]3C=CC3=C5CC(C)(C)CC[C@]5(CO)[C@H](O)C[C@@]43C)[C@]2(C)CO)[C@H](O)[C@@H](O[C@@H]2O[C@H](CO)[C@@H](O)[C@H](O)[C@H]2O)[C@H]1O	C42H68O13	780.99	Others	Others inhibitor	Others	Saikosaponin B2 acts on HCV E2 and inhibits infection by several genotypic strains and prevents binding of serum-derived HCV onto hepatoma cells. Saikosaponin B2 (5 μM) induces differentiation of B16 melanoma cells, with potentiation of expressions of tyrosinase and melanogenesis.	Lin LT,et al. Saikosaponin b2 is a naturally occurring terpenoid that efficiently inhibits hepatitis C virus entry. J Hepatol. 2015 Mar;62(3):541-8. doi: 10.
T3903	Angoroside C		安格洛苷C	玄参	透解祛瘟颗粒	115909-22-3	Phenylpropanoids	C(=O)(/C=C/c1cc(c(cc1)O)OC)O[C@@H]1[C@H](O[C@H]([C@@H]([C@H]1O[C@@H]1O[C@H]([C@@H]([C@H]([C@H]1O)O)O)C)O)OCCc1cc(c(cc1)OC)O)CO[C@@H]1OC[C@@H]([C@@H]([C@H]1O)O)O	C36H48O19	784.75	GPCR/G Protein	Prostaglandin Receptor inhibitor	PGE2	Angoroside C is a Potential anti-inflammatory compound. Inhibitor of prostaglandin E2 release in mouse peritoneal macrophages in vitro. Shows potent antioxidative activity in reducing the oxidized OH adducts of dAMP and dGMP. Reveals some trypanocidal potential.	Díaz AM1, Abad MJ, Fernández L,et al.Phenylpropanoid glycosides from Scrophularia scorodonia: in vitro anti-inflammatory activity.Life Sci. 2004 Apr 2;74(20):2515-26.
T3388	Calycosin-7-O-beta-D-glucoside	Calycosin-7-O-β-D-glucoside;calycosin-7-O-beta-D-glucopyranoside	毛蕊异黄酮苷	黄芪	透解祛瘟颗粒	20633-67-4	Flavonoid	COc1c(cc(cc1)c1coc2c(c1=O)ccc(c2)O[C@H]1[C@@H]([C@H]([C@@H]([C@H](O1)CO)O)O)O)O	C22H22O10	446.4	Proteases/Proteasome	MMP inhibitor	MMP-2; MMP-9	Calycosin 7-O-β-D-glucopyranoside possesses a protective effect on rat hepatocytes, an inhibitory effect on COX-2 activity. Calycosin 7-O-β-D-glucoside has antimicrobial activity. Calycosin 7-O-β-D-glucoside is a promising anti-HIV agent. It shows scavenging activity to DPPH radicals and superoxide anion. Calycosin 7-O-β-D-glucopyranoside possesses an alleviating effect on osteoarthritis and can …	Fu S, et al. J Ethnopharmacol. 2014 Aug 8;155(1):692-701.
T3319	Scutellarein	4',5,6,7-Tetrahydroxyflavone;6-Hydroxyapigenin	野黄芩素	广藿香	连花清瘟胶囊	529-53-3	Flavonoid	c1cc(ccc1c1cc(=O)c2c(c(c(cc2o1)O)O)O)O	C15H10O6	286.24	Angiogenesis	Src inhibitor	Src	Scutellarein reduces inflammatory responses by inhibiting Src kinase activity.	Sung NY, et al. Korean J Physiol Pharmacol. 2015 Sep;19(5):441-9.
T2878	Ginsenoside Rd	Gypenoside VIII;Panaxoside Rd;Sanchinoside Rd	人参皂苷Rd	人参	小柴胡汤	52705-93-8	Glycosides	C\C(C)=C/CC[C@](C)(O[C@@H]1O[C@H](CO)[C@@H](O)[C@H](O)[C@H]1O)[C@H]1CC[C@]2(C)[C@@H]1[C@H](O)C[C@@H]1[C@@]3(C)CC[C@H](O[C@@H]4O[C@H](CO)[C@@H](O)[C@H](O)[C@H]4O[C@@H]4O[C@H](CO)[C@@H](O)[C@H](O)[C@H]4O)C(C)(C)[C@@H]3CC[C@@]21C	C48H82O18	947.15	Immunology/Inflammation; Membrane Transporter/Ion Channel; Metabolism; NF-κB	Calcium Channel; COX; P450; NF-κB	Calcium Channel; COX; P450; NF-κB	Ginsenoside Rd may have properties that inhibit or prevent the growth of tumors.	Wang B, et al. Neural Regen Res. 2014 Sep 15;9(18):1678-87.
T3812	20(R)-Propanaxadiol	(20R)Ginsenoside Rg3;20(R)-Ginsenoside Rg3	人参皂甙 RG3	人参	小柴胡汤	38243-03-7	Triterpenoids	C\C(C)=C/CC[C@@](C)(O)[C@H]1CC[C@]2(C)[C@@H]1[C@H](O)C[C@@H]1[C@@]3(C)CC[C@H](O[C@@H]4O[C@H](CO)[C@@H](O)[C@H](O)[C@H]4O[C@@H]4O[C@H](CO)[C@@H](O)[C@H](O)[C@H]4O)C(C)(C)[C@@H]3CC[C@@]21C	C42H72O13	785.02	Others	Others	Others	20(R)-Propanaxadiol is a compound with anti-aging and antifatigue activities.	Bae EA,et al. Metabolism of 20(S)- and 20(R)-ginsenoside Rg3 by human intestinal bacteria and its relation to in vitro biological activities. Biol Pharm Bull. 2002 Jan;25(1):58-63.
T3920	Pseudoginsenoside F11	Ginsenoside A1	拟人参皂苷F11	人参	小柴胡汤	69884-00-0	Triterpenoids	O1[C@H]([C@@H]([C@@H]([C@H]([C@@H]1C)O)O)O)O[C@H]1[C@@H](O[C@@H]([C@H]([C@@H]1O)O)CO)O[C@@H]1[C@H]2C([C@H](CC[C@@]2([C@@H]2[C@@](C1)([C@@]1(CC[C@@H]([C@H]1[C@@H](C2)O)[C@]1(O[C@H](CC1)C(C)(C)O)C)C)C)C)O)(C)C	C42H72O14	801.01	Others	Others	Others	Pseudoginsenoside-F11 is a component of Panax quinquefolium (American ginseng), can antagonize the learning and memory deficits induced by scopolamine, morphine, and methamphetamine in mice.	Wang H, et al. The pseudoginsenoside F11 ameliorates cisplatin-induced nephrotoxicity without compromising its anti-tumor activity in vivo. Scientific Reports [2014, 4:41986]
T2933	Wogonin	Vogonin	汉黄芩素	黄芩	痰热清注射液；小柴胡汤；清肺达原颗粒（肺炎1号）；清肺排毒汤；透解祛瘟颗粒；金花清感颗粒	632-85-9	Ketone	COc1c(cc(c2c1oc(cc2=O)c1ccccc1)O)O	C16H12O5	284.26	Cell Cycle/Checkpoint	CDK	CDK	Wogonin is a cell-permeable and orally available flavonoid that displays anti-inflammatory and anticancer properties.	Chen LG, et al. Mol Nutr Food Res. 2008, 52(11):1349-57.
T3386	Kaempferitrin	Lespenephryl;Lespedin;Lespenefril;Kaempferol 3,7-dirhamnoside;Kaempferol	山奈苷	柴胡	小柴胡汤；清肺达原颗粒（肺炎1号）；清肺排毒汤；透解祛瘟颗粒	482-38-2	Flavonoid	C[C@H]1[C@@H]([C@H]([C@H]([C@@H](O1)Oc1cc(c2c(c1)oc(c(c2=O)O[C@H]1[C@@H]([C@@H]([C@H]([C@@H](O1)C)O)O)O)c1ccc(O)cc1)O)O)O)O	C27H30O14	578.5	Cell Cycle/Checkpoint; Metabolism	cell cycle arrest; Glucokinase	cell cycle arrest; PFK	Kaempferitrin has antidepressant-like effect related to the serotonergic system, principally 5-HT1A. Kaempferitrin exerts cytotoxic and antitumor effects against HeLa cells. Kaempferitrin stimulates glucose-metabolizing enzymes, promotes glucose homeostasis. Kaempferitrin exerts immunostimulatory effects on immune responses mediated by splenocytes, macrophages, PBMC and NK cells. Kaempferitrin in…	Da Silva D, et al. IUBMB Life. 2014 May;66(5):361-70.
T3805	Cimifugin beta-D-glucopyranoside	Prim-O-glucosylcimifugin;Cimifugin 7-glucoside	升麻苷	前胡	透解祛瘟颗粒	80681-45-4	Polyphenols	CC(C)([C@@H]1Cc2c(O1)cc1c(c2OC)c(=O)cc(o1)CO[C@H]1[C@@H]([C@H]([C@@H]([C@H](O1)CO)O)O)O)O	C22H28O11	468.45	Apoptosis	TNF inhibitor	TNF-α	Prim-O-glucosylcimifugin can inhibit the proliferation of SMC(smooth muscle cell) stimulated by TNF-alpha, increase the proportion of G0/G1 phase.	Zhao XL,et al. [Studies on effects of calycosin-7-O-β-D-glucoside on prim-O-glucosylcimifugin and cimifugin in vivo pharmacokinetics]. Zhongguo Zhong Yao Za Zhi.
T3867	Alpinetin	(-)-alpinetin	山姜素	生姜	小柴胡汤；清肺排毒汤	36052-37-6	Flavonoid	[C@H]1(CC(=O)c2c(O1)cc(cc2OC)O)c1ccccc1	C16H14O4	270.28	Apoptosis	BCL inhibitor	Bcl-2	Alpinetin has antibacterial activity.Alpinetin has anti-inflammatory activity.Alpinetin can enhance the sensitivity of HepG2 hepatoma cells to the chemotherapeutic agent CDDP. Alpinetin has strong anti-hepatoma and pancreatic cancer cells effects, by inhibiting proliferation , regulating of the Bcl-2 family and XIAP expression, releasing of cytochrome c and activating caspases.	Guan S,et al. Immunosuppressive activity of alpinetin on activation and cytokines secretion of murine T lymphocytes. Immunopharmacol Immunotoxicol. 2014 Aug;36(4):290-6.
T3019	Rheochrysidin	Parietin;Physcion;Physcione	大黄素甲醚	大黄	连花清瘟胶囊	521-61-9	Anthraquinones	COc1cc(O)c2C(=O)c3c(O)cc(C)cc3C(=O)c2c1	C16H12O5	284.27	Others;Metabolism	Others;Dehydrogenase	6-phosphogluconate dehydrogenase	Physcion (Parietin) is an anthraquinone isolated from traditional Chinese medicine Radix et Rhizoma Rhei, acts as an inhibitor of 6-phosphogluconate dehydrogenase, with an IC50 and a Kd of 38.5 μM and 26.0 μM, respectively. Physcion (Parietin) exhibits laxative, hepatoprotective, anti-inflammatory, anti-microbial, anti-proliferative and anti-tumor effects.	Ma X, et al. Pest Manag Sci, 2010, 66(7), 718-724.
T3878	Raddeanin A	Raddeanin R3;NSC382873;Anemodeanin A	竹节香附素A	人参	小柴胡汤	89412-79-3	Triterpenoids	C[C@@H]1O[C@@H](O[C@@H]2[C@@H](O)[C@H](O)[C@@H](CO)O[C@H]2O[C@@H]2[C@@H](O)[C@@H](O)CO[C@H]2O[C@H]2CC[C@@]3(C)[C@@H](CC[C@]4(C)[C@@H]3CC=C3[C@@H]5CC(C)(C)CC[C@@]5(CC[C@@]43C)C(O)=O)C2(C)C)[C@H](O)[C@H](O)[C@H]1O	C47H76O16	897.11	Chromatin/Epigenetic; DNA Damage/DNA Repair; NF-Κb	HDAC inhibitor	HDAC	Raddeanin A has moderate inhibitory activity against histone deacetylases (HDACs). Raddeanin A has high antiangiogenic potency, antitumor activity.	Guan YY,et al. Raddeanin A, a triterpenoid saponin isolated from Anemone raddeana, suppresses the angiogenesis and growth of human colorectal tumor by inhibiting VEGFR2 signaling. Phytomedicine. 2015 Jan 15;22(1):103-10.
T6463	Deoxyarbutin		脱氧熊果苷	牛蒡子	银翘散；金花清感颗粒	53936-56-4	Glycosides	c1(ccc(cc1)O)OC1CCCCO1	C11H14O3	194.23	Proteases/Proteasome	Tyrosinase inhibitor	Tyrosinase	DeoxyArbutin(IC50=50 nM) inhibits tyrosinase activity reversibly.	Boissy RE, et al. Exp Dermatol, 2005, 14(8), 601-608.
T4115	Auraptene	7-geranyloxycoumarin	橙皮油内酯	枳实	清肺排毒汤	495-02-3	Others	CC(=CCC/C(=C/COc1cc2c(cc1)ccc(=O)o2)/C)C	C19H22O3	298.4	Neuroscience	BACE inhibitor	BACE1	Auraptene is a coumarin derived from citrus plants that bears a geranyloxyl moiety at its C-7. It has anti-inflammatory, anti-carcinogenic, anti-bacterial, neuroprotective, and hepatoprotective activities. It inhibits leukocyte activation and induces phase II enzymes during the initiation phase of carcinogenesis.1 When examined for its potential use in Alzheimer’s disease treatment, auraptene was…	Murakami, A.,Nakamura, Y.,Tanaka, T., et al. Suppression by citrus auraptene of phorbol ester- and endotoxin-induced inflammatory responses: Role of attenuation of leukocyte activation. Carcinogenesis 21(10), 1843-1850 (2000).
T3318	Wogonoside	Oroxindin;Wogonin 7-O-glucuronide;Glychionide B	汉黄芩苷	黄芩	痰热清注射液；小柴胡汤；清肺达原颗粒（肺炎1号）；清肺排毒汤；透解祛瘟颗粒；金花清感颗粒	51059-44-0	Flavonoid	COc1c(cc(c2c1oc(cc2=O)c1ccccc1)O)O[C@H]1[C@@H]([C@H]([C@@H]([C@H](O1)C(=O)O)O)O)O	C22H20O11	460.39	Membrane transporter/Ion channel; Neuroscience	GABA Receptor inhibitor	GABA	Wogonoside acts as a positive allosteric modulator of the benzodiazepine site of the GABAA receptor.	Hui KM, et al. Biochem. Pharmacol. 2012, 64 (9): 1415–24.
T2842	Tangeretin	NSC53909;NSC618905;Tangeritin	桔皮素	枳实	清肺排毒汤	481-53-8	Flavonoid	COC1=CC=C(C=C1)C1=CC(=O)C2=C(O1)C(OC)=C(OC)C(OC)=C2OC	C20H20O7	372.38	Stem Cells	Gamma-secretase	Notch-1	Tangeretin, a flavonoid from citrus fruit peels, has been proven to play an important role in anti-inflammatory responses and neuroprotective effects in several disease models and was also selected as a Notch-1 inhibitor.	Hirano T, et al. Br J Cancer, 1995, 72(6), 1380-1388.
T2777	Ginsenoside Rg1	Panaxoside Rg1;Panaxoside A;Ginsenoside A2;Sanchinoside C1;Sanchinoside Rg1	人参皂苷Rg1	人参	小柴胡汤	22427-39-0	Glycosides	[C@@H]1([C@@H]([C@H]([C@@H]([C@H](O1)CO)O)O)O)O[C@@H]1[C@H]2C([C@H](CC[C@@]2([C@@H]2[C@@](C1)([C@@]1(CC[C@@H]([C@H]1[C@@H](C2)O)[C@](C)(CCC=C(C)C)O[C@H]1[C@@H]([C@H]([C@@H]([C@H](O1)CO)O)O)O)C)C)C)O)(C)C	C42H72O14	801.01	Neuroscience; NF-κB	Beta Amyloid; NF-κB	Amyloid-β; NF-κB	Ginsenosides are a class of steroid glycosides, and triterpene saponins found exclusively in the plant genus Panax (ginseng). It improves spatial learning and increase hippocampal synaptophysin level in mice, plus demonstrates estrogen-like activity.	Kwok HH, et al. Toxicol Appl Pharmacol. 2015 Sep 15;287(3):276-83.
T3792	Ajugol	Leonuride	益母草苷A	玄参	透解祛瘟颗粒	52949-83-4	Iridoids	C[C@@]1(C[C@H]([C@H]2[C@@H]1[C@@H](OC=C2)O[C@H]1[C@@H]([C@H]([C@@H]([C@H](O1)CO)O)O)O)O)O	C15H24O9	348.4	Others	Others	Others	Ajugol shows some trypanocidal potential against Trypanosoma brucei rhodesiense (IC50 values 29.3–73.0 ug/ml).	Elusiyan CA, et al. Distribution of iridiod glucosides and anti-oxidant compounds in Spathodea campanulata parts. Afr J Tradit Complement Altern Med. 2011;8(1):27-33.
T3809	Liriope muscari baily saponins C		短葶山麦冬皂苷C	麦冬	参麦注射液；生脉注射液	87480-46-4	Steroids	C[C@H]1[C@H]2[C@H](C[C@H]3[C@@H]4CC=C5C[C@H](CC[C@]5(C)[C@H]4CC[C@]23C)O[C@@H]2O[C@H](CO)[C@@H](O)[C@H](O[C@@H]3OC[C@@H](O)[C@H](O)[C@H]3O)[C@H]2O[C@@H]2O[C@@H](C)[C@H](O)[C@@H](O)[C@H]2O)O[C@]11CC[C@H](C)CO1	C44H70O17	871.03	Others	Others	Others	Liriope muscari baily saponins C has an anti-thrombotic activity due to down-regulation of the increased mRNA expression levels of TF and IL-6.	Yuan HK, et al. Preparation of liriope muscari baily saponins C solid lipid nanoparticles. Pharmaceutical Care and Research, 2007, 6.
T2727	Salvianolic acid B		丹参酚酸B	丹参	血必净注射液	115939-25-8	Phenols	OC(=O)[C@@H](Cc1ccc(O)c(O)c1)OC(=O)\C=C\c1ccc(O)c2O[C@@H]([C@@H](C(=O)O[C@H](Cc3ccc(O)c(O)c3)C(O)=O)c12)c1ccc(O)c(O)c1	C36H30O16	718.59	Others	Others	Others	Salvianolic acid B is an active pharmaceutical compound present in Salvia miltiorrhiza, exerts a neuroprotective effect in animal models of brain and spinal cord injury.	Xue L, et al. Asian Pac J Trop Med. 2014 Apr;7(4):280-4.
T1716	Echinacoside		松果菊苷	玄参	透解祛瘟颗粒	82854-37-3	Glycosides	c1(ccc(cc1O)/C=C/C(=O)O[C@H]1[C@@H]([C@H]([C@@H](O[C@@H]1CO[C@@H]1O[C@@H]([C@H]([C@@H]([C@H]1O)O)O)CO)OCCc1ccc(c(c1)O)O)O)O[C@@H]1O[C@H]([C@@H]([C@H]([C@H]1O)O)O)C)O	C35H46O20	786.73	Others	Others	Others	Echinacoside is a natural polyphenolic compound with various kinds of pharmacological activities, such as anti-inflammatory, antioxidative, hepatoprotective, neuroprotective, nitric oxide radical-scavenging and vasodilative ones.	Zhang D, et al. Int J Biol Macromol. 2014 Sep 2;72C:243-253.
T6S1487	Ginsenoside Rg5		人参皂苷Rg5	人参	小柴胡汤	186763-78-0	Triterpenoids	C\C(C)=C/CC=C(C)[C@H]1CC[C@]2(C)[C@@H]1[C@H](O)C[C@@H]1[C@@]3(C)CC[C@H](O[C@@H]4O[C@H](CO)[C@@H](O)[C@H](O)[C@H]4O[C@@H]4O[C@H](CO)[C@@H](O)[C@H](O)[C@H]4O)C(C)(C)[C@@H]3CC[C@@]21C	C42H70O12	767.01	Tyrosine Kinase/Adaptors	IGF-1R	IGF-1R	1. Ginsenoside Rg5 could be a beneficial agent for the treatment of Alzheimer's disease. 2. Ginsenoside Rg5 suppresses LPS-induced nitric oxide (NO) production and proinflammatory TNF-α secretion. 3. Ginsenoside Rg5 can ameliorate lung inflammation possibly by inhibiting the binding of LPS to toll-like receptor (TLR)-4 on macrophages. 4. Ginsenoside Rg5 plays a novel role as an IGF-1R agonist, pr…	Ginsenoside Rg5 improves cognitive dysfunction and beta-amyloid deposition in STZ-induced memory impaired rats via attenuating neuroinflammatory responses[J]. International Immunopharmacology, 2014, 19(2):317-326.
T6S1371	Isovitexin	Homovitexin;Saponaretin;Apigenin-6-C-Glucoside	异牡荆黄素	竹叶	银翘散	38953-85-4	Flavonoid	OC[C@H]1O[C@H]([C@H](O)[C@@H](O)[C@@H]1O)c1c(O)cc2oc(cc(=O)c2c1O)-c1ccc(O)cc1	C21H20O10	432.38	Metabolism	Glucokinase	α-glucosidase	1. Isovitexin exhibits a potential antioxidant activity. 2. Isovitexin shows a strong antihyperglycemic action, inhibits α-glucosidase in vivo.	Santos K C D , Borges T V , Olescowicz G , et al. Passiflora actinia hydroalcoholic extract and its major constituent, isovitexin, are neuroprotective against glutamate-induced cell damage in mice hippocampal slices[J]. Journal of Pharmacy & Pharmacology, 2016.
T2230	Paeoniflorin	Peoniflorin	芍药苷	赤芍	血必净注射液	23180-57-6	Glycosides	C[C@]12C[C@@]3([C@@H]4C[C@]1([C@@]4([C@H](O2)O3)COC(=O)c1ccccc1)O[C@H]1[C@@H]([C@H]([C@@H]([C@H](O1)CO)O)O)O)O	C23H28O11	480.46	Immunology/Inflammation; Neuroscience	COX inhibitor	COX	Paeoniflorin is a herbal constituent extracted from the root of Paeonia albiflora Pall.	Cao BY, et al. J Ethnopharmacol, 2010. 131(1): p. 122-9.
T2801	Aristolochic Acid	Aristolochic acid A;Aristolochic Acid I;Aristolochin;Aristolochine;TR 1736	马兜铃酸	细辛	清肺排毒汤	313-67-7	Others	COc1cccc2c3c4c(OCO4)cc(C(=O)O)c3c(cc12)[N+](=O)[O-]	C17H11NO7	341.27	Others	Others	Others	Aristolochic acids are a compound of mutagenic, carcinogenic, and nephrotoxic compounds commonly found in the Birthwort (Aristolochiaceae) family of plants.	Ma L, et al. J Ethnopharmacol. 2015 Aug 22;172:430-5.
T4S0171	Crocetin	trans-Crocetin;8,8'-Diapocarotenedioic Acid	藏红花酸	红花	血必净注射液	27876-94-4	Diterpenoids	CC(\C=C\C=C(/C)C(O)=O)=C/C=C/C=C(C)/C=C/C=C(\C)C(O)=O	C20H24O4	328.4	Others	Others	Others	1. Croceic acid is a singlet oxygen quencher.	Lautenschläger M, et al. Intestinal formation of trans-Crocetin from saffron extract (<i>Crocus sativus L.</i>) and in vitro permeation through intestinal and blood brain barrier. Phytomedicine. 2015 Jan 15;22(1):36-44.

## Sheet: M26714
ID	Name	Synonyms	Chinese Name	Source	方剂来源	CAS	Category	SMILES	Formula	MolWt	Pathways	Target	Receptor	Bioactivity	Reference
T3402	Ginsenoside Rg3	Rg3;S-Ginsenoside Rg3;20(S)-Ginsenoside-Rg3;20S-Ginsenoside Rg3	人参皂苷 Rg3	人参	小柴胡汤	14197-60-5	Triterpenoids	C\C(C)=C/CC[C@](C)(O)[C@H]1CC[C@]2(C)[C@@H]1[C@H](O)C[C@@H]1[C@@]3(C)CC[C@H](O[C@@H]4O[C@H](CO)[C@@H](O)[C@H](O)[C@H]4O[C@@H]4O[C@H](CO)[C@@H](O)[C@H](O)[C@H]4O)C(C)(C)[C@@H]3CC[C@@]21C	C42H72O13	785.02	Angiogenesis; JAK/STAT signaling; Tyrosine Kinase/Adaptors	EGFR inhibitor	EGFR	Ginsenoside Rg3 possess an ability to inhibit the lung metastasis of tumor cells via inhibition of the adhesion and invasion of tumor cells. It inhibits the proliferation of human umbilical vein endothelial cells(HUVEC) and has anti-angiogenesis activities.	Joo EJ, et al. Chem Biol Interact. 2015 May 25;233:25-34.
THS1455	DihydroarteMisinic acid	Dihydro-Artmisinic Acid	二氢青蒿酸	青蒿	热毒宁注射液；透解祛瘟颗粒；金花清感颗粒	85031-59-0	Coumarins	C[C@H]([C@@H]1CC[C@@H](C)[C@@H]2CCC(C)=C[C@H]12)C(O)=O	C15H24O2	236.35	Others	Others	Others	Dihydroartemisinic acid is a natural product from Artemisia annua and the main direct precursor of artemisinin, which is a medicinal herb that is widely used to treat Malaria.	Westfall P J , Pitera D J , Lenihan J R , et al. Production of amorphadiene in yeast, and its conversion to dihydroartemisinic acid, precursor to the antimalarial agent artemisinin[J]. Proceedings of the National Academy of Sciences of the United States of America, 2012, 109(3):655-656.
T3683	lithospermic acid		紫草酸	丹参	血必净注射液	28831-65-4	Others	O1[C@@H]([C@H](c2c(ccc(c12)O)/C=C/C(=O)O[C@H](Cc1cc(c(cc1)O)O)C(=O)O)C(=O)O)c1cc(c(cc1)O)O	C27H22O12	538.46	Microbiology&Virology; Proteases/Proteasome	HIV Protease inhibitor	HIV	lithospermic acid is a potent anti-HIV agent and shows anti-gonadotrophic and anti-thyroidal effects.	Xiuli W, Wei G, Mao S.Pharmacokinetic investigation on interaction between hydrophilic lithospermic acid B and lipophilic tanshinone IIA in rats: an experi- mental study.J Tradit Chin Med. 2015 Apr;35(2):206-10.
T3925	Astragaloside I	Cyclosieversioside B;Astrasieversianin IV	黄芪皂苷I	黄芪	透解祛瘟颗粒	84680-75-1	Triterpenoids	CC(=O)O[C@H]1[C@H](O)CO[C@@H](O[C@H]2CC[C@]34C[C@]33CC[C@]5(C)[C@H]([C@@H](O)C[C@@]5(C)[C@@H]3C[C@H](O[C@@H]3O[C@H](CO)[C@@H](O)[C@H](O)[C@H]3O)[C@H]4C2(C)C)[C@@]2(C)CC[C@H](O2)C(C)(C)O)[C@@H]1OC(C)=O	C43H68O16	840.99	Others	Others	Others	Astragaloside I is a natural product isolated from Astragalus.	JIN Yi-qun, et al. Determination of astragaloside-I content in Qidan Jiannao Granules with HPLC-ELSD. Acta Chinese Medicine and Pharmacology, 2006-02
T2741	Glycyrrhizin	Glycyrrhizic acid	甘草酸	甘草	连花清瘟胶囊；小柴胡汤	1405-86-3	Glycosides	C[C@]12CC[C@@](C)(C[C@H]1C1=CC(=O)[C@@H]3[C@@]4(C)CC[C@H](O[C@H]5O[C@@H]([C@@H](O)[C@H](O)[C@H]5O[C@@H]5O[C@@H]([C@@H](O)[C@H](O)[C@H]5O)C(O)=O)C(O)=O)C(C)(C)[C@@H]4CC[C@@]3(C)[C@]1(C)CC2)C(O)=O	C42H62O16	822.93	Metabolism	Dehydrogenase inhibitor;MAO	Dehydrogenase;MAO	Glycyrrhizic acid is a triterpenoid saponinl with anti-tumor and anti-diabetic activities.	Kiratipaiboon C, et al. Phytomedicine. 2015 Nov 14. pii: S0944-7113(15)00343-8.
T3852	Rhodiosin		红景天素	红景天	连花清瘟胶囊	86831-54-1	Ketone	Oc1ccc(cc1)C=5Oc4c(c(O)cc(O[C@@H]3O[C@@H](C)[C@H](O)[C@@H](O[C@@H]2O[C@H](CO)[C@@H](O)[C@H](O)[C@H]2O)[C@H]3O)c4O)C(=O)C=5O	C27H30O16	610.52	Others	Others	Others	Rhodiosin is a compound with antioxidant activity.
T2804	Panaxtriol	Panaxatriol	人参三醇	人参	小柴胡汤	32791-84-7	Terpenoids	C[C@@]1(CCCC(O1)(C)C)[C@H]2CC[C@@]3([C@@H]2[C@@H](C[C@H]4[C@]3(C[C@H]([C@@H]5[C@@]4(CC[C@@H](C5(C)C)O)C)O)C)O)C	C30H52O4	476.39	Others	Others	Others	Panaxatriol can relieve myelosuppression induced by radiation injury.	Cheng Y, Shen LH, Zhang JT. Acta Pharmacol Sin. 2005 Feb;26(2):143-9.
T6S1699	6-Shogaol	[6]-Shogaol;Shogaol	6-姜烯酚	生姜	小柴胡汤；清肺排毒汤	555-66-8	Phenols	CCCCC\C=C\C(=O)CCc1ccc(O)c(OC)c1	C17H24O3	276.37	Metabolism;Immunology/Inflammation	Lipoxygenase	LOX	1. 6-Shogaol has antipyretic and analgesic effects in addition to inhibitory effect on lipoxygenase activity. 2. 6-shogaol has anti-inflammatory property, reduces the inflammatory response and protected the femoral cartilage from damage produced in a CFA monoarthritic model of the knee joint of rats. 3. 6-Shogaol inhibits the growth of human cancer cells and induces apoptosis in COLO 25 cells thr…	Han M A , Woo S M , Min K J , et al. 6-Shogaol enhances renal carcinoma Caki cells to TRAIL-induced apoptosis through reactive oxygen species-mediated cytochrome c release and down-regulation of c-FLIP(L) expression[J]. Chem Biol Interact, 2015, 228:69-78.
T3884	Neoandrographolide	Neoandrographiside	新穿心莲内酯	穿心莲	喜炎平注射液	27215-14-1	Diterpenoids	O1CC=C(C1=O)CC[C@@H]1C(=C)CC[C@@H]2[C@@](CCC[C@@]12C)(CO[C@@H]1O[C@@H]([C@H]([C@@H]([C@H]1O)O)O)CO)C	C26H40O8	480.6	Immunology/Inflammation; Neuroscience	COX inhibitor; NOS inhibitor	COX-2; iNOS	Neoandrographolide has potent hypolipidemic effect and protects the cardiovascular without significant liver damage.Neoandrographolide has anti-inflammatory effect, might result from inhibition of iNOS and COX-2 expression through inhibiting p38 MAPKs activation.Neoandrographolide as chemosensitizer in S-Jurkat and X chromosome-linked inhibitor of apoptosis protein (XIAP)-overexpressing Jurkat ce…	Yang T,et al. Hypolipidemic effects of andrographolide and neoandrographolide in mice and rats. Phytother Res. 2013 Apr;27(4):618-23.
T6S2247	Alismoxide	(+)-Alismoxide	环氧泽泻烯	泽泻	清肺排毒汤	87701-68-6	Sesquiterpenoids	CC(C)C1=C[C@H]2[C@@H](CC[C@]2(C)O)[C@](C)(O)CC1	C15H26O2	238.37	Immunology/Inflammation	Others	Others	1. Alismoxide has anti-inflammatory effects.	Mona E , Namrita L , Ahmed H , et al. Cytotoxic, Cytostatic and HIV-1 PR Inhibitory Activities of the Soft Coral Litophyton arboreum[J]. Marine Drugs, 2013, 11(12):4917-4936.
T6S0721	Orientin	Lutexin;Luteolin-8-glucoside	荭草苷	竹叶	银翘散	28608-75-5	Flavonoid	OC[C@H]1OC([C@H](O)[C@@H](O)[C@@H]1O)c1c(O)cc(O)c2c1oc(cc2=O)-c1ccc(O)c(O)c1	C21H20O11	448.38	Others	Others	Others	1. Orientin may be regarded as a candidate therapeutic agent for treatment of vascular inflammatory diseases via inhibition of the HMGB1 signaling pathway. 2. Orientin protects vascular barrier integrity by inhibiting hyperpermeability, expression of CAMs, and adhesion and migration of leukocytes, thereby endorsing its usefulness as a therapy for vascular inflammatory diseases. 3. Orientin has ne…	LAW, B., LING, A., KOH, R., CHYE, S., & WONG, Y. (2013). Neuroprotective effects of orientin on hydrogen peroxide-induced apoptosis in SH-SY5Y cells. Molecular Medicine Reports, 9(3), 947-954. doi: 10.3892/mmr.2013.1878
T6S1315	Oroxylin A	6-Methoxybaicalein;Baicalein 6-methyl ether	千层纸素A	黄芩	痰热清注射液；小柴胡汤；清肺达原颗粒（肺炎1号）；清肺排毒汤；透解祛瘟颗粒；金花清感颗粒	480-11-5	Flavonoid	COC1=C(C=C2C(=C1O)C(=O)C=C(O2)C3=CC=CC=C3)O	C16H12O5	284.26	Autophagy; Metabolism	Autophagy; HIF/HIF Prolyl-Hydroxylase	Autophagy; HIF/HIF Prolyl-Hydroxylase	1. Oroxylin A has various anti-tumor effects including apoptosis, cell cycle arrest, drug-resistant reversion. 2. Oroxylin A possesses abilities of inhibiting the ATRA-induced IL-6 production via modulation of LAP/LIP/CHOP in leukemia cell lines, which could providing a therapeutic strategy for RAS. 3. Oroxylin A inhibits UCP2s triggers the MPTP opening, and promotes the apoptosis in CaCo-2 cells…	Ku S K , Lee I C , Bae J S . Antithrombotic activities of oroxylin A in vitro and in vivo[J]. Archives of Pharmacal Research, 2013, 37(5):679-86.
T6S1302	Carnosol		鼠尾草酚	丹参	血必净注射液	5957-80-2	Diterpenoids	CC(C)c1cc2[C@@H]3C[C@H]4C(C)(C)CCC[C@]4(C(=O)O3)c2c(O)c1O	C20H26O4	330.42	PI3K/Akt/mTOR signaling	S6 Kinase	RSK2	1. Carnosol has anti-oxidative, anti-inflammatory, antiproliferative and apoptosis inducing properties. 2. Carnosol enhances the sensitivity of chemoresistant cancer cells to chemotherapeutic agents. 3. Carnosol may as a novel agonist of TRPA1 with an EC5 value of 12.46 &micro;M.	López-Jiménez, Auxiliadora, García-Caballero, Melissa, Medina, Miguel ángel, et al. Anti-angiogenic properties of carnosol and carnosic acid, two major dietary compounds from rosemary[J]. European Journal of Nutrition, 2013, 52(1):85-95.
T3794	1,2,3,4,6-O-Pentagalloylglucose	Penta-O-galloyl-β-D-glucose;Pentagalloylglucose;1,2,3,4,6-O-Pentagalloylglucose;1,2,3,4,6-Penta-O-galloyl-beta-D-glucopyranose	1,2,3,4,6-五没食子酰葡萄糖	芍药	清肺达原颗粒（肺炎1号）	14937-32-7	Phenols	c1c(cc(c(c1O)O)O)C(=O)OC[C@@H]1[C@H]([C@@H]([C@H]([C@@H](O1)OC(=O)c1cc(c(c(c1)O)O)O)OC(=O)c1cc(c(c(c1)O)O)O)OC(=O)c1cc(c(c(c1)O)O)O)OC(=O)c1cc(c(c(c1)O)O)O	C41H32O26	940.68	Others	Others inhibitor	Others	1, 2, 3, 4, 6-Pentagalloylglucose and gallic acid from Pistacia lentiscus have antimutagenic and antioxidant activities. 2. 1, 2, 3, 4, 6-Penta-O-galloyl-beta-D-glucose (PGG) possesses potent anti-proliferative and anti-invasive effects, it also has inhibition of inducible nitric oxide synthase and cyclooxygenase-2 activity. 3. PGG may serve as a model for the development of new types of anti-dia…	Abdelwahed A, et al. Study of antimutagenic and antioxidant activities of gallic acid and 1,2,3,4,6-pentagalloylglucose from Pistacia lentiscus. Confirmation by microarray expression profiling. Chem Biol Interact. 2007 Jan 5;165(1):1-13.
T4S1796	Heterophyllin B		太子参环肽B	太子参	透解祛瘟颗粒	145459-19-4	Miscellaneous	CC[C@H](C)[C@@H]1NC(=O)[C@@H]2CCCN2C(=O)[C@@H]2CCCN2C(=O)[C@@H]2CCCN2C(=O)[C@H](CC(C)C)NC(=O)CNC(=O)CNC(=O)[C@H](Cc2ccccc2)NC1=O	C40H58N8O8	778.95	PI3K/AKT/β-catenin pathway	Others	Others	Heterophyllin B effectively suppresses the adhesion and invasion of the human esophageal carcinoma cells by mediating the PI3K/AKT/β-catenin pathways and regulating the expression levels of adhesion- and invasion-associated genes.	Tantai, Zhang, Zhao. Heterophyllin B inhibits the adhesion and invasion of ECA109 human esophageal carcinoma cells by targeting PI3K/AKT/βcatenin signaling[J]. Molecular Medicine Reports, 2015, 13(2).
T3488	Tectorigenin	Tectorigenine;4',5,7-Trihydroxy-6-methoxyisoflavone	鸢尾黄酮	射干	清肺排毒汤	548-77-6	Flavonoid	COc1c(O)cc2occ(-c3ccc(O)cc3)c(=O)c2c1O	C16H12O6	300.27	Apoptosis	Apoptosis inducer inhibitor	Apoptosis inducer	Tectorigenin is an O-methylated isoflavone. Tectorigenin Promotes Osteoblast Differentiation and in vivo Bone Healing, but Suppresses Osteoclast Differentiation and in vivo Bone Resorption.	Li QY, Chen L, Yan MM,et al.Tectorigenin regulates adipogenic differentiation and adipocytokines secretion via PPARγ and IKK/NF-κB signaling.Pharm Biol. 2015;53(11):1567-75.
T2S0257	Dehydroandrographolide succinate		脱水穿心莲内酯琥珀酸半酯	穿心莲	喜炎平注射液	786593-06-4	Others	C[C@@]1(COC(=O)CCC(O)=O)[C@@H](CC[C@]2(C)[C@@H]1CCC(=C)[C@H]2\C=C\C1=CCOC1=O)OC(=O)CCC(O)=O	C28H36O10	532.58	Others	Others	Others	Dehydroandrographolide Succinate is a traditional Chinese medicine used in the treatment of pneumonia, respiratory tract infection.
T6S1587	Notoginsenoside R2	Ginsenoside Ng-R2;20(S)-Notoginsenoside R2	三七皂苷R2	人参	小柴胡汤	80418-25-3	Others	C\C(C)=C\CC[C@](C)(O)[C@H]1CC[C@]2(C)[C@@H]1[C@H](O)C[C@@H]1[C@@]3(C)CC[C@H](O)C(C)(C)[C@@H]3[C@H](C[C@@]21C)O[C@@H]1O[C@H](CO)[C@@H](O)[C@H](O)[C@H]1O[C@@H]1OC[C@@H](O)[C@H](O)[C@H]1O	C41H70O13	770.99	Others	Others	Others	Notoginsenoside R2 has neuroprotection against 6-OHDA-induced neurotoxicity, is associated with Notoginsenoside R2-mediated P90RSK and Nrf2 activation through MEK1/2-ERK1/2 pathways.	Meng XB, et al. P90RSK and Nrf2 Activation via MEK1/2-ERK1/2 Pathways Mediated by Notoginsenoside R2 to Prevent 6-Hydroxydopamine-Induced Apoptotic Death in SH-SY5Y Cells. Evid Based Complement Alternat Med. 2013;22013:971712.
T5S1923	Schisandrin C	Wuweizisu-C;Schizandrin-C	五味子丙素	五味子	生脉注射液	61301-33-5	Others	COc1c2OCOc2cc2C[C@H](C)[C@H](C)Cc3cc4OCOc4c(OC)c3-c12	C22H24O6	384.42	Others	Others	Others	Schisandrin C is a phytochemical lignan isolated from Schizandra chinensis Baill; shows anticancer-effects in human leukemia U937 cells.	E Q, Tang M, et al.Protection of seven dibenzocyclooctadiene lignans from Schisandra chinensis against serum and glucose deprivation injury in SH-SY5Y cells.Cell Biol Int. 2015 Dec;39(12):1418-24
T2966	Beta-Sitosterol	22,23-Dihydrostigmasterol;β-Sitosterol;SKF 14463;Azuprostat;Betaprost;Cupreol	beta-谷甾醇	甘草	连花清瘟胶囊；小柴胡汤	83-46-5	Steroids	[C@@H]1(O)CC2=CC[C@@H]3[C@@H]([C@]2(CC1)C)CC[C@]1([C@H]3CC[C@@H]1[C@@H](CC[C@H](C(C)C)CC)C)C	C29H50O	414.72	Metabolism	Lipase inhibitor	PPL	β-Sitosterol has recently been shown to induce G2/M arrest, endoreduplication, and apoptosis through the Bcl-2 and PI3K/Akt signaling pathways. β-Sitosterol, a main dietary phytosterol found in plants, may have the potential for prevention and therapy for human cancer. Although the exact mechanism of action of β-sitosterols is unknown, it may be related to cholesterol metabolism or anti-inflammat…	Ong SL, et al. Porcine Pancreatic Lipase Inhibitory Agent Isolated from Medicinal Herb and Inhibition Kinetics of Extracts from Eleusine indica (L.) Gaertner. J Pharm (Cairo). 2016;2016:8764274.
T4S0792	(+)-pinoresinol-β-D-glucoside; (+)-pinor		松脂醇-4-O-BETA-D-吡喃葡萄糖苷	连翘	连花清瘟胶囊；痰热清注射液；银翘散；透解祛瘟颗粒	69251-96-3	Others	COc1cc(ccc1O)[C@H]1OC[C@H]2[C@@H]1CO[C@@H]2c1ccc(O[C@@H]2O[C@H](CO)[C@@H](O)[C@H](O)[C@H]2O)c(OC)c1	C26H32O11	520.53	Others	Others	Others		Parhira S,et al.In vitro anti-influenza virus activities of a new lignan glycoside from the latex of Calotropis gigantea.Send to
T4S0295	Apigenin 7-glucoside	Apigetrin;Cosmosiin;Apigenin-7-O-β-D-glucopyranoside;Cosmetin;Cosmosioside;Thalictiin	芹甙元-7-葡萄糖苷	广藿香	连花清瘟胶囊	578-74-5	Flavonoid	OC[C@H]1O[C@@H](Oc2cc(O)c3c(c2)oc(cc3=O)-c2ccc(O)cc2)[C@H](O)[C@@H](O)[C@@H]1O	C21H20O10	432.38	Microbiology&virology	HIV Protease	HIV	1. Cosmosiin is a anti-HIV agent. 2. Cosmosiin may be beneficial for diabetic complications through their enhanced adiponectin secretion, tyrosine phosphorylation of insulin receptor-β and GLUT4 translocation.	Rao Y K , Lee M J , Chen K , et al. Insulin-Mimetic Action of Rhoifolin and Cosmosiin Isolated from Citrus grandis (L.) Osbeck Leaves: Enhanced Adiponectin Secretion and Insulin Receptor Phosphorylation in 3T3-L1 Cells[J]. Evidence-based Complementary and Alternative Medicine, 2009, 2011(1741-427X):624375.
T5S0167	Atractylenolide I		白术内酯I；苍术内酯I	白术	清肺排毒汤	73069-13-3	Sesquiterpenoids	CC1=C2C[C@H]3C(=C)CCC[C@]3(C)C=C2OC1=O	C15H18O2	230.3	Apoptosis;Immunology/Inflammation	TNF;IL Receptor	TNF-α; IL-6	1. Atractylenolide-I has an anti-inflammatory effect by inhibiting TNF-α and IL-6 production; ameliorates sepsis syndrome, liver and kidney functions by reduction of pro-inflammatory cytokines and LPS. 2. Atractylenolide-I significantly sensitizes the response of MyD88(+) EOC cells to paclitaxel by blocking MD-2-mediated TLR4/MyD88 signaling.	Ji G , Chen R , Zheng J . Atractylenolide I inhibits lipopolysaccharide-induced inflammatory responses via mitogen-activated protein kinase pathways in RAW264.7 cells[J]. Immunopharmacology and Immunotoxicology, 2014, 36(6):420-425.
T3886	Rosavin	Rosavidin	络塞维	红景天	连花清瘟胶囊	84954-92-7	Phenylpropanoids	O1[C@H]([C@@H]([C@H]([C@@H]([C@H]1CO[C@@H]1OC[C@@H]([C@@H]([C@H]1O)O)O)O)O)O)OC/C=C/c1ccccc1	C20H28O10	428.43	Metabolism	P450 inhibitor	CYP3A4	Rosavin has antidepressant and anxiolytic actions, helps balance all the neurotransmitters.	Grech-Baran M1,et al. Biotransformation of cinnamyl alcohol to rosavins by non-transformed wild type and hairy root cultures of Rhodiola kirilowii. Biotechnol Lett. 2014 Mar;36(3):649-56.
T4S1452	Artemisinic acid	Artemisic acid;(+)-Artemisinic Acid	青蒿酸	青蒿	热毒宁注射液；透解祛瘟颗粒；金花清感颗粒	80286-58-4	Sesquiterpenoids	C[C@@H]1CC[C@H]([C@H]2C=C(C)CC[C@@H]12)C(=C)C(O)=O	C15H22O2	234.33	Microbiology&Virology	Antibacterial	Antibacterial	1. Artemisinic acid shows antibacterial activity. 2. Artemisinic acid is a major precursor of artemisinin (an antimalaric compound), isolated as the active principles of the medicinal plant Artemisia annua L.	Lee J , Kim M H , Lee J H , et al. Artemisinic acid is a regulator of adipocyte differentiation and C/EBP δ expression[J]. Journal of Cellular Biochemistry, 2012, 113(7):2488-2499.
T3672	Nomilin		诺米林	枳实	清肺排毒汤	1063-77-0	Triterpenoids	CC(=O)O[C@H]1CC(=O)OC(C)(C)[C@@H]2CC(=O)[C@]3(C)[C@H](CC[C@@]4(C)[C@@H](OC(=O)[C@H]5O[C@@]345)c3ccoc3)[C@@]12C	C28H34O9	514.57	MAPK	MAPK inhibitor	MAPK	Nomilin is naturally occurring triterpenoids, have immunomodulatory activity.	Battinelli L, et al. Effect of limonin and nomilin on HIV-1 replication on infected human mononuclear cells.[J]. Planta Medica, 2003, 69(10):910-913.
T3772	Maslinic acid	2α-Hydroxyoleanolic acid;Crategolic acid;2α-Hydroxyoleanoic Acid	山楂酸	藿香	清肺排毒汤	4373-41-5	Triterpenoids	C1C(CC[C@@]2(CC[C@]3([C@@]4(CC[C@H]5C([C@H]([C@@H](C[C@@]5([C@H]4CC=C3[C@H]12)C)O)O)(C)C)C)C)C(=O)O)(C)C	C30H48O4	472.71	DNA Damage/DNA Repair	DNA/RNA Synthesis inhibitor	DNA polymerase B	Maslinic acid is a DNA polymerase B inhibitor.	Umehara K,et al.Studies on differentiation-inducing activities of triterpenes.Chem Pharm Bull (Tokyo). 1992 Feb;40(2):401-5.
T5S0754	Isoquercitrin	Hirsutrin;3-Glucosylquercetin;Quercetin 3-o-glucopyranoside	异槲皮苷	桑叶	透解祛瘟颗粒	482-35-9	Flavonoid	OC[C@H]1O[C@@H](Oc2c(oc3cc(O)cc(O)c3c2=O)-c2ccc(O)c(O)c2)[C@H](O)[C@@H](O)[C@@H]1O	C21H20O12	464.37	Stem Cells	Wnt/beta-catenin	Wnt/β-catenin	1. Isoquercitrin is a potential stimulator of bone mineralization used for prophylaxis of osteoporotic disorders. 2. Isoquercitrin may be as a potential therapeutic agent against neurodegeneration in Parkinson's disease. 3. Isoquercitrin is an inhibitor of Wnt/β-catenin and may be as a potential novel anti-tumoral agent, such as against human pancreati、 liver cancer related to opioid receptors an…	Isoquercitrin and polyphosphate co-enhance mineralization of human osteoblast-like SaOS-2 cells via separate activation of two RUNX2 cofactors AFT6 and Ets1[J]. Biochemical Pharmacology, 2014, 89(3):413-421.
T6S0840	Engeletin	Dihydrokaempferol 3-rhamnoside	黄杞苷	茯苓	清肺排毒汤	572-31-6	Flavonoid	C[C@@H]1O[C@@H](O[C@@H]2[C@H](Oc3cc(O)cc(O)c3C2=O)c2ccc(O)cc2)[C@H](O)[C@H](O)[C@H]1O	C21H22O10	434.39	Endocrinology/Hormones	Reductase	Aldose reductase	1. Engeletin may serve as a potential anti-inflammatory agent. 2. Engeletin possesses potent inhibition of PGE2 release with IC5 values of 19.6 μg/ml. 3. Engeletin inhibits a recombinant human aldose reductase (IC5 value=1.16 microM).	Huang H , Cheng Z , Shi H , et al. Isolation and Characterization of Two Flavonoids, Engeletin and Astilbin, from the Leaves of Engelhardia roxburghiana and Their Potential Anti-inflammatory Properties[J]. Journal of Agricultural and Food Chemistry, 2011, 59(9):4562-4569.
T6S1525	Isochlorogenic acid B	3,4-Dicaffeoylquinic acid	异绿原酸B	金银花	连花清瘟胶囊；热毒宁注射液；痰热清注射液；透解祛瘟颗粒；透解祛瘟颗粒；金花清感颗粒	14534-61-3	Phenylpropanoids	O[C@@H]1C[C@](O)(C[C@@H](OC(=O)\C=C\c2ccc(O)c(O)c2)[C@@H]1OC(=O)\C=C\c1ccc(O)c(O)c1)C(O)=O	C25H24O12	516.45	oxidation-reduction	Antioxidant	Antioxidant	1. Isochlorogenic acid B has antioxidant activity.	Chen, Yu-Chian C . Virtual Screening and Drug Design for PDE-5 Receptor from Traditional Chinese Medicine Database[J]. Journal of Biomolecular Structure and Dynamics, 2010, 27(5):627-640.
T3S2197	Polygalic acid	Senegenic acid	远志皂甙	桔梗	生脉注射液	1260-04-4	Triterpenoids	CC1(C)CC[C@@]2(CCC3=C(CC[C@@H]4[C@@]5(C)C[C@H](O)[C@H](O)[C@](C)([C@@H]5CC[C@@]34C)C(O)=O)[C@@H]2C1)C(O)=O	C29H44O6	488.66	Others	Others	Others	Triterpenoid saponin. Shows expectorant, emetic and stimulant effects. Orally active.	Ling Y , Wu B , Wang K , et al. In vivo metabolism study of polygalic acid in rat using HPLC-ESI-MSn [J]. Biomedical Chromatography Bmc, 2012, 26(2).
T3893	Forsythoside B		连翘脂苷B	连翘	连花清瘟胶囊；痰热清注射液；银翘散；透解祛瘟颗粒	81525-13-5	Phenylpropanoids	O1[C@H]([C@@H]([C@H]([C@@H]([C@H]1CO[C@@H]1OC[C@]([C@H]1O)(O)CO)OC(=O)/C=C/c1cc(c(cc1)O)O)O[C@@H]1O[C@H]([C@@H]([C@H]([C@H]1O)O)O)C)O)OCCc1cc(c(cc1)O)O	C34H44O19	756.71	NF-Κb	NF-κB inhibitor	NF-κB	Forsythoside B binds to LPS and reduces the biological activity of serum LPS, and inhibits NF-κB activation. Forsythoside B inhibits the inflammatory response and has antioxidant properties. Potent neuroprotective effects with a favorable therapeutic time-window, reduce of cerebral ischemia and reperfusion injury degree, attenuating blood-brain barrier (BBB) breakdown; Rescued cardiac function fr…	Jiang WL, et al. Forsythoside B protects against experimental sepsis by modulating inflammatory factors. Phytother Res. 2012 Jul;26(7):981-7.
T6S2025	8-O-Acetylharpagide	Acetylharpagide;8-Acetylharpagide;3-Acetylharpagide	8-O-乙酰哈巴苷	玄参	透解祛瘟颗粒	6926-14-3	Iridoids	CC(=O)O[C@@]1(C)C[C@@H](O)[C@]2(O)C=CO[C@@H](O[C@@H]3O[C@H](CO)[C@@H](O)[C@H](O)[C@H]3O)[C@H]12	C17H26O11	406.38	Microbiology&Virology;Immunology/Inflammation	antibacterial	antibacterial	1. 8-O-Acetylharpagide has anti-inflammatory activity. 2. 8-O-Acetylharpagide has antibacteria and antiviral activities. 3. 8-O-Acetylharpagide has a biological activity on isolated smooth muscle preparations from guinea pig.	Bin-Yu W , Jian-Rong L I . Pharmacokinetics of 8-O-acetylharpagide and harpagide after oral administration of Ajuga decumbens extract in beagle dog[J]. China Journal of Chinese Materia Medica, 2013.
T3A2414	Manninotriose		甘露三糖	玄参	透解祛瘟颗粒	13382-86-0	Carbohydrates	OC[C@H]1O[C@H](OC[C@H]2O[C@H](OC[C@H]3OC(O)[C@H](O)[C@@H](O)[C@@H]3O)[C@H](O)[C@@H](O)[C@H]2O)[C@H](O)[C@@H](O)[C@H]1O	C18H32O16	504.43	Others	Others	Others	Manninotriose has the pharmacological activities, such as promoting the proliferation of hematopoietic cells, improving immunity, lowering blood glucose and anti-tumor.	dos Santos R, et al. Manninotriose is a major carbohydrate in red deadnettle (Lamium purpureum, Lamiaceae). Ann Bot. 2013 Mar;111(3):385-93.
T3811	Ginsenoside C-K	Ginsenoside compound K;Ginsenoside K	20(S)-人参皂苷 C-K	人参	小柴胡汤	39262-14-1	Triterpenoids	C\C(C)=C/CC[C@](C)(O[C@@H]1O[C@H](CO)[C@@H](O)[C@H](O)[C@H]1O)[C@H]1CC[C@]2(C)[C@@H]1[C@H](O)C[C@@H]1[C@@]3(C)CC[C@H](O)C(C)(C)[C@@H]3CC[C@@]21C	C36H62O8	622.88	Cell Cycle/Checkpoint;Metabolism	cell cycle arrest inhibitor;P450	cell cycle arrest;CYP2C9;CYP2A6	Ginsenoside C-K is a bacterial metabolite of G-Rb1 exhibiting anti-inflammatory effects by reducing iNOS and COX-2.	Yang XD,et al. A review of biotransformation and pharmacology of ginsenoside compound K. Fitoterapia. 2015 Jan;100:208-20.
T4S1024	Picfeltarraenin IB		苦玄参苷IB	玄参	透解祛瘟颗粒	97230-46-1	Triterpenoids	CC(C)C1=CC(=O)[C@](C)(O1)[C@H]1[C@H](O)C[C@@]2(C)[C@@H]3CC=C4[C@@H](CC[C@@H](O[C@@H]5O[C@H](CO)[C@@H](O)[C@H](O)[C@H]5O[C@@H]5O[C@@H](C)[C@H](O)[C@@H](O)[C@H]5O)C4(C)C)[C@]3(C)C(=O)C[C@]12C	C42H64O14	792.95	Others	Others	Others	1. Picfeltarraenin IB and Picfeltarraenin IA displayes no cytotoxic activity in vitro human tumor cell line panel.	Huang Y , De T B , Apers S , et al. Complement-inhibiting cucurbitacin glycosides from Picria fel-terrae.[J]. Journal of Natural Products, 1998, 61(6):757-761.
T6S2246	Alisol B 23-acetate	23-O-Acetylalisol B;Alisol B monoacetate;23-Acetylalismol B;Alisol B Acetate	泽泻醇B乙酸酯	泽泻	清肺排毒汤	26575-95-1	Triterpenoids	C[C@H](C[C@H](OC(C)=O)[C@H]1OC1(C)C)C1=C2C[C@H](O)[C@H]3[C@@]4(C)CCC(=O)C(C)(C)[C@@H]4CC[C@]3(C)[C@@]2(C)CC1	C32H50O5	514.74	Others	Others	Others	1. Alisol B 23-acetate produces protective effect against ANIT-induced hepatotoxity and cholestasis, due to FXR-mediated regulation of transporters and enzymes. 2. Alisol B 23-acetate produces promotive effect on liver regeneration, due to FXR-mediated regulation of genes involved in hepatocyte proliferation and hepato-protection. 3. Alisol B 23-acetate produces a protective effect against CCl4-i…	Wang C , Zhang J X , Shen X L , et al. Reversal of P-glycoprotein-mediated multidrug resistance by Alisol B 23-acetate[J]. Biochemical Pharmacology, 2004, 68(5):843-855.
T6S0270	Ononin	Formononetin 7-O-β-D-glucopyranoside;Ononoside;Formononetin glucoside;Formononetin 7-O-glucoside	芒柄花苷	甘草	连花清瘟胶囊；小柴胡汤	486-62-4	Flavonoid	COc1ccc(cc1)-c1coc2cc(O[C@@H]3O[C@H](CO)[C@@H](O)[C@H](O)[C@H]3O)ccc2c1=O	C22H22O9	430.4	Microbiology&Virology	antibacterial	antibacterial	1. Ononin can inhibit the growth of pathogen. 2. Ononin plays an important role in human nutrition as health promoting natural chemicals and are established to be the beneficial components.	Zhang W , Jiang S , Qian D W , et al. [The interaction between ononin and human intestinal bacteria].[J]. Acta Pharmaceutica Sinica, 2014, 49(8):1162-1168.
T3780	Oroxin B	Hypocretin-2	木蝴蝶苷B	黄芩	痰热清注射液；小柴胡汤；清肺达原颗粒（肺炎1号）；清肺排毒汤；透解祛瘟颗粒；金花清感颗粒	114482-86-9	Flavonoid	OC[C@H]1O[C@@H](OC[C@H]2O[C@@H](Oc3cc4oc(cc(=O)c4c(O)c3O)-c3ccccc3)[C@H](O)[C@@H](O)[C@@H]2O)[C@H](O)[C@@H](O)[C@@H]1O	C27H30O15	594.52	Others	Others	Others	Oroxin B has antioxidant activity.	Li DQ,et al. Discovery of xanthine oxidase inhibitors from a complex mixture using an online, restricted-access material coupled with column-switching liquid chromatography with a diode-array detection system. Anal Bioanal Chem. 2014 Mar;406(7):1975-84.
T4946	COLUMBIANETIN ACETATE		二氢欧山芹醇醋酸酯	当归	血必净注射液	23180-65-6	Coumarins	CC(=O)OC(C)(C)[C@@H]1Cc2c(O1)ccc1ccc(=O)oc21	C16H16O5	288.3	Others	Others	Others	Columbianetin may be helpful in regulating mast cell-mediated allergic inflammatory responses.The absorption of columbianetin acetate is a passive diffusion process without pH-dependent.	Chen Y F , Tsai H Y , Wu T S . Anti-inflammatory and analgesic activities from roots of Angelica pubescens.[J]. Planta Medica, 1995, 61(01):2-8.
T4963	Higenamine	Demethyl-Coclaurine	去甲乌药碱	细辛	清肺排毒汤	5843-65-2	Alkaloids	Oc1ccc(CC2NCCc3cc(O)c(O)cc23)cc1	C16H17NO3	271.31	GPCR/G Protein	Adrenergic Receptor	α1-adrenergic receptor	Higenamine is a novel α1 -adrenoceptor antagonist.	Zhang N, et al. Identification of higenamine as a novel α1 -adrenergic receptor antagonist. Phytother Res. 2019 Jan 15.
T4961	9'-Methyl lithospermate B		9’-丹酚酸B单甲酯	丹参	血必净注射液	1167424-31-8	Phenylpropanoids	COC(=O)[C@@H](Cc1ccc(O)c(O)c1)OC(=O)[C@H]1[C@@H](Oc2c1c(\C=C\C(=O)O[C@H](Cc1ccc(O)c(O)c1)C(O)=O)ccc2O)c1ccc(O)c(O)c1	C37H32O16	732.64	Others	Others	Others	NA
T3S0895	Spirostan-3-ol	Sarsaponin	剑麻皂苷元	知母	清肺达原颗粒（肺炎1号）	82597-74-8	Glycosides	C[C@H]1[C@H]2[C@H](C[C@H]3[C@@H]4CCC5CC(O)CC[C@]5(C)[C@H]4CC[C@]23C)O[C@]11CCC(C)CO1	C27H44O3	416.64	Others	Others	Others	Spirostan-3-ol is a stereoisomer of Sarsasapogenin (S142505), a steroid glycoside isolated from plant materials. A saponin with with potential anti-tumor activity via apoptosis.	Shen S. et al.: Biochem. Biophys. Res. Comm., 441, 519 (2013);
T5S2357	Acetylcorynoline	O-Acetylcorynoline;(+)-Corynoline Acetate	乙酰紫堇灵	前胡	透解祛瘟颗粒	18797-80-3	Alkaloids	CN1Cc2c3OCOc3ccc2[C@@]2(C)[C@H](Cc3cc4OCOc4cc3[C@@H]12)OC(C)=O	C23H23NO6	409.43	Microbiology&virology	Antifungal	Antifungal	1. Acetylcorynoline has antifungal、anti-inflammatory activity. 2. Acetylcorynoline may be one of the potent immunosuppressive agents through the blockage of dendritic cells maturation and function. 3. Acetylcorynoline is potential as a possible antiparkinsonian drug. (1) Significantly decreases dopaminergic neuron degeneration induced by 6-hydroxydopamine in BZ555 strain; (2) Prevents α-synuclein…	Wen C , Cai J , Lin C , et al. Gradient elution liquid chromatography mass spectrometry determination of acetylcorynoline in rat plasma and its application to a pharmacokinetic study[J]. Xenobiotica, 2014, 44(8):6.
T6S1652	Benzoylpaeoniflorin		苯甲酰芍药苷	芍药	清肺达原颗粒（肺炎1号）	38642-49-8	Monoterpenoids	C[C@@]12C[C@@]3(O)OC(O1)C1(COC(=O)c4ccccc4)[C@H]3C[C@@]21O[C@@H]1O[C@H](COC(=O)c2ccccc2)[C@@H](O)[C@H](O)[C@H]1O	C30H32O12	584.57	Immunology/Inflammation	COX inhibitor	COX-1;COX-2	1. Benzoylpaeoniflorin is active against cyclooxygenase-1 and cyclooxygenase-2 enzymes.	Er-Li Z , Yang L I , Hong-Yan G E . Effects of Benzoylpaeoniflorin on apoptosis of Rats with Coronary Heart Diseases[J]. Chinese Journal of Laboratory Diagnosis, 2011.
T6S1256	Ruscogenin		鲁斯可皂苷元	麦冬	参麦注射液；生脉注射液	472-11-7	Steroids	C[C@H]1[C@H]2[C@H](C[C@H]3[C@@H]4CC=C5C[C@@H](O)C[C@@H](O)[C@]5(C)[C@H]4CC[C@]23C)O[C@]11CC[C@@H](C)CO1	C27H42O4	430.62	Immunology/Inflammation	Others	Others	1. Ruscogenin has anti-inflammatory activity, suppressed zymosan A-evoked peritoneal total leukocyte migration in mice in a dose-dependent manner, 2. Ruscogenin inhibited adhesion of leukocytes to a human umbilical vein endothelial cell line (ECV34) injured by tumor necrosis factor-alpha (TNF-alpha) in a concentration-dependent manner. 3. Ruscogenin significantly attenuate LPS-induced acute lung …	Huang Y L , Kou J P , Ma L , et al. Possible Mechanism of the Anti-inflammatory Activity of Ruscogenin: Role of Intercellular Adhesion Molecule1 and Nuclear Factor-κB[J]. Journal of Pharmacological Sciences, 2008, 108(2):198-205.
T3804	Neomangiferin	Mangiferin 7-glucoside	新芒果苷	知母	清肺达原颗粒（肺炎1号）	64809-67-2	Xanthones	OC[C@H]1O[C@@H](Oc2cc3c(cc2O)oc2cc(O)c([C@@H]4O[C@H](CO)[C@@H](O)[C@H](O)[C@H]4O)c(O)c2c3=O)[C@H](O)[C@@H](O)[C@@H]1O	C25H28O16	584.48	Others	Others inhibitor	Others	Neomangiferin has beneficial effects on high fat diet-induced nonalcoholic fatty liver disease in rats. Neomangiferin and mangiferin inhibit tartrate-resistant acid phosphatase, a biochemical marker of osteoclast function and bone resorption.	Zhou C,et al. Beneficial effects of neomangiferin on high fat diet-induced nonalcoholic fatty liver disease in rats. Int Immunopharmacol. 2015 Mar;25(1):218-28.
T6S0109	Sipeimine	Imperialine;Kashmirine	西贝碱	川贝	透解祛瘟颗粒	61825-98-7	Alkaloids	C[C@H]1CC[C@@H]2N(C1)C[C@H]1[C@@H]3C[C@H]4[C@@H](CC(=O)[C@H]5C[C@@H](O)CC[C@]45C)[C@@H]3CC[C@H]1[C@]2(C)O	C27H43NO3	429.64	Others	Others	Others	1. Sipeimine has antiasthmatic effect, on tracheal M receptor antagonist. 2. Sipeimine can make Kaba cholinergic induced contraction of tracheal strips of the dose-response curve to the right.	Yin H , Chen J L . Sipeimine-Producing Endophytic Fungus Isolated from[J]. Zeitschrift für Naturforschung C, 2008, 63(11-12).
T4S2164	Narirutin	Naringenin-7-O-rutinoside;Isonaringin	柚皮芸香苷	枳实	清肺排毒汤	14259-46-2	Flavonoid	C[C@@H]1O[C@@H](OC[C@H]2O[C@@H](Oc3cc(O)c4C(=O)C[C@H](Oc4c3)c3ccc(O)cc3)[C@H](O)[C@@H](O)[C@@H]2O)[C@H](O)[C@H](O)[C@H]1O	C27H32O14	580.53	Others	Others	Others	1. Narirutin has antiproliferative property. 2. Narirutin has anti-oxidant property. 3. Narirutin has anti-allergic and anti-inflammatory properties , can reduce airway inflammation in ovalbumin (OVA)-sensitized / challenged NC / Nga mice , a model of allergic eosinophilic airway inflammation.	Ha S K , Park H Y , Eom H , et al. Narirutin fraction from citrus peels attenuates LPS-stimulated inflammatory response through inhibition of NF-κB and MAPKs activation.[J]. Food & Chemical Toxicology, 2012, 50(10):3498-3504.
T6S1665	Irisflorentin		次野鸢尾黄素	射干	清肺排毒汤	41743-73-1	Flavonoid	COc1cc(cc(OC)c1OC)-c1coc2cc3OCOc3c(OC)c2c1=O	C20H18O8	386.35	Apoptosis;Immunology/Inflammation	Others	Others	1. Irisflorentin blocks apoptosis pathways, by exerting its effects by promoting rpn-3 expression to enhance the activity of proteasomes and down-regulating egl-1 expression. 2. Irisflorentin has anti-inflammatory mechanism in LPS-activated RAW 264.7 macrophages, by reducing the transcriptional and translational levels of inducible nitric oxide synthase (iNOS) as well as the production of NO.	Chen Y M , Liu S P , Lin H L , et al. Irisflorentin improves α-synuclein accumulation and attenuates 6-OHDA-induced dopaminergic neuron degeneration, implication for Parkinson’s disease therapy[J]. BioMedicine, 2015, 5(1):4.
T6S0722	Isoorientin	Homoorientin;Luteolin-6-C-glucoside	异荭草苷;异荭草素	竹叶	银翘散	4261-42-1	Flavonoid	OC[C@H]1O[C@H]([C@H](O)[C@@H](O)[C@@H]1O)c1c(O)cc2oc(cc(=O)c2c1O)-c1ccc(O)c(O)c1	C21H20O11	448.38	oxidation-reduction;Immunology/Inflammation;Neuroscience	Antioxidant;COX	Antioxidant;COX-2	1. Luteolin-6-C-glucoside has antioxidant activity.	Cao J , Xia X , Dai X , et al. Flavonoids profiles, antioxidant, acetylcholinesterase inhibition activities of extract from Dryoathyrium boryanum (Willd.) Ching[J]. Food and Chemical Toxicology, 2013, 55(Complete):121-128.
T3773	Oxypaeoniflorin	Oxypaeoniflora	氧化芍药苷	赤芍	血必净注射液	39011-91-1	Monoterpenoids	C[C@@]12C[C@@]3(O)O[C@@H](O1)[C@]1(COC(=O)c4ccc(O)cc4)[C@H]3C[C@]21O[C@@H]1O[C@H](CO)[C@@H](O)[C@H](O)[C@H]1O	C23H28O12	496.46	Others	Others	Others	Oxypaeoniflorin is a natural product derived from Radix Paeoniae Rubra and Radix Paeoniae Alba.	M. Kaneda, Chemical studies on the oriental plant drugs—XXXIII : The absolute structures of paeoniflorin, albiflorin, oxypaeoniflorin and benzoylpaeoniflorin isolated from chinese paeony root. Tetrahedron Volume 28, Issue 16, 1972, Pages 4309-4317
T6S1027	Tussilagone		款冬酮	冬花	清肺排毒汤	104012-37-5	Sesquiterpenoids	CC\C(C)=C\C(=O)O[C@@H]1C[C@@H](C(C)C)[C@H]2[C@@H](CC(=O)[C@@H]2[C@@H](C)OC(C)=O)C1=C	C23H34O5	390.52	Immunology/Inflammation	Others	Others	1. Tussilagone inhibits dendritic cell function through the induction of heme oxygenase-1. 2. Tussilagone has anti-cancer activity, might be a potential chemotherapeutic agent for the prevention and treatment of human colon cancer. 3. Tussilagone has anti-oxidant and anti-inflammatory activities, may be an effective oxygenase-1 inducer and a valuable compound for modulating inflammatory condition…	Li H , Lee H J , Ahn Y H , et al. Tussilagone suppresses colon cancer cell proliferation by promoting the degradation of β-catenin[J]. Biochemical and Biophysical Research Communications, 2014, 443(1):132-137.
T8169	Decursinol		日本前胡醇	前胡	透解祛瘟颗粒	23458-02-8	Coumarins	CC1(C)Oc2cc(OC(C=C3)=O)c3cc2C[C@@H]1O	C14H14O4	246.26	Others	Others	Others	Decursinol is isolated from the roots of Angelica Gigas with an antinociceptive effect. It also has anti-tumor and anti-metastasis activity.	Choi SS, et al. Antinociceptive mechanisms of orally administered decursinol in the mouse. Life Sci. 2003 Jun 13;73(4):471-85.
T6S0444	Salvianolic acid A	Dan Phenolic Acid A	丹酚酸 A	丹参	血必净注射液	96574-01-5	Phenylpropanoids	OC(=O)[C@@H](Cc1ccc(O)c(O)c1)OC(=O)\C=C\c1ccc(O)c(O)c1\C=C\c1ccc(O)c(O)c1	C26H22O10	494.45	Proteases/Proteasome	MMP	MMP-9	Salvianolic acid A could protect the blood brain barrier through matrix metallopeptidase 9 (MMP-9) inhibition and anti-inflammation.	Zhang W, et al. Salvianolic acid A attenuates ischemia reperfusion induced rat brain damage by protecting the blood brain barrier through MMP-9 inhibition and anti-inflammation. Chin J Nat Med. 2018 Mar;16(3):184-193.
T3670	Forsythoside A	Forsythiaside	连翘脂苷A	连翘	连花清瘟胶囊；痰热清注射液；银翘散；透解祛瘟颗粒	79916-77-1	Phenylpropanoids	C[C@@H]1O[C@@H](OC[C@H]2O[C@@H](OCCc3ccc(O)c(O)c3)[C@H](O)[C@@H](O)[C@@H]2OC(=O)\C=C\c2ccc(O)c(O)c2)[C@H](O)[C@H](O)[C@H]1O	C29H36O15	624.59	Others	Others inhibitor	Others	Forsythoside A has antimicrobial, anticomplementary, anti-inflammatory and antiendotoxin activities. Forsythoside A inhibits Infected cells was confirmed by infecting primary chicken embryo kidney cells.	Li H, et al. Phytother Res. 2011 Mar;25(3):338-42.
T3866	Anwuligan	(+)-Anwulignan;Macelignan	安五脂素	五味子	生脉注射液	107534-93-0	Lignans	COc1cc(C[C@H](C)[C@H](C)Cc2ccc3OCOc3c2)ccc1O	C20H24O4	328.41	Others	Others	Others	Anwuligan is a lignan isolated from nutmeg with antimicrobial and anticariogenic activity against Streptococcus mutans and other streptococcus species.	Yang X,et al. [Selection of mobile phases for the determination of gamma-schisandrin and multi-active constituents in Schisandra chinensis and its preparations by high performance liquid chromatography].
T3908	10-Gingerol		[10]-姜酚	生姜	小柴胡汤；清肺排毒汤	23513-15-7	Phenols	CCCCCCCCC[C@H](O)CC(=O)CCc1ccc(O)c(OC)c1	C21H34O4	350.49	Apoptosis	Apoptosis inducer activator	Apoptosis inducer	10-Gingerol-induced apoptosis was accompanied by phosphorylation of the mitogen-activated protein kinase (MAPKs) family, p38 MAPK (p38), c-Jun N-terminal kinase (JNK), and extracellular signal-regulated kinase (ERK).	Ryu MJ1, Chung HS.[10]-Gingerol induces mitochondrial apoptosis through activation of MAPK pathway in HCT116 human colon cancer cells.In Vitro Cell Dev Biol Anim. 2015 Jan;51(1):92-101.
T3246	Tabersonine	Tabersonin;(-)-Tabersonine	它勃宁, 柳叶水甘草碱	甘草	连花清瘟胶囊；小柴胡汤	4429-63-4	Alkaloids	CC[C@@]12CC(C(=O)OC)=C3Nc4ccccc4[C@@]33CCN(CC=C1)[C@@H]23	C21H24N2O2	336.43	Others	Others	Others	Tabersonineis a terpene indole alkaloid found in the medicinal plant Catharanthus roseus.
TJS0387	Deoxyrhapontin	Desoxyrhaponticin;Deoxyrhaponticin	去氧土大黄苷	大黄	连花清瘟胶囊	30197-14-9	Phenols	COc1ccc(\C=C\c2cc(O)cc(O[C@@H]3O[C@H](CO)[C@@H](O)[C@H](O)[C@H]3O)c2)cc1	C21H24O8	404.41	Metabolism	Fatty Acid Synthase	FAS	1. Desoxyrhaponticin is an agent that is potentially effective in controlling postprandial hyperglycemia in diabetes, the in vivo antidiabetic action of this compound can be explained, in part at least, by inhibition of glucose transport in the small intestine and inhibition of glucose reabsorption in the kidney. 2. Desoxyrhaponticin and rhaponticin could be considered as promising fatty acid syn…	Li P , Tian W , Wang X , et al. Inhibitory effect of desoxyrhaponticin and rhaponticin, two natural stilbene glycosides from the Tibetan medicinal plant Rheum tanguticum Maxim. ex Balf, on fatty acid synthase and human breast cancer cells[J]. Food & Function, 2014, 5(2):251-256.
T5431	10-Shogaol		10-姜烯酚	生姜	小柴胡汤；清肺排毒汤	36752-54-2	Phenols	CCCCCCCCCC=CC(=O)CCc1ccc(O)c(OC)c1	C21H32O3	332.47	oxidation-reduction	Antioxidant	Antioxidant	10-Shogaol is an extract from ginger displaying antioxidant activity. It also may contain hypolipidemic and insulin-sensitizing effects.	Min BR, et al. Effects of Tissue Culture and Mycorrhiza Applications in Organic Farming on Concentrations of Phytochemicals and Antioxidant Capacities in Ginger (Zingiber officinale Roscoe) Rhizomes and Leaves. J Food Sci. 2017 Apr;82(4):873-881.
T0966	Sennoside A	NSC 112929	番泻苷A	大黄	连花清瘟胶囊	81-27-6	Glycosides	OC[C@H]1O[C@@H](Oc2cccc3[C@@H]([C@@H]4c5cccc(O[C@@H]6O[C@H](CO)[C@@H](O)[C@H](O)[C@H]6O)c5C(=O)c5c(O)cc(cc45)C(O)=O)c4cc(cc(O)c4C(=O)c23)C(O)=O)[C@H](O)[C@@H](O)[C@@H]1O	C42H38O20	862.74	Metabolism	MAO inhibitor	MAO	Sennoside A, a kind of irritant laxative isolated from rhei rhizome, causes purgative actions in the intestine.	Hiraoka A, et al. Chem Pharm Bull, 1989, 37(10), 2744-2746.
T5S0836	Astrasieversianin VII	Isoastragaloside II	黄芪甲苷VII	黄芪	透解祛瘟颗粒	86764-11-6	Triterpenoids	CC(=O)O[C@H]1[C@H](O)CO[C@@H](O[C@H]2CC[C@]34C[C@]33CC[C@]5(C)[C@H]([C@@H](O)C[C@@]5(C)[C@@H]3C[C@H](O[C@@H]3O[C@H](CO)[C@@H](O)[C@H](O)[C@H]3O)[C@H]4C2(C)C)[C@@]2(C)CC[C@H](O2)C(C)(C)O)[C@@H]1O	C43H70O15	827.01	Others	Others	Others	Isoastragaloside II is a derivative Astragaloside I, an ingredient in Astragalus membranaceus which is reported to have osteogenic properties.	Cheng, X., et al.: Phytother. Res., 30, 1680-1688 (2016)
T2872	Ginsenoside Re	Panaxoside Re;Sanchinoside Re;Ginsenoside B2;Chikusetsusaponin Ivc	人参皂苷Re	人参	小柴胡汤	52286-59-6	Glycosides	C[C@@H]1O[C@@H](O[C@@H]2[C@@H](O)[C@H](O)[C@@H](CO)O[C@H]2O[C@H]2C[C@]3(C)[C@H](C[C@@H](O)[C@@H]4[C@H](CC[C@@]34C)[C@](C)(CC\C=C(/C)C)O[C@@H]3O[C@H](CO)[C@@H](O)[C@H](O)[C@H]3O)[C@@]3(C)CC[C@H](O)C(C)(C)[C@H]23)[C@H](O)[C@H](O)[C@H]1O	C48H82O18	947.14	MAPK; Neuroscience; NF-κB	Amyloid-β; JNK; NF-κB	Amyloid-β; JNK; NF-κB	Ginsenoside Re may have properties that inhibit or prevent the growth of tumors.	Nam Y, et al. J Appl Toxicol. 2015 Aug;35(8):927-44.
T3403	Glabridin	Q-100692;KB-289522;LS-176045	光甘草定	甘草	连花清瘟胶囊；小柴胡汤	59870-68-7	Flavonoid	CC1(C)Oc2ccc3C[C@@H](COc3c2C=C1)c1ccc(O)cc1O	C20H20O4	324.37	Proteases/Proteasome;Membrane transporter/Ion channel;Neuroscience	Tyrosinase inhibitor;GABA Receptor	T1 tyrosinase; T3 tyrosinase;α1β2γ2 (GABAA receptor);α1β3γ2 (GABAA receptor);α1β2 (GABAA receptor);α1β1γ2 (GABAA receptor)	Glabridin may serve as an anti-inflammatory agent in diabetes-related vascular dysfunction, through regulating the synthesis and activity of iNOS under high-glucose levels; may possess a therapeutic effect on metabolic disorders( such as diabetes and hyperglycemia), by modulating glucose metabolism through AMPK in skeletal muscle cells. Glabridin may have potential as a chemopreventive agent agai…	Yokota Tm , et al. Pigment Cell Res. 1998 Dec;11(6):355-61.
T3801	Byakangelicin	Biacangelicin;Bjacangelicin;Bjakangelicin	白当归素	前胡	透解祛瘟颗粒	19573-01-4	Coumarins	COc1c2ccoc2c(OC[C@@H](O)C(C)(C)O)c2oc(=O)ccc12	C17H18O7	334.32	Others	Others inhibitor	Others	Byakangelicin is an antineoplastic agent.	Yang J, et al. Byakangelicin induces cytochrome P450 3A4 expression via transactivation of pregnane X receptors in human hepatocytes. Br J Pharmacol. 2011 Jan;162(2):441-51.
T3862	Irigenin		野鸢尾黄素	射干	清肺排毒汤	548-76-5	Flavonoid	COc1cc(cc(O)c1OC)-c1coc2cc(O)c(OC)c(O)c2c1=O	C18H16O8	360.32	NF-Κb	NF-κB inhibitor	NF-κB	Irigenin has antifungal activity.	Kwang Seok Ahn, et al. Inhibitory effects of Irigenin from the rhizomes of Belamcanda chinensis on nitric oxide and prostaglandin E2 production in murine macrophage RAW 264.7 cells. 2006, 78(20): 2336-2342.
T2S2173	Naringenin chalcone	Chalconaringenin;Isosalipurpol;trans-2'4'6'4-tetrahydroxychalcone	柚皮苷查尔酮	枳实	清肺排毒汤	73692-50-9	Chalcones	Oc1ccc(cc1)\C=C\C(=O)c1c(O)cc(O)cc1O	C15H12O5	272.25	Others	Others	Others	1. Naringenin chalcone has antiallergic activity 2. Naringenin chalcone suppresses asthmatic symptoms by inhibiting Th2 cytokine production from CD4 T cells. 3. Naringenin chalcone is a potent tomato flavonoid that improves adipocyte metabolic functions and exerts insulin-sensitizing effects by activating an adiponectin-related pathway. 4. Naringenin chalcone exhibits anti-inflammatory properties…	Horiba T , Nishimura I , Nakai Y , et al. Naringenin chalcone improves adipocyte functions by enhancing adiponectin production[J]. Molecular & Cellular Endocrinology, 2010, 323(2):208-214.
T3S0401	Piceatannol 3'-O-glucoside	Quzhaqigan;Piceatannol 3-glycoside	曲札茋苷、白皮杉醇-3'-O-葡萄糖苷	大黄	连花清瘟胶囊	94356-26-0	Phenols	OC[C@H]1O[C@@H](Oc2cc(\C=C\c3cc(O)cc(O)c3)ccc2O)[C@H](O)[C@@H](O)[C@@H]1O	C20H22O9	406.38	Others	Others;Arginase	Others;Arginase-2;Arginase-1	Piceatannol 3'-O-glucoside increases pulmonary blood oxygen tension and decreases pulmonary interstitial edema, so it can protect lung injury.	Woo A, et al. Arginase inhibition by piceatannol-3'-O-β-D-glucopyranoside improves endothelial dysfunctionvia activation of endothelial nitric oxide synthase in ApoE-null mice fed a high-cholesterol diet. Int J Mol Med. 2013 Apr;31(4):803-10.
T3902	Atractylenolide III	8β-Hydroxyasterolide;ICodonolactone	白术内酯 III	白术	清肺排毒汤	73030-71-4	Sesquiterpenoids	CC1=C2C[C@H]3C(=C)CCC[C@]3(C)C[C@]2(O)OC1=O	C15H20O3	248.32	Apoptosis	Apoptosis inducer inhibitor	Apoptosis inducer	Atractylenolide III may have therapeutic potential in treating homocysteine-mediated cognitive impairment and neuronal injury. Atractylenolide III is a potential candidate for the treatment of human lung carcinoma by inducing the release of cytochrome c, upregulating the expression of Bax and translocating apoptosis-inducing factor.	Zhao H,et al. Neuroprotection and mechanisms of atractylenolide III in preventing learning and memory impairment induced by chronic high-dose homocysteine administration in rats. Neuroscience. 2015 Apr 2;290:485-91.
T3S0081	Oxypeucedanin	Oxypeucadanin;(+-)-Oxypeucedanin	氧化前胡素	前胡	透解祛瘟颗粒	737-52-0	Coumarins	CC1(C)OC1COc1c2ccoc2cc2oc(=O)ccc12	C16H14O5	286.28	Others	Others	Others	1. Oxypeucedanin has novel anticancer effect, mediated via induction of G2-M cell cycle arrest and apoptosis in human prostate carcinoma DU145 cells. 2. Oxypeucedanin is a kind of open-channel blocker of the hKv1.5 channel and it prolongs the APD; therefore, it is an excellent candidate as an antiarrhythmic drug for atrial fibrillation.	Choi J S , Shin H Y , Kwon K S , et al. Effects of Oxypeucedanin on Global Gene Expression and MAPK Signaling Pathway in Mouse Neuroblastoma Neuro-2A Cells[J]. Planta Medica, 2011, 77(13):1512-1518.
T3865	beta-Eudesmol	Beta-Selinenol	beta-桉叶醇	苍术	透解祛瘟颗粒	473-15-4	Sesquiterpenoids	CC(C)(O)[C@@H]1CC[C@@]2(C)CCCC(=C)[C@@H]2C1	C15H26O	222.37	Neuroscience; Membrane transporter/Ion channel	AChR antagonist; TRP/TRPV Channel agonist	nAChR; TRPA1; TRPV3; TRPM8	β-Eudesmol is a noncompetitive antagonist of nicotinic acetylcholine receptors (nAChRs). It is a sesquiterpene that has been found in a variety of plants, including Cannabis, and has diverse biological activities.	Kimura M, et al. Mechanism of the blocking action of beta-eudesmol on the nicotinic acetylcholine receptor channel in mouse skeletal muscles[J]. Neuropharmacology, 1991, 30(8):835-41.
T5S1331	Herbacetin		草质素	红景天	连花清瘟胶囊	527-95-7	Flavonoid	C1=CC(=CC=C1C2=C(C(=O)C3=C(O2)C(=C(C=C3O)O)O)O)O	C15H10O7	302.23	PI3K/Akt/mTOR signaling	Others	Others	1. Herbacetin induces apoptosis in HepG2 cells, by ROS and PI3K/Akt pathway. 2. Herbacetin suppresses the HGF-induced motility of human breast cancer MDA-MB-231 cells by inhibiting c-Met and Akt phosphorylation.	Li L , Sapkota M , Kim S W , et al. Herbacetin inhibits inducible nitric oxide synthase via JNK and nuclear factor-κB in LPS-stimulated RAW264.7 cells[J]. European Journal of Pharmacology, 2015, 765:EJP42292.
T5S0331	Isoliquiritin	Neoisoliquritin	异甘草苷	甘草	连花清瘟胶囊；小柴胡汤	5041-81-6	Chalcones	OC[C@H]1O[C@@H](Oc2ccc(\C=C\C(=O)c3ccc(O)cc3O)cc2)[C@H](O)[C@@H](O)[C@@H]1O	C21H22O9	418.39	Apoptosis	p53	p53	1. Isoliquiritin has antitussive effects. 2. Isoliquiritin has antidepressant-like effects. 3. Isoliquiritin, liquiritin and isoliquirigenin inhibits the p53-dependent pathway and shows crosstalk between Akt activities.	Ho, Wing. Combination of liquiritin, isoliquiritin and isoliquirigenin induce apoptotic cell death through upregulating p53 and p21 in the A549 non-small cell lung cancer cells[J]. Oncology Reports, 2013.
T6S0077	Byakangelicol		白当归脑	当归	血必净注射液	26091-79-2	Coumarins	COc1c2ccoc2c(OC[C@H]2OC2(C)C)c2oc(=O)ccc12	C17H16O6	316.3	Neuroscience	COX	COX-2	1. Byakangelicol may inhibit P-gp expressed at the BBB even under in vivo conditions. 2. Byakangelicol can inhibit IL-1beta-induced PGE2 release in A549 cells; this inhibition may be mediated by suppression of COX-2 expression and the activity of COX-2 enzyme, thus it may have therapeutic potential as an anti-inflammatory drug on airway inflammation.	Lin C H , Chang C W , Wang C C , et al. Byakangelicol, isolated from Angelica dahurica, inhibits both the activity and induction of cyclooxygenase-2 in human pulmonary epithelial cells[J]. Journal of Pharmacy & Pharmacology, 2010, 54(9):1271-1278.
T2745	Glycyrrhetinic acid	Enoxolone	甘草次酸	甘草	连花清瘟胶囊；小柴胡汤	1449-05-4	Terpenoids	CC1([C@@H]2CC[C@@]3([C@@H]([C@]2(CC[C@@H]1O)C)C(=O)C=C1[C@]3(CC[C@@]2([C@@H]1C[C@@](CC2)(C)C(=O)O)C)C)C)C	C30H46O4	470.68	Others	Others	Others	Enoxolone (INN, BAN; also known as glycyrrhetinic acid) is a pentacyclic triterpenoid derivative of the beta-amyrin type obtained from the hydrolysis of glycyrrhizic acid, which was obtained from the herb licorice. It is used in flavoring and it masks the bitter taste of drugs like aloe and quinine. It is effective in the treatment of peptic ulcer and also has expectorant (antitussive) properties.	Parida PK, et al. Bioorg Med Chem Lett. 2014 Aug 15;24(16):3865-8.
T6S1918	Schisantherin B	Wuweizi ester-B;Gomisin-B;Schizantherin-B	五味子酯乙	五味子	生脉注射液	58546-55-7	Lignans	COc1cc2[C@H](OC(=O)C(\C)=C/C)[C@@](C)(O)[C@@H](C)Cc3cc4OCOc4c(OC)c3-c2c(OC)c1OC	C28H34O9	514.57	Others	Others	Others	1. Schisantherin B shows good effect in lowering the serum glutamic-pyruvic transaminase level of the patients suffering from chronic virus hepatitis.	Qin X L , Chen X , Zhong G P , et al. Effect of Tacrolimus on the pharmacokinetics of bioactive lignans of Wuzhi tablet (Schisandra sphenanthera extract) and the potential roles of CYP3A and P-gp[J]. Phytomedicine, 2014, 21(5):766-772.
T2925	Schizandrin B	gamma-Schisandrin;Wuweizisu-B;Schisandrin B;Schisandrin B (Sch B)	五味子素B	五味子	生脉注射液	61281-37-6	Phenylpropanoids	C[C@@H]1Cc2cc3c(c(c2c2c(c(c(cc2C[C@@H]1C)OC)OC)OC)OC)OCO3	C23H28O6	400.46	DNA Damage/DNA Repair; PI3K/Akt/mTOR signaling	ATM/ATR inhibitor	ATR	Schisandrin B has an antioxidant effect on rodent liver and heart.	Wu YF, et al. World J Gastroenterol, 2004, 10(20), 2944-2948.
T2734	Sennoside B		番泻苷B	大黄	连花清瘟胶囊	128-57-4	Others	OC[C@H]1O[C@@H](Oc2cccc3[C@H]([C@@H]4c5cccc(O[C@@H]6O[C@H](CO)[C@@H](O)[C@H](O)[C@H]6O)c5C(=O)c5c(O)cc(cc45)C(O)=O)c4cc(cc(O)c4C(=O)c23)C(O)=O)[C@H](O)[C@@H](O)[C@@H]1O	C42H38O20	862.74	Angiogenesis	PDGFR inhibitor	PDGFR	Sennoside B is an anthranoid. Anthranoid derivatives are used all over the world as a treatment for constipation.	Hiraoka A, et al. Chem Pharm Bull, 1989, 37(10), 2744-2746.
T5S1590	Notoginsenoside Fe	Ginsenoside Mb;Notoginseng triterpenes	三七皂苷Fe	人参	小柴胡汤	88105-29-7	Triterpenoids	C\C(C)=C/CC[C@](C)(O[C@@H]1O[C@H](CO[C@@H]2O[C@@H](CO)[C@H](O)[C@H]2O)[C@@H](O)[C@H](O)[C@H]1O)[C@H]1CC[C@]2(C)[C@@H]1[C@H](O)C[C@@H]1[C@@]3(C)CC[C@H](O[C@@H]4O[C@H](CO)[C@@H](O)[C@H](O)[C@H]4O)C(C)(C)[C@@H]3CC[C@@]21C	C47H80O17	917.14	Others	Others	Others	Notoginsenoside Fe is a natural compound isolated from Panax japlcus var.	Li S, et al. Development of a method to screen and isolate potential xanthine oxidase inhibitors from Panax japlcus var via ultrafiltration liquid chromatography combined with counter-current chromatography. Talanta. 2015 Mar;134:665-73.

## Sheet: M26715
ID	Name	Synonyms	Chinese Name	Source	方剂来源	CAS	Category	SMILES	Formula	MolWt	Pathways	Target	Receptor	Bioactivity	Reference
T4S1962	beta-Asarone	Cis-Isoasarone;Cis-Asarone;Cis-Isoelemicin	(Z)-1,2,4-三甲氧基-5-丙烯基苯;顺式细辛脑	细辛	清肺排毒汤	5273-86-9	Phenylpropanoids	COc1cc(OC)c(\C=C/C)cc1OC	C12H16O3	208.25	NF-Κb;MAPK;Autophagy	NF-κB;JNK	NF-κB;JNK	1. Beta-Asarone may be a potential preventive drug for Alzheimer's disease. 2. Beta-Asarone prevents autophagy and synaptic loss by reducing ROCK expression in SAMP8 mice. 3. The co-administration of beta-Asarone and l-dopa may contribute to the treatment of 6-OHDA-induced damage in rats by inhibiting autophagy activity. 4. Beta-Asarone exhibits anti-inflammatory effects by suppressing the produc…	Kumar R , Prakash O , Pan A K , et al. Compositional variations and anthelmentic activity of essential oils from rhizomes of different wild populations of Acorus calamus L. and its major component, beta-Asarone.[J]. Natural Product Communications, 2009, 4(2):275-278.
T3806	kaempferide	Kaempferol 4'-O-methyl ether;4'-Methylkaempferol;4'-O-Methylkaempferol;Kaempferol 4'-methyl ether	山奈素	红花	血必净注射液	491-54-3	Polyphenols	COc1ccc(cc1)c1c(c(=O)c2c(cc(cc2o1)O)O)O	C16H12O6	300.27	Endocrinology/Hormones	Estrogen/progestogen Receptor inhibitor	ER	Kaempferide triglycoside inhibits the proliferation of native and estrogen receptor beta overexpressing colon cancer cells through a mechanism not mediated by ligand binding dependent estrogen receptor activation.	Song P,et al. [Comparison of effects of kaempferide and anhydroicaritin on biomineralization of cultured osteoblasts]. Yao Xue Xue Bao. 2012 Jul;47(7):890-6.
T3665	Tectoridin	Shekanin	射干苷	射干	清肺排毒汤	611-40-5	Flavonoid	COc1c(cc2c(c1O)c(=O)c(co2)c1ccc(cc1)O)O[C@H]1[C@@H]([C@H]([C@@H]([C@H](O1)CO)O)O)O	C22H22O11	462.4	Endocrinology/Hormones; Enzyme	Reductase inhibitor	Aldose reductase	Tectoridin possesses an estrogenic and thyroid hormone-like agent by activating estrogen and thyroid hormone receptors. Tectoridin has anti-oxidant, anti-inflammatory and hypoglycemic activities; Tectoridin and its five metabolites inhibits the activities of lens aldose reductase in rat (IC₅₀: 1.4-15.5 μM).	Li Y, et al. Luminescence. 2016 Feb;31(1):38-46.
T5S0092	Epigoitrin	Goitrin;BA-51-090278;D-Goitrin;Goitrine	表告依春	板蓝根	连花清瘟胶囊	1072-93-1	Miscellaneous	C=C[C@@H]1CNC(=S)O1	C5H7NOS	129.17	Immunology/Inflammation	Antiviral	Antiviral	1. Epigoitrin has anti-virus activity. 2. Epigoitrin has anti-oxidant activity. 3. Epigoitrin has anti-inflammation activity.	In vitro antioxidant and anti-inflammatory activities of Radix Isatidis extract and bioaccessibility of six bioactive compounds after simulated gastro-intestinal digestion
T2794	Astilbin	Isoastilbin;Neoastilbin;Neoisoastilbin;Taxifolin 3-O-rhamnoside;Taxifolin 3-rhamnoside	落新妇苷	茯苓	清肺排毒汤	29838-67-3	Flavonoid	O1[C@@H](O[C@@H]2[C@H](Oc3c(C2=O)c(O)cc(O)c3)c2cc(O)c(O)cc2)[C@H](O)[C@H](O)[C@@H](O)[C@@H]1C	C21H22O11	450.39	Apoptosis; NF-κB	Keap1-Nrf2; NF-κB; TNF	Keap1-Nrf2; NF-κB; TNF-α	Astilbin is actions Flavonoid phytochemical found in St. John′s wort and Traditional Chinese Medicine herbal preparations.	Diao H, Kang Z, Han F, Jiang W. Food Chem Toxicol. 2014 Jan;63:104-10.
T5098	Isochlorogenic acid A	3,5-CQA;3,5-Dicaffeoylquinic acid	异绿原酸 A	金银花	连花清瘟胶囊；热毒宁注射液；痰热清注射液；透解祛瘟颗粒；透解祛瘟颗粒；金花清感颗粒	2450-53-5	Others	O[C@H]1[C@@H](C[C@@](O)(C[C@H]1OC(=O)\C=C\c1ccc(O)c(O)c1)C(O)=O)OC(=O)\C=C\c1ccc(O)c(O)c1	C25H24O12	516.45	Others	Others	Others	3,5-Dicaffeoylquinic acid is a natural phenolic acid with antioxidant and anti-inflammatory activities .	Malarz J, et al. Long-term cultured hairy roots of chicory-a rich source of hydroxycinnamates and 8-deoxylactucin glucoside. Appl Biochem Biotechnol. 2013 Dec;171(7):1589-601.
TWS1229	Aristolone	Aristofone	马兜铃酮	细辛	清肺排毒汤	25274-27-5	Ketone	C[C@@H]1CCCC2=CC(=O)[C@@H]3[C@@H](C3(C)C)[C@@]12C	C15H22O	218.34	Others	Others	Others	Aristolone has potential anti-cancer activity.	Priya Rani, M., & Padmakumari, K. (2012). HPTLC and reverse phase HPLC methods for the simultaneous quantification and in vitro screening of antioxidant potential of isolated sesquiterpenoids from the rhizomes of Cyperus rotundus. Journal Of Chromatography B, 904, 22-28. doi: 10.1016/j.jchromb.2012.05.042
T3S1088	Isoforsythiaside		异连翘酯苷	连翘	连花清瘟胶囊；痰热清注射液；银翘散；透解祛瘟颗粒	1357910-26-9	Phenylpropanoids	C[C@@H]1O[C@H](OC[C@H]2O[C@@H](OCCc3ccc(O)c(O)c3)[C@H](O)[C@@H](OC(=O)\C=C\c3ccc(O)c(O)c3)[C@@H]2O)[C@H](O)[C@H](O)[C@H]1O	C29H36O15	624.59	Microbiology&virology	Antifection	Antifection	Isoforsythiaside has antioxidant, and antibacterial activities.	Qu H, et al. Isoforsythiaside, an antioxidant and antibacterial phenylethanoid glycoside isolated from Forsythia suspensa. Bioorg Chem. 2012 Feb;40(1):87-91.
T5708	LUPENONE		羽扇烯酮	竹叶	银翘散	1617-70-5	Triterpenoids	[H][C@]12[C@@H](CC[C@]1(C)CC[C@]1(C)[C@]2([H])CC[C@]2([H])[C@@]3(C)CCC(=O)C(C)(C)[C@]3([H])CC[C@@]12C)C(C)=C	C30H48O	424.7	Others	phosphatase	PTP1B	Lupenone is a natural product isolated from Rhizoma Musae and has good anti-diabetic activity,and has anti-inflammatory activity.lupenone were potent PTP1B inhibitors with IC50 values of 15.11±1.23μM.	Xu F , Yang L , Huang X , et al. Lupenone is a good anti-inflammatory compound based on the network pharmacology[J]. Mol Divers.
T5736	CYNARIN	1,3-O-Dicaffeoylquinic acid;1,5-Dicaffeoylquinic acid	1,3-二咖啡酰奎宁酸	金银花	连花清瘟胶囊；热毒宁注射液；痰热清注射液；透解祛瘟颗粒；透解祛瘟颗粒；金花清感颗粒	19870-46-3	Phenylpropanoids	O[C@@H]1C[C@@](C[C@@H](OC(=O)\C=C\c2ccc(O)c(O)c2)[C@@H]1O)(OC(=O)\C=C\c1ccc(O)c(O)c1)C(O)=O	C25H24O12	516.45	Cytoskeletal Signaling;PI3K/Akt/mTOR signaling	Akt;PI3K	Akt;PI3K	CYNARIN is a natural product. It shows antioxidant and choleretic properties and is a potential immunosuppressive agent.	XIAOHai-bing, CAOXu, WANGLei, et al. 1,5-dicaffeoylquinicacidprotectsprimaryneuronsfromamyloidβ1-42-inducedapoptosisviaPI3K/Aktsignalingpathway[J]. 中华医学杂志(英文版), 2011, 124(17):2628-2635.
T5740	(25RS)-Ruscogenin		(25RS)鲁斯可皂苷元	麦冬	参麦注射液；生脉注射液	874485-32-2	Steroids	[H][C@]12C[C@@]3([H])[C@]4([H])CC=C5C[C@@H](O)C[C@@H](O)[C@]5(C)[C@@]4([H])CC[C@]3(C)[C@@]1([H])[C@H](C)[C@@]1(CCC(C)CO1)O2	C27H42O4	430.6	Others	Others	Others	(25RS)-Ruscogenin is a natual product.	NA
T3801	Byakangelicin	Biacangelicin;Bjacangelicin;Bjakangelicin	白当归素	前胡	透解祛瘟颗粒	19573-01-4	Coumarins	COc1c2ccoc2c(OC[C@@H](O)C(C)(C)O)c2oc(=O)ccc12	C17H18O7	334.32	Others	Others inhibitor	Others	Byakangelicin is an antineoplastic agent.	Yang J, et al. Byakangelicin induces cytochrome P450 3A4 expression via transactivation of pregnane X receptors in human hepatocytes. Br J Pharmacol. 2011 Jan;162(2):441-51.
T5716	4'-Methoxyresveratrol	4'-O-Methylresveratrol	白藜芦醇-4'-甲醚	大黄	连花清瘟胶囊	33626-08-3	Phenols	COc1ccc(cc1)\C=C\c1cc(O)cc(O)c1	C15H14O3	242.27	Others	advanced glycation end products	RAGE	4'-Methoxyresveratrol is a natural product form the roots of Rheum palmatum L,has significant hypoglycemic, anti-inflammatory, and antioxidant effects.4'-Methoxyresveratrol alleviates AGE-induced inflammation through suppressing RAGE-mediated MAPK/NF-κB signaling pathway and NLRP3 inflammasome activation.	Wenzhe Y , Mengru T , Yueliang Z , et al. 4′-Methoxyresveratrol Alleviated AGE-Induced Inflammation via RAGE-Mediated NF-κB and NLRP3 Inflammasome Pathway[J]. Molecules, 2018, 23(6):1447-.
T5723	DL-Menthol		薄荷脑	薄荷	银翘散	1490-04-6	Others	CC(C)C1CCC(C)CC1O	C10H20O	156.26	Others	Others	Others	DL-Menthol is an organic compound made synthetically or obtained from peppermint or mint oils with flavoring and local anesthetic properties.	Kozlovich S, Chen G, Watson CJ,et al.The role of L- and D-menthol in the glucuronidation and detoxification of the major lung carcinogen, NNAL[J].Drug Metab Dispos. 2019 Oct 2. pii: dmd.119.088351
T5711	Methylnissolin-3-O-glucoside	(6aR, 11 aR)-3-hydroxy-9,l0-diMethoxy pt	黄芪异黄烷苷,7,2'-二羟基-3',4'-二甲氧基异黄烷	黄芪	透解祛瘟颗粒	94367-42-7	Phenols	[H][C@@]12COc3cc(O[C@@H]4O[C@H](CO)[C@@H](O)[C@H](O)[C@H]4O)ccc3[C@]1([H])Oc1c2ccc(OC)c1OC	C23H26O10	462.45	Others	Others	Others	Methylnissolin-3-O-glucoside has anti-inflammatory effects,antioxidant activity.	Bratkov V , Shkondrov A , Zdraveva P , et al. Flavonoids from the Genus Astragalus: Phytochemistry and Biological Activity[J]. Pharmacognosy Reviews, 2016.
T5725	lithospermic acid B	Dan Shen Suan B;Salvianolic acid B	化合物lithospermic acid B	丹参	血必净注射液	121521-90-2	Others	OC(=O)[C@@H](Cc1ccc(O)c(O)c1)OC(=O)\C=C\c1ccc(O)c2O[C@H]([C@H](C(=O)O[C@H](Cc3ccc(O)c(O)c3)C(O)=O)c12)c1ccc(O)c(O)c1	C36H30O16	718.61	Chromatin/Epigenetic	Sirtuin	SIRT	lithospermic acid B is a water-soluble antioxidant from Salvia extract. It plays significant role of antioxidant effect; antiplatelet aggregation, anticoagulant, and antithrombotic effect	Wang J , Xiong X , Feng B . Cardiovascular Effects of Salvianolic Acid B[J]. Evidence-Based Complementary and Alternative Medicine, 2013, 2013:1-16.
T5713	2"-O-β-L-Galorientin		荭草素-2"-O-BETA-L-半乳糖苷	竹叶	银翘散	861691-37-4	Flavonoids	OC[C@H]1O[C@@H](O[C@@H]2[C@@H](O)[C@H](O)[C@@H](CO)O[C@H]2c2c(O)cc(O)c3c2oc(cc3=O)-c2ccc(O)c(O)c2)[C@H](O)[C@@H](O)[C@H]1O	C27H30O16	610.52	Others	Others	Others	2"-O-β-L-Galorientin is a natual product isaolated from Trollius chinensis Bunge.	Zou J H , Yang J S , Dong Y S , et al. Flavone C-glycosides from flowers of Trollius ledebouri[J]. Phytochemistry (Amsterdam), 2005, 66(10):1121-1125.
T5712	zerumbone		花薑酮	生姜	小柴胡汤；清肺排毒汤	471-05-6	Sesquiterpenoids	C\C1=C/CC(C)(C)\C=C\C(=O)\C(C)=C\CC1	C15H22O	218.33	Others	Others	Others	Zerumbone is a natural monocyclic sesquiterpene first isolated from rhizomes of the wild ginger Z. zerumbet.It has also been shown to have anti-oxidant and anti-inflammatory activities, contributing to immunomodulatory and hepatoprotective effects.	Ho Y C , Lee S S , Yang M L , et al. Zerumbone reduced the inflammatory response of acute lung injury in endotoxin-treated mice via Akt-NFκB pathway[J]. Chemico-biological interactions, 2017, 271:9.
T6S1294	Nicotiflorin	Kaempferol-3-O-Rutinoside;Nictoflorin;Nicotifloroside	山奈酚-3-O-芸香糖苷	红花	血必净注射液	17650-84-9	Flavonoid	C[C@@H]1O[C@@H](OC[C@H]2O[C@@H](Oc3c(oc4cc(O)cc(O)c4c3=O)-c3ccc(O)cc3)[C@H](O)[C@@H](O)[C@@H]2O)[C@H](O)[C@H](O)[C@H]1O	C27H30O15	594.52	Others	Others	Others	1. Nicotiflorin has potential therapeutic effects on cerebral ischemic illness. 2. Nicotiflorin has protective effects on reducing memory dysfunction, energy metabolism failure and oxidative stress in multi-infarct dementia model rats.	Kroner A , Marnet N , Andrivon D , et al. Nicotiflorin, rutin and chlorogenic acid: phenylpropanoids involved differently in quantitative resistance of potato tubers to biotrophic and necrotrophic pathogens[J]. Plant Physiology and Biochemistry, 2012, 57(none).
T3S1089	Phillygenin	(+)-Phillygenin;Epipinoresinol methyl ether;Phillygenol;Sylvatesmin;Forsythigenol	连翘脂素	连翘	连花清瘟胶囊；痰热清注射液；银翘散；透解祛瘟颗粒	487-39-8	Lignans	COc1cc(ccc1O)[C@H]1OC[C@H]2[C@@H]1CO[C@H]2c1ccc(OC)c(OC)c1	C21H24O6	372.41	Others	Others	Others	1. Phillyrin, (+)-Phillygenin, and (-)-phillygenin exert the strongest inhibitory activities on NO production with IC(5) values.	Song W , Ao M Z , Shi Y , et al. Interaction between phillygenin and human serum albumin based on spectroscopic and molecular docking[J]. Spectrochimica Acta Part A Molecular & Biomolecular Spectroscopy, 2012, 85(1):120-126.
T3872	Nodakenin	(+)-Marmesinin	紫花前胡苷	当归	血必净注射液	495-31-8	Coumarins	c1(=O)ccc2cc3c(cc2o1)O[C@H](C3)C(C)(C)O[C@@H]1O[C@@H]([C@H]([C@@H]([C@H]1O)O)O)CO	C20H24O9	408.4	Neuroscience	AChR inhibitor	AChE	Nodakenin is a compound with anti-allergic and anti-inflammatory activities.	Park SJ,et al. Effect of nodakenin on atopic dermatitis-like skin lesions. Biosci Biotechnol Biochem. 2014;78(9):1568-71.
T3373	Columbianadin	Zosimin;2-Butenoic acid	二氢欧山芹醇当归酸酯	当归	血必净注射液	5058-13-9	Diterpenoids	C/C=C(\C)/C(=O)OC([C@@H]1Cc2c3oc(=O)ccc3ccc2O1)(C)C	C19H20O5	328.36	Apoptosis	Apoptosis	Apoptosis	Columbianadin, one of the main bioactive constituents of the roots of Angelica pubescens Maxim. f. biserrata Shan et Yuan, has been found to possess obvious pharmacological effects in previous studies.	Zhang YB, et al. Biomedical Chromatography, 2016, 30(2):256-262;
T3912	Saikosaponin B1		柴胡皂苷B1	柴胡	小柴胡汤；清肺达原颗粒（肺炎1号）；清肺排毒汤；透解祛瘟颗粒	58558-08-0	Triterpenoids	C[C@H]1O[C@@H](O[C@H]2CC[C@@]3(C)[C@@H](CC[C@]4(C)[C@@H]3C=CC3=C5CC(C)(C)CC[C@]5(CO)[C@@H](O)C[C@@]43C)[C@]2(C)CO)[C@H](O)[C@@H](O[C@@H]2O[C@H](CO)[C@@H](O)[C@H](O)[C@H]2O)[C@H]1O	C42H68O13	780.98	Others	Others	Others	Saponin activator. Activates release of Prostaglandin E2 in vitro. Anti-inflammatory agent. Orally active. Active in vivo and in vitro.	Kyo R., et al. Antagonism of saikosaponin-induced prostaglandin E2 release by baicalein in C6 rat glioma cells. Biol Pharm Bull 22:1385-7 (1999).
T6S1768	Narcissoside	Narcissin;Isorhamnetin 3-Rutinoside	水仙苷	甘草	连花清瘟胶囊；小柴胡汤	604-80-8	Flavonoid	COc1cc(ccc1O)-c1oc2cc(O)cc(O)c2c(=O)c1O[C@@H]1O[C@H](CO[C@@H]2O[C@@H](C)[C@H](O)[C@@H](O)[C@H]2O)[C@@H](O)[C@H](O)[C@H]1O	C28H32O16	624.54	oxidation-reduction	Antioxidant	Antioxidant	1. Narcissoside, with synergism of B.flavum flavonoid and rutin, could be responsible for stronger protection against mitochondrial induced oxidative stress.	Gevrenova R , Kondeva-Burdina M , Denkov N , et al. Flavonoid profiles of three Bupleurum species and in vitrohepatoprotective activity of Bupleurum flavum Forsk.[J]. Pharmacognosy Magazine, 2015, 11(41):14.
T5S1028	3,29-Dibenzoyl Rarounitriol		3,29-二苯甲酰基栝楼仁三醇	瓜蒌	清肺达原颗粒（肺炎1号）	873001-54-8	Triterpenoids	[H][C@@]12C[C@H](O)C3=C(CC[C@@]4(C)[C@]5([H])C[C@](C)(COC(=O)c6ccccc6)CC[C@]5(C)CC[C@]34C)[C@@]1(C)CC[C@@H](OC(=O)c1ccccc1)C2(C)C	C44H58O5	666.94	Others	Others	Others	3,29-Dibenzoyl karounitriol is a natural product from Trichosanthes kirilowii Maxim.	Yan Z , Hai-Yan Y , Yu-Ting S , et al. Quality control of GualouXiebai drop pills[J]. Chinese Journal of Hospital Pharmacy, 2014.
T3848	7,2'-dihydroxy-3',4'-dimethoxyisoflavane-7-O-glucoside		黄芪异黄烷苷	黄芪	透解祛瘟颗粒	94367-43-8	Flavonoids	COc1ccc(C2COc3cc(O[C@@H]4O[C@H](CO)[C@@H](O)[C@H](O)[C@H]4O)ccc3C2)c(O)c1OC	C23H28O10	464.5	Others	Others	Others	7,2'-dihydroxy-3',4'-dimethoxyisoflavane-7-O-glucoside is a natural product from Astragalus membranaceus	NA
T6S2243	Alisol A 24-acetate	Alisol A 24-monoacetate;Alisol A monoacetate	泽泻醇A24-醋酸酯	泽泻	清肺排毒汤	18674-16-3	Triterpenoids	C[C@H](C[C@H](O)[C@@H](OC(C)=O)C(C)(C)O)C1=C2C[C@H](O)[C@H]3[C@@]4(C)CCC(=O)C(C)(C)[C@@H]4CC[C@]3(C)[C@@]2(C)CC1	C32H52O6	532.76	Others	Others	Others	1. Alisol A 24-acetate has been determined for the quality control of this crude drug.	Yu Y , Li Q , Bi K , et al. A sensitive liquid chromatography-mass spectrometry method for simultaneous determination of alisol A and alisol A 24-acetate from Alisma orientale (Sam.) Juz. in rat plasma[J]. Analytical and Bioanalytical Chemistry, 2011, 399(3):1363-1369.
T3S1251	Neoruscogenin		新鲁斯可皂苷元	麦冬	参麦注射液；生脉注射液	17676-33-4	Glycosides	C[C@H]1[C@H]2[C@H](C[C@H]3[C@@H]4CC=C5C[C@@H](O)C[C@@H](O)[C@]5(C)[C@H]4CC[C@]23C)O[C@]11CCC(=C)CO1	C27H40O4	428.61	Others	Others	Others	1. Neoruscogenin represents a universal pharmacological tool for RORα research due to its specific selectivity profile versus other nuclear receptors.	Barbic M , Willer E A , RothenhoFer M , et al. Spirostanol saponins and esculin from Rusci rhizoma reduce the thrombin-induced hyperpermeability of endothelial cells[J]. Phytochemistry, 2013, 90:106-113.
T4S0290	Chikusetsusaponin IV	Araloside A	楤木皂苷A，竹节参皂苷IV	人参	小柴胡汤	7518-22-1	Triterpenoids	CC1(C)CC[C@@]2(CC[C@]3(C)C(=CC[C@@H]4[C@@]5(C)CC[C@H](O[C@@H]6O[C@@H]([C@@H](O[C@@H]7O[C@@H](CO)[C@H](O)[C@H]7O)[C@H](O)[C@H]6O)C(O)=O)C(C)(C)[C@@H]5CC[C@@]34C)[C@@H]2C1)C(=O)O[C@@H]1O[C@H](CO)[C@@H](O)[C@H](O)[C@H]1O	C47H74O18	927.09	Apoptosis	Fas/FasL	Fas/FasL	1. Chikusetsusaponin IV might relieve cutaneous symptoms caused by excessive apoptotic cell death in the skin through the Fas/FasL pathway.	Hosononishiyama K , Matsumoto T , Kiyohara H , et al. Suppression of Fas-Mediated Apoptosis of Keratinocyte Cells by Chikusetsusaponins Isolated from the Roots of Panax japonicus[J]. Planta Medica, 2005, 72(03):193-198.
T4S1499	Ginsenoside Rk1		人参皂苷RK1	人参	小柴胡汤	494753-69-4	Triterpenoids	[H][C@@]12[C@H](CC[C@@]1(C)[C@]1(C)CC[C@@]3([H])C(C)(C)[C@H](CC[C@]3(C)[C@@]1([H])C[C@H]2O)O[C@@H]1O[C@H](CO)[C@@H](O)[C@H](O)[C@H]1O[C@@H]1O[C@H](CO)[C@@H](O)[C@H](O)[C@H]1O)C(=C)CC\C=C(/C)C	C42H70O12	767.01	Others	Others	Others	Ginsenoside Rk1 is a component created by processing the ginseng plant at high temperatures. Ginsenoside Rk1 has an anti-inflammatory effect, suppresses the activation of Jak2/Stat3 signaling pathway and NF-κB. It also has an anti-tumor effect.	Kim JS, et al. Induction of apoptosis by ginsenoside Rk1 in SK-MEL-2-human melanoma. Arch Pharm Res. 2012 Mar;35(4):717-22.
T3S1447	Arteannuin B		青蒿素B	青蒿	热毒宁注射液；透解祛瘟颗粒；金花清感颗粒	50906-56-4	Sesquiterpenoids	C[C@@H]1CC[C@H]2C(=C)C(=O)O[C@@]22[C@@H]3O[C@]3(C)CC[C@@H]12	C15H20O3	248.32	Others	Others	Others	1. Arteannuin B has potent antimalarial activity.	Deng D A , Xu C H , Cai J C . Derivatives of arteannuin B with antileukemia activity[J]. Acta Pharmaceutica Sinica, 1992, 27(4):317.
T2S1396	3-​O-​Acetyloleanolic acid		齐墩果酸 3-乙酸酯	栀子	热毒宁注射液；醒脑静注射液	4339-72-4	Triterpenoids	[H][C@@]12CC(C)(C)CC[C@@]1(CC[C@]1(C)C2=CC[C@]2([H])[C@@]3(C)CC[C@H](OC(C)=O)C(C)(C)[C@]3([H])CC[C@@]12C)C(O)=O	C32H50O4	498.74	Apoptosis	Apoptosis	Apoptosis	3-O-acetyloleanolic acid dose-dependently inhibited the viability of HCT-116 cells. Apoptosis was characterized by detection of cell surface annexin V and sub-G1 apoptotic cell populations.	Yoo K H , Park J H , Cui E J , et al. 3-O-Acetyloleanolic Acid Induces Apoptosis in Human Colon Carcinoma Hct-116 Cells[J]. Phytotherapy Research, 2012, 26(10):1541-1546.
T3768	Epifriedelanol	Epifriedelinol	表木栓醇	广藿香	连花清瘟胶囊	16844-71-6	Triterpenoids	C[C@H]1[C@@H](O)CC[C@H]2[C@]1(C)CC[C@@]1(C)[C@@]2(C)CC[C@@]2(C)[C@@H]3CC(C)(C)CC[C@]3(C)CC[C@]12C	C30H52O	428.7	Others	Others	Others	Epifriedelanol suppresses adriamycin-induced cellular senescence, replicative senescence in human fibroblasts (HDFs) and HUVECs. Because of Epifriedelanol can reduce cellular senescence in human primary cells, it may be used to develop dietary supplements or cosmetics that modulate tissue aging or aging-associated diseases.	Yang HH., et al. Epifriedelanol from the root bark of Ulmus davidiana inhibits cellular senescence in human primary cells.Planta Med. 2011 Mar;77(5):441-9.
T5653	Cinnamyl acetate	3-Phenylallyl acetate	乙酸桂酯	桂枝	清肺排毒汤	103-54-8	others	CC(=O)OC\C=C\c1ccccc1	C11H12O2	176.21	Others	Others			https://www.ncbi.nlm.nih.gov/pubmed/21929331
T5645	Nerol	Cis-Geraniol;Neryl alcohol	橙花醇	枳实	清肺排毒汤	106-25-2	others	C\C(C)=C\CC\C(C)=C/CO	C10H18O	154.25	Others	Others	Others	Nerol is a monoterpene found in many essential oils, such as lemon balm and hop.Nerol can lessened the severity of ouabain-triggered arrhythmias in mammalian heart.	De Menezes-Filho JER, de Souza DS, Santos-Miranda A,et al. Nerol Attenuates Ouabain-Induced Arrhythmias[J].Evid Based Complement Alternat Med. 2019 Mar 7;2019:5935921
T3765	L-asarinin	(-)-Episesamin	細辛素	细辛	清肺排毒汤	133-05-1	Lignans	C5O[C@@H](c1ccc2OCOc2c1)[C@H]6CO[C@H](c3ccc4OCOc4c3)[C@@H]56	C20H18O6	354.36	Others	Others	Others	Asarinin reduces peripheral blood concentration of IL-12 and inhibits the expression of CXCR3 and TLR4, which means Asarinin may have a role on the TLR4 pathway and produce prolongation of allograft heart survival.	Gu J., et al. The effect of Asarinin on Toll-like pathway in rats after cardiac allograft implantation. Transplant Proc. 2015 Mar;47(2):545-8.
T3S1513	(20R)-Protopanaxdiol	Protopanaxadiol;20R-Protopanaxadiol	(20R)-原人参二醇	人参	小柴胡汤	7755-01-3	Triterpenoids	C\C(C)=C/CC[C@@](C)(O)[C@H]1CC[C@]2(C)[C@@H]1[C@H](O)C[C@@H]1[C@@]3(C)CC[C@H](O)C(C)(C)[C@@H]3CC[C@@]21C	C30H52O3	460.74	Others	Others	Others	1. Protopanaxdiol has the effect of anti-tumor through increasing the activity of body immunity, inhibiting tumor interstitial microvascular density and its proliferation activity, improving the lymphocyte transformation, the activity of NK cells and the contents of IL-2 significantly. 2. Protopanaxdiol prevents and heals obesity, fatty liver and hypertriglyceridemia in mice fed with a high-fat d…	Liu R , Zhang J Z , Liu W C , et al. Anti-obesity effects of protopanaxdiol types of ginsenosides isolated from the leaves of american ginseng (panax quinquefolius l.) in mice fed with a high-fat diet[J]. Fitoterapia, 2010, 81(8):1079-1087.
T5803	D(-)-Tartaric acid		酒石酸	五味子	生脉注射液	526-83-0	Others	OC(C(O)C(O)=O)C(O)=O	C4H6O6	150.09	Others	Others	Others	D(-)-Tartaric acid found in many plants, particularly tamarinds and grapes,it is used to generate carbon dioxide through interaction with sodium bicarbonate following oral administration. Carbon dioxide extends the stomach and provides a negative contrast medium during double contrast radiography.	Danilewicz, John C . Role of Tartaric and Malic Acids in Wine Oxidation[J]. Journal of Agricultural and Food Chemistry, 2014, 62(22):5149-5155.
T5781	taraxasteryl acetate		蒲公英甾醇醋酸酯	竹叶	银翘散	6426-43-3	Triterpenoids	[H][C@]12CC[C@]3([H])[C@@]4(C)CC[C@H](OC(C)=O)C(C)(C)[C@]4([H])CC[C@@]3(C)[C@]1(C)CC[C@@]1(C)CCC(=C)[C@@H](C)[C@]21[H]	C32H52O2	468.8	Others	Others	Others	Taraxasterol acetate has anti-inflammatory activity in bino rats against carrageenan, formaldehyde and adjuvant induced inflammations. Taraxasterol acetate also displays potential antibacterial activities.	Srivastava P , Mohanti S , Bawankule D U , et al. Effect of Pluchea lanceolata bioactives in LPS-induced neuroinflammation in C6 rat glial cells[J]. Archiv für Experimentelle Pathologie und Pharmakologie, 2013, 387(2):119-127.
T5802	Stearyl glycyrrhetinate		硬脂醇甘草亭酸酯	甘草	连花清瘟胶囊；小柴胡汤	13832-70-7	Others	[H][C@@]12C[C@](C)(CC[C@]1(C)CC[C@]1(C)C2=CC(=O)[C@]2([H])[C@@]3(C)CC[C@H](O)C(C)(C)[C@]3([H])CC[C@@]12C)C(=O)OCCCCCCCCCCCCCCCCCC	C48H82O4	723.2	Others	Others	Others	Stearyl glycyrrhetinate, the stearyl ester of 18-β-glycyrrhetinic acid, has been demonstrated to improve antiviral effects, reduce inflammation and suppress allergies in the pharmaceutical and cosmetic industry.	Piquero-Casals J , Hexsel D , Mir-Bonafé JF, et al. Topical Non-Pharmacological Treatment for Facial Seborrheic Dermatitis[J]. Dermatol Ther (Heidelb).
T5779	MOSLOFLAVONE		5-羟基-6,7-二甲氧基黄酮	黄芩	痰热清注射液；小柴胡汤；清肺达原颗粒（肺炎1号）；清肺排毒汤；透解祛瘟颗粒；金花清感颗粒	740-33-0	Flavonoids	COc1cc2oc(cc(=O)c2c(O)c1OC)-c1ccccc1	C17H14O5	298.29	Apoptosis;Immunology/Inflammation	TNF;IL Receptor	TNF-α;IL-1β	MOSLOFLAVONE showed promising anti-inflammatory activity via inhibition of TNF-α and IL-1β with IC50 values of 0.71 μM and 7.8 μM, respectively.	Singh B , Sidiq T , Joshi P , et al. Anti-inflammatory and immunomodulatory flavones from Actinocarya tibetica Benth.[J]. Natural Product Research, 2013, 27(23):2227-2230.
T5799	Arecaidine hydrochloride		盐酸槟榔次碱	槟榔	清肺达原颗粒（肺炎1号）	6018-28-6	Alkaloids	Cl.CN1CCC=C(C1)C(O)=O	C7H12ClNO2	177.63	Others	Others	Others	Arecaidine hydrochloride may have carcinogenesis.	Nery, R. The metabolic interconversion of arecoline and arecoline 1-oxide in the rat[J]. Biochemical Journal, 1971, 122(4):503-508.
T5808	OXYPEUCEDANIN HYDRATE		水合氧化前胡素	当归	血必净注射液	133164-11-1	Others	CC(C)(O)C(O)COc1c2ccoc2cc2oc(=O)ccc12	C16H16O6	304.29	Others	Others	Others	Oxypeucedanin hydrate is a furanocoumarin. It has a role as a metabolite.	Mottaghipisheh J , Márta Nové, Spengler G , et al. Antiproliferative and cytotoxic activities of furocoumarins of Ducrosia anethifolia[J]. Pharmaceutical Biology, 2018, 56(1):658-664.
T5774	7-demethylsuberosin	Demethylsuberosin	7-去甲基软木花椒素	当归	血必净注射液	21422-04-8	Coumarins	C\C(C)=C\Cc1cc2ccc(=O)oc2cc1O	C14H14O3	230.26	GPCR/G Protein	Prostaglandin Receptor	PGE2	7-demethylsuberosin is a coumarin compound isolated from Angelica gigas Nakai,and has anti-inflammatory activity,and exhibited inhibitory effects on PGE2 production with the IC50 values of 9.42 μM.	Kim HJ, Kim HM, Ryu B,et al.Constituents of PG201 (Layla(®)), a multi-component phytopharmaceutical, with inhibitory activity on LPS-induced nitric oxide and prostaglandin E2 productions in macrophages[J].Arch Pharm Res. 2016 Feb;39(2):231-239.
T5746	Dictamnine	Dectamine	白鲜碱	竹叶	银翘散	484-29-7	Alkaloids	COc1c2ccoc2nc2ccccc12	C12H9NO2	199.21	Microbiology&virology	Antifection	Antifection	Dictamnine shows anticholinesterase, anti-inflammatory, mutagenic, and has antimicrobial activity against bacteria and fungi. It has the ability to exert cytotoxicity in human cervix, colon, and oral carcinoma cells.	Guo N , Yu L , Meng R , et al. Global gene expression profile of Saccharomyces cerevisiae induced by dictamnine[J]. Yeast, 2008, 25(9):631-641.
T5763	Sedanolide		新蛇床内酯	川芎	血必净注射液	6415-59-4	Others	CCCCC1OC(=O)C2=CCCCC12	C12H18O2	194.27	Others	Others	Others	Sedanolide is a natural phthalide first isolated from seed oil of the Umbelliferae family, including celery.	Hsieh S L , Chen C T , Wang J J , et al. Sedanolide induces autophagy through the PI3K, p53 and NF-κB signaling pathways in human liver cancer cells[J]. International Journal of Oncology, 2015, 47(6).
T5770	Alisol B		泽泻醇 B	泽泻	清肺排毒汤	18649-93-9	Triterpenoids	[H][C@@]1(OC1(C)C)[C@@H](O)C[C@@H](C)C1=C2C[C@H](O)[C@@]3([H])[C@@]4(C)CCC(=O)C(C)(C)[C@]4([H])CC[C@]3(C)[C@@]2(C)CC1	C30H48O4	472.7	Others	Others	RANKL	Alisol B may be a potential novel therapeutic molecule for bone disorders through targeting the differentiation of osteoclasts as well as their functions. Alisol B also inhibited RANKL-induced expression of NFATc1 and c-Fos, which are key transcription factors for osteoclastogenesis.	Lee J W , Kobayashi Y , Nakamichi Y , et al. Alisol-B, a novel phyto-steroid, suppresses the RANKL-induced osteoclast formation and prevents bone loss in mice[J]. Biochemical Pharmacology, 2010, 80(3):352-361.
T5759	marmesin	(+)-Marmesin;(S)-Marmesin	异紫花前胡内酯	前胡	透解祛瘟颗粒	13849-08-6	Others	CC(C)(O)[C@@H]1Cc2cc3ccc(=O)oc3cc2O1	C14H14O4	246.26	Metabolism;Immunology/Inflammation	Lipoxygenase;COX	5-Lipoxygenase;COX-2	Marmesin is a coumarin originally isolated from the mature bark of A. marmelos,exhibiting COX-2/5-LOX dual inhibitory activity.	Marmesin is a novel angiogenesis inhibitor: Regulatory effect and molecular mechanism on endothelial cell fate and angiogenesis[J]. Cancer Letters, 2015, 369(2):323-330.
T1693	7-Hydroxycoumarin	Hydrangin;Hydrangine;NSC 19790;Skimmetine;Umbelliferone	7-羟基香豆素	前胡	透解祛瘟颗粒	93-35-6	Ketone	Oc1cc2c(cc1)ccc(=O)o2	C9H6O3	162.14	oxidation-reduction	Antioxidant	Antioxidant	Umbelliferone is found in anise. Umbelliferone occurs widely in plants including Angelica species Phytoalexin of infected sweet potat. It has been reported to have antioxidant properties.	Kabeya LM, et al. Chem Biol Interact. 2013 Oct 25;206(1):63-75.
T2S2264	Linalool	Phantol;(±)-Linalool;Linalol	芳樟醇；沉香醇	细辛	清肺排毒汤	78-70-6	Monoterpenoids	C\C(C)=C/CCC(C)(O)C=C	C10H18O	154.25	Apoptosis; Immunology/Inflammation; NF-Κb	TNF inhibitor	TNF-α; IL-6	1. Linalool, a natural compound of the essential oils, has been shown to have antinociceptive, antimicrobial, and anti-inflammatory properties. 2. Linalool was protected against LPS/GalN-induced liver injury through induction of antioxidant defense via Nrf2 activating and reduction inflammatory response via NF-κB inhibition. 3. Linalool biosynthesis and accumulation might be involved in plant def…	Coelho VR, et al. Phytomedicine. 2011, 18(10):896-901.
T4S1990	Carvacrol	cymophenol;O-Thymol;Karvakrol	香荆芥酚	金银花	连花清瘟胶囊；热毒宁注射液；痰热清注射液；透解祛瘟颗粒；透解祛瘟颗粒；金花清感颗粒	499-75-2	Monoterpenoids	CC1=C(C=C(C=C1)C(C)C)O	C10H14O	150.22	Others	Others	Others	1. 5-Isopropyl-2-methylphenol presents anxiolytic effects. 2. 5-Isopropyl-2-methylphenol presents antinociceptive activity. 3. 5-Isopropyl-2-methylphenol presents antidepressant effects, seems to be dependent on its interaction with the dopaminergic system, but not with the serotonergic and noradrenergic systems.	Melo F H C , Rocha, Nayrton Flávio Moura, Citó, Maria do Carmo de Oliveira, et al. Antinociceptive activity of carvacrol (5-isopropyl-2-methylphenol) in mice.[J]. Journal of Pharmacy & Pharmacology, 2012, 64(12):1722-1729.
T3S2259	Methyl eugenol	4-allylveratrole;eugenyl methyl ether;O-methyleugenol;Eugenol Methyl ether	甲基丁香酚；丁香酚甲醚；丁子香酚甲醚	细辛	清肺排毒汤	93-15-2	Phenylpropanoids	COc1ccc(CC=C)cc1OC	C11H14O2	178.23	Neuroscience	GABA Receptor	GABAA	1. Methyleugenol (ME) is a natural constituent of the essential oils of a number of plants widely used in foodstuffs as flavouring agents, in view of the carcinogenic potential of ME, the need to check its presence in food products with effective analytical methods. 2. Methyleugenol has insecticidal properties. 3. Methyleugenol can inhibit the production of nitric oxide and decreased the protein …	Choi Y K , Cho G S , Hwang S , et al. Methyleugenol reduces cerebral ischemic injury by suppression of oxidative injury and inflammation[J]. Free Radical Research, 2010, 44(8):925-935.
T1301	Guaiacol	2-Methoxyphenol;o-methoxyphenol;2-hydroxyanisole;O-methylcatechol	愈创木酚	当归	血必净注射液	90-05-1	Phenols	COc1ccccc1O	C7H8O2	124.14	Immunology/Inflammation; NF-κB	COX; NF-κB	COX; NF-κB	Guaiacol is a precursor to various flavorants, such as eugenol and vanillin. Its derivatives are used medicinally as an expectorant, antiseptic, and local anesthetic. It also can be used as an indicator in chemical reactions that produce oxygen. When oxygen binds to it, the complex turns yellowish brown and absorbs light maximally at about 470 nm.	Dorfner R, et al. J Agric Food Chem. 2003 Sep 10;51(19):5768-73.
TCS0102	Pulegone	(+)-Pulegone	蒲勒酮，胡薄荷酮，长叶薄荷酮	薄荷	银翘散	89-82-7	Monoterpenoids	C[C@@H]1CC\C(=C(/C)C)C(=O)C1	C10H16O	152.23	Membrane transporter/Ion channel	calcium channel	L-type calcium channel	1. Pulegone has cytotoxicity followed by regenerative cell proliferation is the MOA for Pulegone-induced urothelial tumors in female rats. 2. Pulegone induces a verapamil-sensitive psychostimulant effect that appears to independ on the opening of L-type calcium channels. 3. Pulegone has negative reinforcing properties and seems to possess anxiolytic-like actions unrelated to the benzodiazepine si…	Silveira N S D , Oliveira-Silva G L D , Lamanes B D F , et al. The Aversive, Anxiolytic-Like, and Verapamil-Sensitive Psychostimulant Effects of Pulegone[J]. Biological and Pharmaceutical Bulletin, 2014, 37(5):771-778.
T3698	alpha-Asarone	trans-Asarone;α-Asarone	α-细辛脑	细辛	清肺排毒汤	2883-98-9	Phenylpropanoids	COc1cc(OC)c(\C=C\C)cc1OC	C12H16O3	208.3	Metabolism	HMG-CoA Reductase inhibitor; P450 inhibitor	HMGCR; CYP2D6; CYP3A4	Alpha-Asarone is a psychoactive compound with antidepressant-like activity in mice.	Limón, L, et al. Neuroscience Letters 453(2), 2009, 98-103.
T4S1551	Cinnamaldehyde	Cinnamic Aldehyde	肉桂醛	桂枝	清肺排毒汤	104-55-2	Phenylpropanoids	O=CC=Cc1ccccc1	C9H8O	132.16	Chromatin/Epigenetic	HIF	HIF-α	1. Cinnamaldehyde has antipyretic activity. 2. Cinnamaldehyde is a sedative agent. 3. Cinnamaldehyde inhibits invasive capabilities of MDA-MB-435S cells was correlated with down-regulating the expression of miR-27a. 4. Cinnamaldehyde induces the generation of reactive oxygen species and exerts vasodilator and anticancer effects. 5. Cinnamaldehyde appears to be a promising candidate as an adjuvant…	Raffai, Gábor, Kim B , Park S , et al. Cinnamaldehyde and cinnamaldehyde-containing micelles induce relaxation of isolated porcine coronary arteries: role of nitric oxide and calcium[J]. International Journal of Nanomedicine, 2014.
T0539	Hydrocaffeic acid	Dihydrocaffeic acid	二氢咖啡酸	丹参	血必净注射液	1078-61-1	Phenylpropanoids	OC(=O)CCc1cc(O)c(O)cc1	C9H10O4	182.18	oxidation-reduction	Antioxidant	Antioxidant	Dihydrocaffeic Acid is a natural product containing a catechol group with an α,β-unsaturated carboxylic acid chain. Dihydrocaffeic Acid has been shown to have hepatoprotective activity. Dihydrocaffeic Acid is a metabolite of Caffeic Acid with potent antioxidant properties.	Pérez-Alvarez V, et al. Structure-hepatoprotective activity relationship of 3,4-dihydroxycinnamic acid (caffeic acid) derivatives. J Appl Toxicol. 2001 Nov-Dec;21(6):527-31.
T2565	Hesperetin		橙皮素	枳实	清肺排毒汤	520-33-2	Flavonoid	c12c(c(cc(c1)O)O)C(=O)C[C@H](O2)c1ccc(c(c1)O)OC	C16H14O6	302.27	GPCR/G Protein; Stem Cells; Neuroscience	5-HT Receptor inhibitor; TGF-beta/Smad inhibitor	HT; TGFβ	Hesperetin belongs to the flavanone class of flavonoids. Hesperetin, in the form of its glycoside hesperidin, is the predominant flavonoid in lemons and oranges.	Arya A, et al. Bioflavonoid hesperetin overcome bicalutamide induced toxicity by co-delivery in novel SNEDDS formulations: Optimization, in vivo evaluation and uptake mechanism. Mater Sci Eng C Mater Biol Appl. 2017 Feb 1;71:954-964.
T3S1858	Lutein	Xanthophyll;Xantofyl;Bo-Xan;Vegetable Lutein	叶黄素	连翘	连花清瘟胶囊；痰热清注射液；银翘散；透解祛瘟颗粒	127-40-2	Tetraterpenoids	CC(\C=C\C=C(C)\C=C\[C@H]1C(C)=C[C@H](O)CC1(C)C)=C/C=C/C=C(C)/C=C/C=C(C)/C=C/C1=C(C)C[C@@H](O)CC1(C)C	C40H56O2	568.88	Microbiology&virology	Antibacterial	Antibacterial	1. Lutein has antitumour action. 2. Lutein has antimutagenic action. 3. Lutein has a wide range of antimicrobial action. 4. Lutein is potentially useful for treating macular degeneration.	Bunger M , Quataert M , Kamps L , et al. Bioavailability of lutein from a lutein-enriched egg-yolk beverage and its dried re-suspended versions[J]. International Journal of Food Sciences and Nutrition, 2014, 65(7):903-909.
T2858	Baicalein	5,6,7-Trihydroxyflavone	黄芩黄素	黄芩	痰热清注射液；小柴胡汤；清肺达原颗粒（肺炎1号）；清肺排毒汤；透解祛瘟颗粒；金花清感颗粒	491-67-8	Flavonoid	c1ccc(cc1)c1cc(=O)c2c(c(c(cc2o1)O)O)O	C15H10O5	270.24	Immunology/Inflammation	ROS inhibitor;ferroptosis inhibitor	XO	Baicalein is a xanthine oxidase inhibitor.	Shieh DE,et al. Antioxidant and free radical scavenging effects of baicalein, baicalin and wogonin. Anticancer Res. 2000 Sep-Oct;20(5A):2861-5.
T2869	Emodin	Frangula emodin	大黄素	大黄	连花清瘟胶囊	518-82-1	Anthraquinones	Cc1cc(c2c(c1)C(=O)c1cc(cc(c1C2=O)O)O)O	C15H10O5	270.24	Metabolism; Stem Cells	Casein Kinase inhibitor	CK2	Emodin is a naturally occurring anthraquinone present in the roots and barks of numerous plants; exerts antiproliferative effects in Y cells that are regulated by different signaling pathways.	Yim H, et al. Emodin, an anthraquinone derivative isolated from the rhizomes of Rheum palmatum, selectively inhibits the activity of casein kinase II as a competitive inhibitor. Planta Med. 1999 Feb;65(1):9-13.
T0775	Coumarin		香豆素	桂枝	清肺排毒汤	91-64-5	Phenylpropanoids	O=c1oc2ccccc2cc1	C9H6O2	146.14	Metabolism	Factor Xa inhibitor; Vitamin antagonist	Factor Xa; VK	Coumarin is a chemical compound/poison found in many plants, notably in high concentration in the tonka bean, woodruff, and bison grass. It has clinical value as the precursor for several anticoagulants, notably warfarin.	Egan D, et al. Drug Metab Rev, 1990, 22(5), 503-529.
T0562	Protocatechuic acid	3,4-Dihydroxybenzoic acid;Protocatechuate;3, 4-Dihydroxybenzoic acid	原儿茶酸	五味子	生脉注射液	99-50-3	Phenols	OC(=O)c1cc(O)c(O)cc1	C7H6O4	154.12	Others	Others	Others	Protocatechuic acid (3, 4-dihydroxybenzoic acid) is a natural phenolic compound found in many edible and medicinal plants. Recent studies indicate that it could be used as a protective agent against cardiovascular diseases and neoplasms. The mechanism of its action is mostly associated with antioxidant activity, including inhibition of generation as well as scavenging of free radicals and up-regu…	Thakare VN, et al. Attenuation of acute restraint stress-induced depressive like behavior and hippocampal alterations with protocatechuic acid treatment in mice. Metab Brain Dis. 2016 Oct 26.
T0853	Adenosine	D-Adenosine;Adenine riboside	腺苷	红花	血必净注射液	58-61-7	Alkaloids	OC[C@@H]1[C@@H](O)[C@@H](O)[C@@H](O1)n1cnc2c(N)ncnc12	C10H13N5O4	267.24	DNA Damage/DNA Repair	Nucleoside Antimetabolite/Analog antagonist	Nucleoside	Adenosine is a ribonucleoside comprised of adenine bound to ribose, with vasodilatory, antiarrhythmic and analgesic activities.	Zhou JZ, et al. Oncogene. 2015 Apr 2;34(14):1831-42.
T2912	Ergosterol	Provitamin D;Provitamin D2;Ergosterin	麦角固醇	猪苓	清、肺排毒汤	57-87-4	Steroids	CC(C)[C@@H](C)/C=C/[C@@H](C)[C@H]1CC[C@@H]2[C@@]1(CC[C@H]1C2=CC=C2[C@@]1(CC[C@@H](C2)O)C)C	C28H44O	396.66	Others	Others	Others	Ergosterol is a steroid extracted from Ganoderma lucidum cystocarp.	Haubrich BA, et al. J Lipid Res. 2015 Feb;56(2):331-41.
T2867	Diosgenin	Nitogenin	薯蓣皂苷配基	山药	清肺排毒汤	512-04-9	Glycosides	C[C@H]1[C@H]2[C@H](C[C@H]3[C@@H]4CC=C5C[C@@H](O)CC[C@]5(C)[C@H]4CC[C@]23C)O[C@]11CC[C@@H](C)CO1	C27H42O3	414.63	JAK/STAT Signaling; Stem Cells	STAT	STAT3	Diosgenin is a spirostan found in DIOSCOREA and other plants. It has favorable effects in the improvement of diabetes and regulation of lipid metabolism.	Wu L, et al. Biol Reprod. 2015 Jan;92(1):24.
T6717	Vanillin	p-Hydroxy-m-methoxybenzaldehyde;p-Vanillin;m-Methoxy-p-hydroxybenzaldehyde;FEMA 3107;Lioxin;Zimco	香草醛	川芎	血必净注射液	121-33-5	Phenols	COc1c(O)ccc(C=O)c1	C8H8O3	152.15	Others	Others	Others	Vanillin is a single molecule extracted from vanilla beans and also a popular odor used widely in perfume, food and medicine.Vanillin can reversibly and non-competitively inhibit the cellulase activity at appropriate concentrations and the value of IC50 was estimated to be 30 g/L.Vanillin protects KSC from UVB irradiation and its effects may occur through the suppression of downstream step of MDM…	Abraham DJ, et al. Blood, 1991, 77(6), 1334-1341.
T3243	Betaine	trimethylglycine;glycine betaine;lycine;oxyneurine;Abromine	甜菜碱	黄芪	透解祛瘟颗粒	107-43-7	Alkaloids	C[N+](C)(C)CC(=O)[O-]	C5H11NO2	117.15	Others	Others	Others	Betaine is a methyl derivative of glycine first isolated from sugar beets. It has been shown to have potential benefits for fighting heart disease, improving body composition, and helping promote muscle gain and fat loss because of its abilities to promote protein synthesis in the body.	Kim DH, et al. Effect of betaine on hepatic insulin resistance through FOXO1-induced NLRP3 inflammasome. J Nutr Biochem. 2017 Apr 22;45:104-114.
T2861	Tyrosol	4-Hydroxyphenylethanol;4-Hydroxyphenethyl alcohol;2-(4-Hydroxyphenyl)ethanol	酪醇	红景天	连花清瘟胶囊	501-94-0	Phenols	c1cc(ccc1CCO)O	C8H10O2	138.07	oxidation-reduction	Antioxidant	Antioxidant	Tyrosol is a phenolic antioxidant that is naturally present in several foods such as wines and green tea and is present most abundantly in olives.	Chandramohan R, Pari L, Rathinam A, Sheikh BA. Chem Biol Interact. 2015 Mar 5;229:44-54.
T2S0122	Mandelic acid	D-(-)-Mandelic acid;(R)-(-)-Mandelic acid;R-(−)-Mandelic Acid;D-(−)-Mandelic Acid	扁桃酸；D-扁桃酸;R-扁桃酸;D-苦杏仁酸;苯基乙醇酸	苦杏仁	连花清瘟胶囊	611-71-2	Carboxylic Acids	O[C@@H](C(O)=O)c1ccccc1	C8H8O3	152.14	Others	Others	Others	It has the health function of killing sperm, reducing Yin, inhibiting bacteria, anti-inflammation and enhancing vagina self-cleaning.	Fu Y, Wang L, Qiao C, et al. Enantioselective recognition of chiral mandelic acid in the presence of Zn(II) ions by l -cysteine-modified electrode[J]. Sensors & Actuators B Chemical, 2011, 155(1):140-144.
T9115	Vanillic Acid	4-hydroxy-3-methoxybenzoic acid;Acide vanillique;Vanillate	香草酸	川芎	血必净注射液	121-34-6	Others	Oc1ccc(cc1OC)C(=O)O	C8H8O4	168.15	Others	Others	Others	Vanillic acid is used as a condiment in food，which used in wine and vinegar. It is an intermediate in the production of vanillin from ferulic acid.	Vishnu KV., et al. Microencapsulation of sardine oil: Application of vanillic acid grafted chitosan as a bio-functional wall material. Carbohydr Polym. 2017 Oct 15;174:540-548.
T2S0633	Raspberry ketone	4-(4-Hydroxyphenyl)-2-butanone;Aloenin;p-Hydroxybenzyl acetone;Frambinone;Rasketone;Oxyphenalon	覆盆子酮	大黄	连花清瘟胶囊	5471-51-2	Ketone	CC(=O)CCc1ccc(O)cc1	C10H12O2	164.2	Others	Others	Others	1. 4-(4-Hydroxyphenyl)-2-butanone(RK) is cytotoxic to melanocytes through the binding of RK-derived quinones to thiol proteins and the pro-oxidant activity of the RK-oligomer, the exposure of human skin to RK can cause chemical/occupational leukoderma. 2. 4-(4-Hydroxyphenyl)-2-butanone is marketed on the Internet as a food supplement.	Ito S, Hinoshita M, Suzuki E, et al. The Tyrosinase-Catalyzed Oxidation of the Leukoderma-inducing Agent Raspberry Ketone Produces (E)-4-(3-oxo-1-butenyl)-1,2-benzoquinone: Implications for Melanocyte Toxicity[J]. Chemical Research in Toxicology, 2017, 30(3):859.
T0433	Artesunate	WR-256283	青蒿琥酯	青蒿	热毒宁注射液；透解祛瘟颗粒；金花清感颗粒	88495-63-0	Terpenoids	C[C@@H]1CC[C@H]2[C@@H](C)[C@H](OC(=O)CCC(O)=O)O[C@@H]3O[C@@]4(C)CC[C@@H]1[C@@]23OO4	C19H28O8	384.42	JAK/STAT signaling; Stem Cells	STAT inhibitor	STAT	Artesunate is part of the artemisinin group of drugs that treat malaria. It is a semi-synthetic derivative of artemisinin that is water-soluble and may therefore be given by injection. It is on the World Health Organization's List of Essential Medicines.	Xu N, et al. Int J Med Sci. 2015, 12(6):524-529.
T0878	Diosmin	Barosmin;Venosmine;Diosmil	地奥司明（7-芸香糖甙）	枳实	清肺排毒汤	520-27-4	Glycosides	C[C@H]1[C@@H]([C@H]([C@H]([C@@H](O1)OC[C@@H]1[C@H]([C@@H]([C@H]([C@@H](O1)Oc1cc(c2c(c1)oc(cc2=O)c1cc(c(cc1)OC)O)O)O)O)O)O)O)O	C28H32O15	608.54	Neuroscience	Norepinephrine	Norepinephrine (NE)	Diosmin is a bioflavonoid that strengthens vascular walls.	Veverková L, et al. Rozhl Chir. 2005 Aug;84(8):410-2, 414-6.
T0877	Gallic acid	3,4,5-Trihydroxybenzoic acid;Gallate;Benzoic acid	没食子酸	赤芍	血必净注射液	149-91-7	Phenols	OC(=O)c1cc(O)c(O)c(O)c1	C7H6O5	170.12	Immunology/Inflammation	ROS	ROS	Gallic acid is found in almost all plants. Plants known for their high gallic acid content include gallnuts,grapes,tea,hops and oak bark.	Nabavi SF, et al. Arh Hig Rada Toksikol. 2013, 64(4):553-9.
T0064	Adenine	Vitamin B4;6-Aminopurine	腺嘌呤	茯苓	清肺排毒汤	73-24-5	Others	Nc1ncnc2c1[nH]cn2	C5H5N5	135.13	Neuroscience	AChR inhibitor	Adenine phosphoribosyltransferase	Adenine, a purine derivative, is a nucleobase with various roles in biochemistry including cellular respiration, in the form of both the energy-rich ATP and NAD and FAD, and protein synthesis, as a chemical component of DNA and RNA.	Barrett C, et al. Assay Drug Dev Technol. 2006 Dec;4(6):661-9.
T1391	4-Methylumbelliferone	4-MU;Hymecromone	胆通	虎杖	清肺达原颗粒（肺炎1号）	90-33-5	Coumarins	Cc1cc(=O)oc2c1ccc(O)c2	C10H8O3	176.17	Others	Others inhibitor	ASST	Hymecromone is a coumarin derivative possessing properties as a spasmolytic, choleretic and light-protective agent. It is also used in ANALYTICAL CHEMISTRY TECHNIQUES for the determination of NITRIC ACID.	Berman HM, et al. Nucleic Acids Res. 2000 Jan 1;28(1):235-42.
T1407	L-Menthol	(-)-Menthol;Levomenthol;Menthomenthol;Menthacamphor	薄荷冰	薄荷	银翘散	2216-51-5	Alcohols	CC(C)[C@@H]1CC[C@@H](C)C[C@H]1O	C10H20O	156.27	Endocrinology/Hormones; GPCR/G Protein; Neuroscience	Opioid Receptor activator	Opioid Receptor; κ-opioid receptor	L-Menthol is a levo isomer of menthol, an organic compound made synthetically or obtained from peppermint or mint oils with flavoring and local anesthetic properties. When added to pharmaceuticals and foods, menthol functions as a fortifier for peppermint flavors. It also has a counterirritant effect on skin and mucous membranes, thereby producing a local analgesic or anesthetic effect.	Lu HF, et al. In Vivo. 2007, 21(2):285-9.
T0632	Gallic acid trimethyl ether	Trimethylgallic Acid;3,4,5-Trimethoxybenzoic acid;Eudesmic acid;Tri-O-methylgallic acid;Benzoic acid	3,4,5-三甲氧基苯甲酸	芍药	清肺达原颗粒（肺炎1号）	118-41-2	Phenols	COc1cc(cc(OC)c1OC)C(=O)O	C10H12O5	212.2	oxidation-reduction	Antioxidant	Antioxidant	Gallic acid trimethyl ether are potent antioxidants and inhibitor of cytokine production. It can ameliorate chronic stress-induced various behavioral and biochemical alterations in mice. It also exerts hepatoprotective effects in CCl4-induced rats, specifically by modulating oxidative-nitrosative stress and inflammation.	Dhingra MS, et al. Effect of trimethylgallic acid esters against chronic stress-induced anxiety-like behavior and oxidative stress in mice. Pharmacol Rep. 2014 Aug;66(4):606-12.
T3730	Methyl gallate	NSC 363001;Gallincin;Gallic acid methyl ester;Gallicin	没食子酸甲酯	麻黄	清肺排毒汤	99-24-1	Phenols	COC(=O)c1cc(c(c(c1)O)O)O	C8H8O5	184.14	Microbiology&Virology	Reverse Transcriptase inhibitor	Reverse Transcriptase	Methyl gallate is a reverse transcriptase inhibitor with antioxidant, anti-HIV-1 and HIV-1 enzyme inhibition activities.	Wang CR,et al. Environ Toxicol Pharmacol. 2014 Mar;37(2):626-37.

## Sheet: M26716
ID	Name	Synonyms	Chinese Name	Source	方剂来源	CAS	Category	SMILES	Formula	MolWt	Pathways	Target	Receptor	Bioactivity	Reference
T2175	Apigenin	Apigenol;C.I. Natural Yellow 1;4',5,7-Trihydroxyflavone;NSC 83244;LY 080400	芹菜素	红花	血必净注射液	520-36-5	Flavonoid	Oc1ccc(cc1)c1cc(=O)c2c(O)cc(O)cc2o1	C15H10O5	270.24	Metabolism	P450 inhibitor	CYP2C9	Chamomile is an aromatic oil extracted from the flowers or leaves of the daisy-like plants. Extracts, oils and teas made from chamomile are used for its soothing qualities as a sedative, mild analgesic and sleep medication. Chamomile has not been implicated in causing serum enzyme elevations or clinically apparent liver injury.	Lin JK, et al. J Cell Biochem Suppl, 1997, 28-29, 39-48.
T3S2072	n-Butylidenephthalide	3-Butylidenephthalide;Butylidene phthalide	丁烯基苯酞；丁烯基酞内酯	川芎	血必净注射液	551-08-6	Miscellaneous	CCCC=C1OC(=O)c2ccccc12	C12H12O2	188.22	Metabolism	Glucokinase	α-glucosidase	1. (Z)-3-butylidenephthalide has antihyperglycemic effect is due to inhibition of α-glucosidase at the intestinal level, inhibited the activity of yeast-α-glucosidase (IC(5) 2.35 mM) in a noncompetitive fashion with a K(i) of 4.86 mM.	Saw C L L , Qing W , Zheng-Yuan S , et al. Effects of natural phytochemicals in Angelica sinensis (Danggui) on Nrf2-mediated gene expression of phase II drug metabolizing enzymes and anti-inflammation[J]. Biopharmaceutics & Drug Disposition, 2014, 34(6):303-311.
T2S0164	Palmitic acid ethyl ester	Ethyl palmitate;Ethyl hexadecanoate;Ethyl cetylate	棕榈酸乙酯	金银花	连花清瘟胶囊；热毒宁注射液；痰热清注射液；透解祛瘟颗粒；透解祛瘟颗粒；金花清感颗粒	628-97-7	Esters	CCCCCCCCCCCCCCCC(=O)OCC	C18H36O2	284.48	Others	Others	Others	Used as softener and lubricant.	Fidler, N., et al.: J. Lipid Res., 41, 1376 (2000)
T3S1866	Propyl gallate	Gallic acid propyl esterZ;n-Propyl gallate;Tenox PG	没食子酸丙酯;3,4,5-三羟基苯甲酸丙酯、倍酸丙酯、五倍子酸丙酯	芍药	清肺达原颗粒（肺炎1号）	121-79-9	Esters	CCCOC(=O)c1cc(O)c(O)c(O)c1	C10H12O5	212.2	oxidation-reduction	Antioxidant	Antioxidant	Propyl gallate is an antioxidant used in foods especially animal fats and vegetable oils, also in a wide variety of cosmetics and beauty care products.	Jen-Tsung Yang, et al. Journal of Immunology Research. 2017.
T2S0850	Malic acid	FDA 2018;Hydroxybutanedioic acid;E 296;2-Hydroxysuccinic acid;Pomalus acid;Deoxytetraric acid	苹果酸	乌梅	透解祛瘟颗粒	6915-15-7	Miscellaneous	OC(CC(O)=O)C(O)=O	C4H6O5	134.08	Others	Others	Others	1. Malic acid did reduce populations of L. monocytogenes on poultry. 2. Malic acid supplementation may be useful for conservative treatment of calcium renal stone disease by virtue of its capacity to induce these effects.	Gonzálezfandos E, Herrera B. Efficacy of malic acid against attached to poultry skin during refrigerated storage[J]. Poultry Science, 2006, 101(6):1331-1339.
T2O2728	glycine	2-Aminoacetic acid;Aminoacetic acid;Glycocoll;Glycolixir;Glycosthene	甘氨酸	党参	清肺达原颗粒（肺炎1号）	56-40-6	Amino Acids	NCC(O)=O	C2H5NO2	75.06	Membrane Transporter/Ion Channel;Metabolic Enzyme/Protease;Neuroscience;Proteases/Proteasome	Endogenous Metabolite;iGluR;MMP	Endogenous Metabolite; iGluR;MT2 receptor;MT1 receptor	Glycine is a non-essential amino acid. It is found primarily in gelatin and silk fibroin and used therapeutically as a nutrient. It is also a fast inhibitory neurotransmitter.	Johnson JW, et al. Glycine potentiates the NMDA response in cultured mouse brain neurons. Nature. 1987 Feb 5-11;325(6104):529-31.
T2O2666	Methyl stearate	Methyl Octadecanoate;Stearic Acid methyl ester	硬脂酸甲酯	党参	清肺达原颗粒（肺炎1号）	112-61-8	Esters	CCCCCCCCCCCCCCCCCC(=O)OC	C19H38O2	298.51	Others	Others	Others	Methyl stearate is found in cloves. Antifoaming agent and fermentation nutrient.	Arapitsas, P., Scholz, M., Vrhovsek, U., Di Blasi, S., Biondi Bartolini, A., & Masuero, D. et al. (2012). A Metabolomic Approach to the Study of Wine Micro-Oxygenation. Plos ONE, 7(5), e37783. doi: 10.1371/journal.pone.0037783
T2761	Naringin dihydrochalcone	Naringin DC	柚皮甙二氢查尔酮	枳实	清肺排毒汤	18916-17-1	Glycosides	C[C@H]1[C@@H]([C@H]([C@H]([C@@H](O1)O[C@@H]1[C@H]([C@@H]([C@H](O[C@H]1Oc1cc(c(c(c1)O)C(=O)CCc1ccc(cc1)O)O)CO)O)O)O)O)O	C27H34O14	582.55	Metabolism	P450	CYP	Naringin Dihydrochalcone(Naringin DC) is an inhibitor of CYP enzymes, used as an artificial sweetener.	Shin W, et al. J Med Chem, 1995, 38(21), 4325-4331.
T2719	Succinic acid	Wormwood acid;1,4-Butandioic Acid;1,2-Ethanedicarboxylic acid;Amber acid;Asuccin;Butanedioic acid	琥珀酸	半夏	小柴胡汤	110-15-6	Miscellaneous	OC(=O)CCC(O)=O	C4H6O4	118.09	Metabolic Enzyme/Protease	Endogenous Metabolite	Endogenous Metabolite	Succinic acid is a water-soluble, colorless crystal with an acid taste that is used as a chemical intermediate, in medicine, the manufacture of lacquers, and to make perfume esters. It is also used in foods as a sequestrant, buffer, and a neutralizing agent.	Sanjeeva Gandhi M, Mok YS. Chemosphere. 2014 Dec;117:440-6.
T2908	Palmitic acid	Hexadecoic acid;hexadecanoic acid;Cetylic acid	棕榈酸	红花	血必净注射液	57-10-3	Miscellaneous	CCCCCCCCCCCCCCCC(=O)O	C16H32O2	256.42	Metabolic Enzyme/Protease	Endogenous Metabolite	Endogenous Metabolite	Palmitic acid is the most common saturated fatty acid found in animals, plants and microorganisms with anti-tumor activity.	Nagata Y, et al. Leuk Res. 2015 Jun;39(6):638-45.
T2215	Ferulic Acid	Coniferic acid;Fumalic Acid	阿魏酸	川芎	血必净注射液	1135-24-6	Others	COC1=C(C=CC(=C1)/C=C/C(=O)O)O	C10H10O4	194.19	Angiogenesis; Tyrosine Kinase/Adaptors	FGFR inhibitor	FGFR1	Ferulic Acid is a highly abundant phenolic phytochemical and a type of organic compound found in the Ferula assafoetida L. or Ligusticum chuanxiong.It can be absorbed by the small intestine and excreted through the urine.	Yang GW, et al. Int J Mol Sci. 2015 Oct 12;16(10):24011-31.
T2847	Indigo	Indigotin	青黛	大青叶	透解祛瘟颗粒	482-89-3	Others	O=C1c2ccccc2N\C1=C1\Nc2ccccc2C1=O	C16H10O2N2	262.26	Others	Others	Others	Indigo is extracted from Indigo blue.	Margetis K, et al. J Neurosurg. 2015 Jan;122(1):40-8.
T2S1865	Octyl gallate	Progallin O;Stabilizer GA-8;Gallic acid octyl ester;Octyl 3,4,5-trihydroxybenzoate;n-Octylgallate	没食子酸辛酯	红景天	连花清瘟胶囊	1034-01-1	Esters	CCCCCCCCOC(=O)c1cc(O)c(O)c(O)c1	C15H22O5	282.33	oxidation-reduction;Microbiology&virology	Antioxidant;Antifungal	Antioxidant;Antifungal	1. Octyl Gallate is an antioxidant approved by the US Food and Drug Administration (FDA) as a food additive. 2. Octyl Gallate has antimetastatic activity. 3. Octyl Gallate shows antimicrobial activity against H. pylori, with a minimum inhibitory concentration (MIC) value of 125 ug/mL. 4. Combination therapy with octyl gallate and ferulic acid improves cognition and neurodegeneration in a transgen…	Sales, SM , Roy, A , Antony, L , et al. Octyl gallate and gallic acid isolated from, Terminalia bellarica, regulates normal cell cycle in human breast cancer cell lines[J]. Biomedicine & Pharmacotherapy, 2018, 103:1577-1584.
T2740	Cinnamic acid	trans-3-Phenylacrylic acid;Myricitrine;Phenylacrylic acid;Cinnamylic acid;3-Phenylacrylic acid;Isocinnamic acid	肉桂酸	桂枝	清肺排毒汤	140-10-3	Others	c1ccc(cc1)/C=C/C(=O)O	C9H8O2	148.16	Microbiology&Virology	Antibacterial	Antibacterial	Cinnamic acid exerts anti-diabetic activity by improving glucose tolerance in vivo and by stimulating insulin secretion in vitro.	Hafizur RM, et al. Phytomedicine. 2015 Feb 15;22(2):297-300.
T2821	Ethyl ferulate	Ferulic acid ethyl ester;Ethyl 4'-hydroxy-3'-methoxycinnamate;Ethyl 3-(4-hydroxy-3-methoxyphenyl)acrylate	乙基阿魏酸	川芎	血必净注射液	4046-02-0	Phenols	CCOC(=O)/C=C/c1cc(c(cc1)O)OC	C12H14O4	222.24	Others	Others	Others	Ethyl ferulate is the alkyl ester derivative of ferulic acid which is a naturally occurring plant product with anti-oxidative, anti-inflammatory, neuroprotective, and antiproliferative activities.	Nazaré AC, et al. Molecules. 2014 Jun 17;19(6):8124-39.
T2728	Limonin	Limonoic acid 3,19:16,17 dilactone;Dictamnolactone;Obaculactone;Citrolimonin	柠檬苦素	枳实	清肺排毒汤	1180-71-8	Others	CC1(C)O[C@H]2CC(=O)OC[C@@]22[C@H]1CC(=O)[C@]1(C)[C@@H]2CC[C@@]2(C)[C@@H](OC(=O)[C@H]3O[C@@]123)c1ccoc1	C26H30O8	470.52	Microbiology&Virology; Proteases/Proteasome	HIV Protease inhibitor	HIV Protease	Limonin is a triterpenoid enriched in citrus fruits, which has antivirus and antitumor ability.	Battinelli L, et al. Planta Med, 2003, 69(10), 910-913.
T2210	Genipin	(+)-Genipin	京尼平	栀子	热毒宁注射液；醒脑静注射液	6902-77-8	Others	COC(=O)C1=CO[C@H]([C@H]2[C@@H]1CC=C2CO)O	C11H14O5	226.23	Others	Others	Cholagogues; Choleretics	Genipin, an active aglycone derived from an iridoid glycoside called geniposide, is found in the fruit of Gardenia jasminoides Ellis.	Ma C, et al. Genipin stimulates glucose transport in C2C12 myotubes via IRS-1 and calcium- dependent mechanism. J Endocrinol. 2012 Dec 20.
T2722	Tetramethylpyrazine	Ligustrazine	四甲基吡嗪	川芎	血必净注射液	1124-11-4	Miscellaneous	Cc1c(nc(c(n1)C)C)C	C8H12N2	136.2	Immunology/Inflammation	Others	Others	Tetramethylpyrazine (ligustrazine, TMP), a natural compound isolated from Chinese herbal medicine Ligusticum wallichii (Chuan Xiong) shows anti-inflammation, antioxidant, antiplatelet, and antiapoptosis activities.	Guan D, et al. J Neurochem. 2015 Aug;134(3):551-65.
T1323	Artemether	Dihydroartemisinin methyl ether;SM224;Dihydroqinghaosu methyl ether;CGP 56696	蒿甲醚	青蒿	热毒宁注射液；透解祛瘟颗粒；金花清感颗粒	71963-77-4	Sesquiterpenes	CO[C@H]1O[C@@H]2O[C@@]3(C)CC[C@H]4[C@H](C)CC[C@@H]([C@H]1C)[C@@]24OO3	C16H26O5	298.38	Microbiology&Virology	Antibiotic	Antibiotic	Artemether is an antimalarial agent used to treat acute uncomplicated malaria.	Ma Y, et al. Antimicrob Agents ChemOthers. 2014 Oct;58(10):5658-65.
T2174	Quercetin	Sophoretin	槲皮素	甘草	连花清瘟胶囊；小柴胡汤	117-39-5	Glycosides	c1(c(O)c(=O)c2c(O)cc(O)cc2o1)c1cc(O)c(O)cc1	C15H10O7	302.24	PI3K/Akt/mTOR signaling	PI3K inhibitor	PI3Kγ; PI3Kδ	Quercetin, a natural flavonoid present in vegetables, fruit, and wine, is a stimulator of recombinant SIRT1 and also a PI3K inhibitor.	Navarro-Nunez L, et al. Fitoterapia, 2010, 81(2):75-80.
T4852	Glyceryl trimyristate	Tritetradecanoin;Trimyristoylglycerol;1,2,3-Tritetradecanoylglycerol	甘油三肉豆蔻酸酯	前胡	透解祛瘟颗粒	555-45-3	Glycerolipids	CCCCCCCCCCCCCC(=O)OCC(COC(=O)CCCCCCCCCCCCC)OC(=O)CCCCCCCCCCCCC	C45H86O6	723.16	Metabolic Enzyme/Protease	Endogenous Metabolite	Human Endogenous Metabolite	Within the cell, glyceryl trimyristate is primarily located in the membrane (predicted from logP) and adiposome. glyceryl trimyristate exists in all eukaryotes, ranging from yeast to humans. In humans, glyceryl trimyristate is involved in the metabolic disorder called de novo triacylglycerol biosynthesis glyceryl trimyristate pathway.	Pynn C J, Picardi M V, Nicholson T, et al. Myristate is selectively incorporated into surfactant and decreases dipalmitoylphosphatidylcholine without functional impairment.[J]. Ajp Regulatory Integrative & Comparative Physiology, 2010, 299(5):R1306-16.
T4913	Maleic acid		马来酸	人参	小柴胡汤	110-16-7	Carboxylic acids and derivatives	OC(=O)\C=C/C(O)=O	C4H4O4	116.07	Microbiology&virology	Antibacterial	Glutamate Decarboxylase	Maleic Acid is a Glutamate Decarboxylase (GAD) inhibitor of E. coli and L. monocytogenes.	Fonda ML, et al. Glutamate decarboxylase. Substrate specificity and inhibition by carboxylic acids. Biochemistry. 1972 Mar 28;11(7):1304-9.
T1558	Resveratrol	trans-Resveratrol;SRT 501	白藜芦醇	虎杖	清肺达原颗粒（肺炎1号）	501-36-0	Phenols	Oc1ccc(cc1)\C=C\c1cc(O)cc(O)c1	C14H12O3	228.24	Chromatin/Epigenetic; Immunology/Inflammation; DNA Damage/DNA Repair; Metabolism; NF-Κb; Neuroscience	COX; DNA/RNA Synthesis; IκB/IKK; Lipoxygenase; NADPH; Sirtuin	COX-1; COX-2; DNA polymerase α; IKKβ; LOX; Quinone reductase 2; SIRT1; SIRT2	Resveratrol is a polyphenolic phytoalexin with antioxidant and chemopreventive activities. It has a wide spectrum of targets including COX, SIRT, LOC, etc.	Jang M, et al. Cancer chemopreventive activity of resveratrol, a natural product derived from grapes. Science. 1997 Jan 10;275(5297):218-20.
T5594	Cedrol		柏木脑	人参	小柴胡汤	77-53-2	Others	C[C@@H]1CC[C@H]2C(C)(C)[C@H]3C[C@@]12CC[C@@]3(C)O	C15H26O	222.37	Metabolism	P450	CYP3A4;CYP2B6	Cedrol is a cedrane sesquiterpenoid and a tertiary alcohol,Cedrol inhibits the cytochrome P450 (CYP) isoforms CYP2B6 and CYP3A4 (Kis = 0.9 and 3.4 μM, respectively)	CHENG, SenSung, CHUNG, et al. Phytochemicals from Cunninghamia konishii Hayata Act as Antifungal Agents[J]. Journal of Agricultural & Food Chemistry, 2012, 60(1):124-8.
T5668	Acetyl-trans-resveratrol		乙酰化白藜芦醇	虎杖	清肺达原颗粒（肺炎1号）	42206-94-0	Phenols	CC(=O)Oc1ccc(cc1)\C=C\c1cc(OC(C)=O)cc(OC(C)=O)c1	C20H18O6	354.35	Stem Cells;Apoptosis	STAT;BCL	STAT3;Mcl-1	Acetyl-trans-resveratrol has anti-cancer activity,it inhibits the phosphorylation of STAT3 and NFκB, down-regulates Mcl-1, and up-regulates Bim and Puma in pancreatic cancer cells.	Duan J J , Yue W , Jianyu E , , et al. In vitro comparative studies of resveratrol and triacetylresveratrol on cell proliferation, apoptosis, and STAT3 and NFκB signaling in pancreatic cancer cells[J]. Scientific Reports, 2016, 6:31672.
T1273	Diacerein	Diacetylrhein;Diacerhein;Fisiodar	双醋瑞因	大黄	连花清瘟胶囊	13739-02-1	Anthraquinones	CC(=O)Oc1cccc2c1C(=O)c1c(OC(=O)C)cc(cc1C2=O)C(=O)O	C19H12O8	368.29	Immunology/Inflammation	IL Receptor inhibitor	IL-1β	Diacerein is a prodrug which is metabolized to rhein. It is currently approved in France for the treatment of osteoarthritis although the use of diacerein is restricted due to the side effects including sevre diarrhea [L780]. Diacerein is under investigation for the treatment of Insulin Resistance, Diabetes Mellitus (Type 2), and Diabetes-Related Complications.	Yaron M, et al. Osteoarthritis Cartilage, 1999, 7(3), 272-280.
T2136	Geniposidic Acid		京尼平甙酸	栀子	热毒宁注射液；醒脑静注射液	27741-01-1	Glycosides	[C@@H]1([C@H]2[C@@H](C(=CO1)C(=O)O)CC=C2CO)O[C@H]1[C@H](O)[C@@H](O)[C@H](O)[C@H](O1)CO	C16H22O10	374.34	Immunology/Inflammation	Others	Others	Geniposidic acid, an iridoid glucoside, used in therapy of jaundice, inflammation and hepatic disorders.	Hsu HY, et al. Cancer Lett,1997, 113(1-2), 31-37.
T3018	Protocatechualdehyde	Protocatechuic aldehyde;Rancinamycin IV;Catechaldehyde;3,4-Dihydroxybenzaldehyde	3,4-二羟基苯甲醛;原儿茶醛	丹参	血必净注射液	139-85-5	Phenols	c1cc(c(cc1C=O)O)O	C7H6O3	138.12	Others	Others	Others	Protocatechualdehyde, a natural polyphenol compound isolated from the roots of radix Salviae Miltiorrhizae, is associated with a wide variety of biological activities and has been widely used in medicine as an antioxidant, anti-aging, an antibacterial and anti-inflammatory agent.	Kono R, et al. Acta Histochem Cytochem. 2014 Jun 28;47(3):103-12.
T3020	Sclareol		香紫苏醇	丹参	血必净注射液	515-03-7	Terpenoids	C[C@@](O)(CC[C@H]1[C@](C)(O)CC[C@H]2C(C)(C)CCC[C@]12C)C=C	C20H36O2	308.51	Others	Others inhibitor	Others	Sclareol, a labdane-type diterpene isolated from clary sage (Salvia sclarea), exerts growth inhibition and cytotoxic activity against a variety of human Y cell lines.	Dimas K, et al. Biomed Pharmacother, 2006, 60(3), 127-133.
T2198	Arecoline HBr	Arecoline bromide;Arecoline hydrobromide	氢溴酸槟榔碱	槟榔	清肺达原颗粒（肺炎1号）	300-08-3	Alkaloids	CN1CCC=C(C1)C(=O)OC.Br	C8H13NO2·HBr	236.11	Neuroscience	AChR antagonist	mAChR	Arecoline Hydrobromide is a muscarinic acetylcholine receptor agonist.	Ghelardini, C., et al., M1 receptor activation is a requirement for arecoline analgesia. Farmaco, 2001. 56(5-7): p. 383-5.
T2907	Tanshinone I	Tanshinone A	丹参酮I	丹参	血必净注射液	568-73-0	Ketone	Cc1cccc2c1ccc1c2C(=O)C(=O)c2c1occ2C	C18H12O3	276.29	Metabolism	Phospholipase inhibitor	PLA2	Tanshinone I, an active principle isolated from the herbal medicine Salvia miltiorrhiza, displays cytotoxicity against tumor cells.	Kim SY, et al. Phytother Res, 2002, 16(7), 616-620.
T2889	Isoferulic acid	3-Hydroxy-4-methoxycinnamic acid;Hesperetic acid;Hesperetate;Isoferulate	异阿魏酸	丹参	血必净注射液	537-73-5	Glycosides	COc1c(cc(cc1)/C=C/C(=O)O)O	C10H10O4	194.18	GPCR/G Protein	Adrenergic Receptor	Adrenergic Receptor	3-Hydroxy-4-methoxycinnamic Acid exhibits hypoglycemic properties.	Meeprom A, et al. BMC Complement Altern Med. 2015 Oct 5;15(1):346.
T2950	Schisandrin	Schizandrol-A;Wuweizi alcohol-A;Wuweizichun-A;Schizandrol	五味子醇甲	五味子	生脉注射液	7432-28-2	Phenylpropanoids	c12c(c3c(C[C@@H]([C@](C1)(O)C)C)cc(c(c3OC)OC)OC)c(c(c(c2)OC)OC)OC	C24H32O7	432.51	Autophagy	Autophagy	Autophagy	Schisandrin is a compound with anti-asthmatic, anti-cancer, and anti-inflammatory effects.	Guo CX, et al. Pharmazie. 2015 Jan;70(1):29-32.
T6S1537	Cryptochlorogenic acid	4-O-Caffeoylquinic acid;4-Caffeoylquinic acid	隐绿原酸	金银花	连花清瘟胶囊；热毒宁注射液；痰热清注射液；透解祛瘟颗粒；透解祛瘟颗粒；金花清感颗粒	905-99-7	Phenylpropanoids	O[C@@H]1C[C@@](O)(C[C@@H](O)[C@H]1OC(=O)\C=C\c1ccc(O)c(O)c1)C(O)=O	C16H18O9	354.31	oxidation-reduction	Antioxidant	Antioxidant	1. Cryptochlorogenic acid has antioxidant activity.	Nakatani N , Kayano S I , Kikuzaki H , et al. Identification, quantitative determination, and antioxidative activities of chlorogenic acid isomers in prune (Prunus domestica L. )[J]. J Agric Food Chem, 2000, 48(11):5512-5516.
T2846	Isoimperatorin		异欧前胡素	丹参	血必净注射液	482-45-1	Phenylpropanoids	CC(=CCOc1c2ccc(=O)oc2cc2c1cco2)C	C16H14O4	270.28	Neuroscience	AChR inhibitor	AChE	Isoimperatorin is an anti-inflammatory agent, exhibits significant inhibitory effects on acetylcholinesterase (AChE).	Kim DK, et al. Acetylcholinesterase inhibitors from the roots of Angelica dahurica. Arch Pharm Res. 2002 Dec;25(6):856-9.
T2881	Hydroxyecdysone	20-Hydroxyecdysone;B-ecdysone,Commisterone;B-ecdysone;Commisterone;Ecdysterone	羟基蜕皮激素	人参	小柴胡汤	5289-74-7	Steroids	C1[C@@H]([C@@H](C[C@H]2C(=O)C=C3[C@@]4(CC[C@@H]([C@]4(CC[C@@H]3[C@@]12C)C)[C@](C)([C@@H](CCC(C)(C)O)O)O)O)O)O	C27H44O7	480.65	Others	Others	Others	20-Hydroxyecdysone is a steroid hormone that regulates the processes of molting or ecdysis in insects.	Kizelsztein P, et al. Am J Physiol Endocrinol Metab, 2009, 296(3), E433-439.
T2738	Dehydroandrographolide		脱水穿心莲内酯	穿心莲	喜炎平注射液	134418-28-3	Terpenoids	C[C@@]1(CO)[C@H](O)CC[C@@]2(C)[C@H](C\C=C3/C=COC3=O)C(=C)CC[C@H]12	C20H28O5	348.43	Immunology/Inflammation	NOS activator	iNOS	Dehydroandrographolide is a natural compound extracted from herbal medicine Andrographis paniculata (Burm f) Nees.	Hsieh MJ, et al. Oncotarget. 2015 Oct 13;6(31):30831-49.
T2919	Sesamin	Fagarol;Fsesamin	芝麻素	玄参	透解祛瘟颗粒	607-80-7	Phenylpropanoids	C1[C@H]2[C@H](CO[C@@H]2c2cc3c(cc2)OCO3)[C@H](O1)c1cc2c(cc1)OCO2	C20H18O6	354.36	Others	Others	Others	Sesamin is a lignan extracted from Sesamum indicum L.	Shimizu S, et al. Lipids, 1991, 26(7), 512-516.
T2717	Salidroside	Rhodioloside	红景天苷	红景天	连花清瘟胶囊	10338-51-9	Glycosides	c1cc(ccc1CCO[C@H]1[C@@H]([C@H]([C@@H]([C@H](O1)CO)O)O)O)O	C14H20O7	300.3	PI3K/Akt/mTOR	mTOR	mTOR	Salidroside is a bioactive phenolic glycoside compound isolated from Rhodiola crenulata. It is a prolyl endopeptidase Inhibitor.	Hu X, et al. Cell Biol Toxicol, 2010, 26(6), 499-507.
T2807	Caffeic Acid		咖啡酸	红花	血必净注射液	331-39-5	Phenols	OC(=O)\C=C\c1ccc(O)c(O)c1	C9H8O4	180.16	Membrane Transporter/Ion Channel; Metabolic Enzyme/Protease	Lipoxygenase; Endogenous Metabolite; TRP/TRPV Channel	5-Lipoxygenase; Endogenous Metabolite; hTRPA1	Caffeic Acid is an orally bioavailable, hydroxycinnamic acid derivative and polyphenol, with potential anti-oxidant, anti-inflammatory, and antineoplastic activities.	Pradhananga S, Shim WS. Eur J Pharmacol. 2015 Sep 5;762:313-21.
T1714	Eucalyptol	1,8-Cineole;cajeputol;1,8-epoxy-p-menthane;cineol;cineole	桉油精	细辛	清肺排毒汤	470-82-6	Alcohols	CC12CCC(CC1)C(C)(C)O2	C10H18O	154.25	Apoptosis; GPCR/G Protein; Immunology/Inflammation; Membrane Transporter/Ion Channel; Neuroscience	5-HT Receptor;IL Receptor; Potassium Channel; TNF Receptor	5-HT; IL-1β; Potassium Channel; TNF-α	Eucalyptol is a natural organic compound which is a colorless liquid. It is a cyclic ether and a monoterpenoid. Eucalyptol is an ingredient in many brands of mouthwash and cough suppressant. It controls airway mucus hypersecretion and asthma via anti-inflammatory cytokine inhibition. Eucalyptol is an effective treatment for nonpurulent rhinosinusitis. Eucalyptol reduces inflammation and pain when…	Zeraatpisheh Z, Vatanparast J. Eur J Pharmacol. 2015 Oct 5;764:70-8.
T2720	Ginsenoside Rc	Panaxoside Rc	人参皂苷Rc	人参	小柴胡汤	11021-14-0	Glycosides	C\C(C)=C/CC[C@](C)(O[C@@H]1O[C@H](CO[C@@H]2O[C@@H](CO)[C@H](O)[C@H]2O)[C@@H](O)[C@H](O)[C@H]1O)[C@H]1CC[C@]2(C)[C@@H]1[C@H](O)C[C@@H]1[C@@]3(C)CC[C@H](O[C@@H]4O[C@H](CO)[C@@H](O)[C@H](O)[C@H]4O[C@@H]4O[C@H](CO)[C@@H](O)[C@H](O)[C@H]4O)C(C)(C)[C@@H]3CC[C@@]21C	C53H90O22	1079.27	Others	Others inhibitor	Others	Ginsenoside Rc is one of the ginsenosides from Panax ginseng, inhibits the expression of TNF-α and IL-1β.	Yang JW, Kim SS. Molecules. 2015 Jan 14;20(1):1293-303.
T2985	Gypenoside XLIX		绞股蓝皂苷XLIX	人参	小柴胡汤	94987-08-3	Glycosides	C[C@@H]1O[C@@H](O[C@H]2[C@H](O[C@H]3CC[C@@]4(C=O)[C@@H](CC[C@]5(C)[C@@H]4CC[C@@H]4[C@H](CC[C@@]54C)[C@@](O)(CC\C=C(/C)C)CO[C@@H]4O[C@H](CO)[C@@H](O)[C@H](O)[C@H]4O)C3(C)C)OC[C@H](O)[C@@H]2O[C@@H]2OC[C@@H](O)[C@H](O)[C@H]2O)[C@H](O)[C@H](O)[C@H]1O	C52H86O21	1047.23	Metabolism	PPAR activator	PPARα	Extracted from whole herb of Gynostemsma pentaphyllum(Thunb.)Mak.;Store the product in sealed, cool and dry condition	Huang TH, et al. Eur J Pharmacol. 2007 Jun 22;565(1-3):158-65.
T5S0331	Isoliquiritin	Neoisoliquritin	异甘草苷	甘草	连花清瘟胶囊；小柴胡汤	5041-81-6	Chalcones	OC[C@H]1O[C@@H](Oc2ccc(\C=C\C(=O)c3ccc(O)cc3O)cc2)[C@H](O)[C@@H](O)[C@@H]1O	C21H22O9	418.39	Apoptosis	p53	p53	1. Isoliquiritin has antitussive effects. 2. Isoliquiritin has antidepressant-like effects. 3. Isoliquiritin, liquiritin and isoliquirigenin inhibits the p53-dependent pathway and shows crosstalk between Akt activities.	Ho, Wing. Combination of liquiritin, isoliquiritin and isoliquirigenin induce apoptotic cell death through upregulating p53 and p21 in the A549 non-small cell lung cancer cells[J]. Oncology Reports, 2013.
T3367	Macranthoidin B	Macranthoiside I	灰毡毛忍冬皂苷乙	金银花	连花清瘟胶囊；热毒宁注射液；痰热清注射液；透解祛瘟颗粒；透解祛瘟颗粒；金花清感颗粒	136849-88-2	Triterpenoids	C[C@@H]1O[C@@H](O[C@@H]2[C@@H](O)[C@@H](O)CO[C@H]2O[C@H]2CC[C@@]3(C)C(CC[C@]4(C)[C@@H]3CC=C3[C@@H]5CC(C)(C)CC[C@@]5(CC[C@@]43C)C(=O)O[C@@H]3O[C@H](CO[C@@H]4O[C@H](CO)[C@@H](O)[C@H](O)[C@H]4O)[C@@H](O)[C@H](O)[C@H]3O)[C@]2(C)CO)[C@H](O)[C@H](O[C@@H]2O[C@H](CO)[C@@H](O[C@@H]3O[C@H](CO)[C@@H](O)[C@H](O)[C@H]3O)[C@H](O)[C@H]2O)[C@H]1O	C65H106O32	1399.53	Others	Others	Others	Macranthoidin B, a saponin extracted from Flos Lonicerae is a main bioactive saponin in rat plasma (p.o.).	Chen CY, et al.J Chromatogr B Analyt Technol Biomed Life Sci. 2009 Jan 15;877(3):159-65.;
T3394	Timosaponin BII	Prototimosaponin A III	知母皂苷BII	知母	清肺达原颗粒（肺炎1号）	136656-07-0	Steroids	C[C@@H](CCC1(O)O[C@H]2C[C@H]3[C@@H]4CC[C@@H]5C[C@H](CC[C@]5(C)[C@H]4CC[C@]3(C)[C@H]2[C@@H]1C)O[C@@H]1O[C@H](CO)[C@H](O)[C@H](O)[C@H]1O[C@@H]1O[C@H](CO)[C@@H](O)[C@H](O)[C@H]1O)CO[C@@H]1O[C@H](CO)[C@@H](O)[C@H](O)[C@H]1O	C45H76O19	920.07	Neuroscience; Others	BACE inhibitor; Beta Amyloid inhibitor; Others inhibitor	BACE1; Aβ; β-CTF	Timosaponin BII has anti-dementia activity and may be useful for the treatment of type 2 diabetes. Timosaponin BII has antioxidant activity, can inhibit the up-regulation of BACE1 and reduced the over-production of β-CTF and Aβ in rat retina, which was induced by FeCl₃.	Huang JF, et al. BMC Complement Altern Med. 2012 Oct 22;12:189.
T3427	Polydatin	Piceid;Polydotin Peceid	虎杖苷	虎杖	清肺达原颗粒（肺炎1号）	27208-80-6	Polyphenols	c1cc(ccc1/C=C/c1cc(cc(c1)O[C@H]1[C@@H]([C@H]([C@@H]([C@H](O1)CO)O)O)O)O)O	C20H22O8	390.39	NF-Κb	NF-κB inhibitor	NF-κB	Polydatin, the glycoside of Resveratrol, is originally isolated from the Chinese herb Polygonum cuspidatum. The compound can inhibit platelet aggregation and elevate the ratios of LDL-C/HDL-C and TC/HDL-C. In the myocardial cell, white blood cell, vascular smooth muscle cell, and endothelial cell, Polydatin can inhibit ICAM-1 expression, elevate Ca2+, weaken white blood cell-endothelial cell adhe…	Cheng Y, et al. Involvement of cell adhesion molecules in polydatin protection of brain tissues from ischemia-reperfusion injury. Brain Res. 2006 Sep 19;1110(1):193-200.
T3858	macranthoidin A		灰毡毛忍冬皂苷甲	金银花	连花清瘟胶囊；热毒宁注射液；痰热清注射液；透解祛瘟颗粒；透解祛瘟颗粒；金花清感颗粒	140360-29-8	Triterpenoids	C[C@H]1[C@@H]([C@H]([C@H]([C@@H](O1)O[C@@H]1[C@H]([C@H](CO[C@H]1O[C@H]1CC[C@]2([C@H]([C@]1(C)CO)CC[C@@]1([C@@H]2CC=C2[C@]1(CC[C@@]1([C@H]2CC(CC1)(C)C)C(=O)O[C@H]1[C@@H]([C@H]([C@@H]([C@H](O1)CO[C@H]1[C@@H]([C@H]([C@@H]([C@H](O1)CO)O)O)O)O)O)O)C)C)C)O)O)O)O[C@H]1[C@@H]([C@H]([C@@H]([C@H](O1)CO)O)O)O)O	C59H96O27	1237.39	Others	Others	Others	Macranthoidin A has anti-inflammation activity.	Chai XY,et al. Quality evaluation of Flos lonicerae through a simultaneous determination of seven saponins by HPLC with ELSD. J Chromatogr A. 2005 Apr 8;1070(1-2):43-8.
T3889	Platycodin D		桔梗皂苷 D	桔梗	生脉注射液	58479-68-8	Triterpenoids	C1C(CC[C@@]2([C@@H](C[C@@]3([C@@]4(CC[C@H]5C([C@H]([C@H](C[C@@]5(C4CC=C3[C@H]12)C)O)O[C@@H]1O[C@@H]([C@H]([C@@H]([C@H]1O)O)O)CO)(CO)CO)C)C)O)C(=O)O[C@@H]1OC[C@@H]([C@@H]([C@H]1O[C@@H]1O[C@H]([C@@H]([C@H]([C@H]1O)O)O[C@@H]1OC[C@H]([C@@H]([C@H]1O)O[C@@H]1OC[C@@]([C@H]1O)(CO)O)O)C)O)O)(C)C	C57H92O28	1225.34	GPCR/G Protein	Prostaglandin Receptor inhibitor	PGE2	Platycodin D may stimulate TNF-α synthesis or inhibit degradation of TNF-α mRNA. Platycodin D (10/30 μM) suppresses prostaglandin E2 production in rat peritoneal macrophages stimulated by the protein kinase C activator 12-O-tetradecanoyl phorbol 13-acetate (TPA). Platycodin D and D3 are useful as expectorant agents in the treatment of various airway diseases, they can increase mucin release from …	Kwon OG,ET AL. The Effects of Platycodin D, a Saponin Purified from Platycodi Radix, on Collagen-Induced DBA/1J Mouse Rheumatoid Arthritis. Evid Based Complement Alternat Med. 2014;22014:954508.
T3919	Ginsenoside Rb2	Ginsenoside C	人参皂苷Rb2	人参	小柴胡汤	11021-13-9	Triterpenoids	C\C(C)=C/CC[C@](C)(O[C@@H]1O[C@H](CO[C@@H]2OC[C@H](O)[C@H](O)[C@H]2O)[C@@H](O)[C@H](O)[C@H]1O)[C@H]1CC[C@]2(C)[C@@H]1[C@H](O)C[C@@H]1[C@@]3(C)CC[C@H](O[C@@H]4O[C@H](CO)[C@@H](O)[C@H](O)[C@H]4O[C@@H]4O[C@H](CO)[C@@H](O)[C@H](O)[C@H]4O)C(C)(C)[C@@H]3CC[C@@]21C	C53H90O22	1079.27	Others	Others inhibitor	Others	Ginsenoside Rb2 found in species of Panax, upregulating GPR120 gene expression.	Huang Q, et al. Ginsenoside-Rb2 displays anti-osteoporosis effects through reducing oxidative damage and bone-resorbing cytokines during osteogenesis. Bone. 2014 Sep;66:306-14.
T3813	Ginsenoside Rh2	(20R)Ginsenoside Rh2;20(R)-Ginsenoside Rh2	20(R)-人参皂苷 RH2	人参	小柴胡汤	112246-15-8	Triterpenoids	C\C(C)=C/CC[C@@](C)(O)[C@H]1CC[C@]2(C)[C@@H]1[C@H](O)C[C@@H]1[C@@]3(C)CC[C@H](O[C@@H]4O[C@H](CO)[C@@H](O)[C@H](O)[C@H]4O)C(C)(C)[C@@H]3CC[C@@]21C	C36H62O8	622.88	Proteases/Proteasome	MMP inhibitor	MMP	Ginsenoside Rh2 is a minor stereoisomer of ginsenoside Rh2, possesses matrix metalloproteinase inhibitory.	Choi WY,et al. Anti-inflammatory, antioxidative and matrix metalloproteinase inhibitory properties of 20(R)-ginsenoside Rh2 in cultured macrophages and keratinocytes. J Pharm Pharmacol. 2013 Feb;65(2):310-6.
T4S2299	Genipin 1-β-D-gentiobioside	Genipin 1-gentiobioside;Genipin 1-β-gentiobioside;Genipin gentiobioside;genipin-1-b-D-gentiobioside	京尼平-1-Β-D-龙胆双糖苷	栀子	热毒宁注射液；醒脑静注射液	29307-60-6	Iridoids	COC(C([C@@H]1[C@H]2C(CO)=CC1)=CO[C@H]2O[C@@H]([C@@H]([C@H]1O)O)O[C@H](CO[C@@H]([C@@H]([C@H]2O)O)O[C@H](CO)[C@H]2O)[C@H]1O)=O	C23H34O15	550.5	oxidation-reduction	Antioxidant	Antioxidant		Zhu H, et al. Simultaneous determination of two iridoid glycosides, two anthraquinones and four flavonoid glycosides of Zhi-Zi-Da-Huang decoction in rat plasma by UFLC-MS/MS: application to a comparative pharmacokinetic study in normal and cholestatic liver injury rats. J Chromatogr B Analyt Technol Biomed Life Sci. 2014 Jun 1;960:116-25.
T6S1418	Praeruptorin C		白花前胡丙素	前胡	透解祛瘟颗粒	72463-77-5	Coumarins	C\C=C(\C)C(=O)O[C@@H]1[C@H](OC(=O)CC(C)C)c2c(OC1(C)C)ccc1ccc(=O)oc21	C24H28O7	428.48	oxidation-reduction	Antioxidant	Antioxidant	1. Praeruptorin C has been widely used as an antioxidant and a calcium antagonist to treat diseases. 2. Praeruptorin C partially protects cortical neurons by inhibiting the expression of GluN2B-containing NMDA receptors and regulating the Bcl-2 family. 3. Praeruptorin C can reduce vascular hypertrophy in isolated rat hypertrophied smooth muscle cells, and this is associated with improvement of sm…	Yang L , Li X B , Yang Q , et al. The neuroprotective effect of praeruptorin C against NMDA-induced apoptosis through down-regulating of GluN2B-containing NMDA receptors[J]. Toxicology in Vitro, 2013, 27(2):908-914.
T4S1419	Praeruptorin A	(-)-Praeruptorin A	白花前胡甲素	前胡	透解祛瘟颗粒	73069-25-7	Coumarins	C\C=C(\C)C(=O)OC1C(OC(C)=O)c2c(OC1(C)C)ccc1ccc(=O)oc21	C21H22O7	386.4	MAPK;PI3K/Akt/mTOR signaling	p38 MAPK;Akt	p38;Akt	1. Praeruptorin A could exhibit its anti-osteoclastogenic activity by inhibiting p38/Akt-c-Fos-NFATc1 signaling and PLCγ-independent Ca(2+) oscillation 2. Praeruptorin A has the potential to inhibit migration/fusion of preosteoclasts in vitro and bone erosion in vivo by targeting calmodulin and inhibiting the Ca(2+)/calmodulin-CaMKIV-CREB-NFATc1 and/or Ca(2+)/calmodulin-calcineurin-NFATc1 signali…	Jeongtae Y , Sikwon C , Jun R B , et al. Praeruptorin A inhibits in vitro migration of preosteoclasts and in vivo bone erosion, possibly due to its potential to target calmodulin.[J]. Journal of Natural Products, 2015, 78(4):776-82.
T3830	20R-Ginsenoside Rg2		20R-人参皂苷Rg2	人参	小柴胡汤	80952-72-3	Triterpenoids	C[C@@H]1O[C@@H](O[C@@H]2[C@@H](O)[C@H](O)[C@@H](CO)O[C@H]2O[C@H]2C[C@]3(C)[C@H](C[C@@H](O)[C@@H]4[C@H](CC[C@@]34C)[C@](C)(O)CC\C=C(/C)C)[C@@]3(C)CC[C@H](O)C(C)(C)[C@H]23)[C@H](O)[C@H](O)[C@H]1O	C42H72O13	785.03	Immunology/Inflammation	IL Receptor inhibitor	IL-1α	20R-Ginsenoside Rg2 is a compound with anti-oxidant and anti-apoptosis.	Zhang YW, et al. Effects of ginsenosides from Panax ginseng on cell-to-cell communication function mediated by gap junctions. Planta Med. 2001 Jul;67(5):417-22.
T3843	Pinosylvin	3,5-stilbenediol;5-Styrylresorcinol	银松素	虎杖	清肺达原颗粒（肺炎1号）	22139-77-1	Phenols	c1ccc(cc1)/C=C/c1cc(cc(c1)O)O	C14H12O2	212.25	Others	Others	Others	Pinosylvin induces autophagy via AMPK activation. Pinosylvin is likely to act as a pro-angiogenic factor.	Park J, et al. Pinosylvin at a high concentration induces AMPK-mediated autophagy for preventing necrosis in bovine aortic endothelial cells. Can J Physiol Pharmacol. 2014 Dec;92(12):993-9.
T3791	Atractyloside A		苍术苷 A	白术	清肺排毒汤	126054-77-1	Sesquiterpenoids	CC(C)(O[C@@H]1O[C@H](CO)[C@@H](O)[C@H](O)[C@H]1O)[C@@H]1CC[C@](O)(CO)[C@H]2CC(=O)[C@@](C)(O)[C@@H]2C1	C21H36O10	448.5	Neuroscience	AChR modulator	adenine nucleotide translocase	Atractyloside is a glycoside of a kaurene type diterpene that is found in some plants including Atractylis gummifera (ATRACTYLIS); COFFEE; XANTHIUM, and CALLILEPIS. Toxicity is due to inhibition of adenine nucleotide translocase.	Todisco S, et al. Identification of new highly selective inhibitors of the human ADP/ATP carriers by molecular docking and in vitro transport assays. Biochem Pharmacol. 2016 Jan 15;100:112-32.
T5S2207	7-O-Methylmangiferin		7-O-甲基芒果素	知母	清肺达原颗粒（肺炎1号）	31002-12-7	Xanthones	COc1cc2c(cc1O)oc1cc(O)c([C@@H]3O[C@H](CO)[C@@H](O)[C@H](O)[C@H]3O)c(O)c1c2=O	C20H20O11	436.36	Others	Others	Others	7-O-MethylMangiferin is an xanthone isolated from the rhizomes of Iris nigricans.	Al-Khalil, S., et al.: Phytochem., 38, 729-731 (1995)
T3891	Oroxylin A 7-O-beta-D-glucuronide	Oroxylin A Glucoronide;Oroxyloside	千层纸素A-7-0-Β-D-葡萄糖醛酸苷	黄芩	痰热清注射液；小柴胡汤；清肺达原颗粒（肺炎1号）；清肺排毒汤；透解祛瘟颗粒；金花清感颗粒	36948-76-2	Flavonoid	COC1=C(C=C2C(=C1O)C(=O)C=C(O2)C3=CC=CC=C3)O[C@H]4[C@@H]([C@H]([C@@H]([C@H](O4)C(=O)O)O)O)O	C22H20O11	460.39	Others	Others	Others	Oroxylin A-7-O-glucuronide and wogonoside should also be served as the chemical markers together with baicalin for the quality control of herbs and proprietary traditional Chinese medicine (PTCM) products of radix Scutellariae. Oroxylin A 7-O-glucuronide, Oroxin A, and Oroxin B can bind to the “stem” region of α-hemolysin (α-HL), when inhibiting the hemolytic activity of α-HL. Oroxylin A 7-O-gluc…	Zhou XQ., et al. Flavonoids from Scutellaria baicalensis and their bioactivities.
T7025	Rehmannioside D		地黄甙 D	玄参	透解祛瘟颗粒	81720-08-3	Iridoids	OC[C@H]([C@H]([C@@H]([C@H]1O)O)O)O[C@H]1O[C@@H]([C@@H]1C(CO)=C[C@H]2O)OC=C[C@@]12O[C@@H]([C@@H]([C@H]1O)O[C@@H]([C@@H]([C@H]2O)O)O[C@H](CO)[C@H]2O)O[C@H](CO)[C@H]1O	C27H42O20	686.61	Others	Others	Others	Rehmannioside D is a carotenoid glycoside that existed in the roots of Rehmannia glutinosa.	NA
T7557	Guvacine hydrochloride		去甲槟榔次碱	槟榔	清肺达原颗粒（肺炎1号）	6027-91-4	Others	Cl.O=C(O)C1=CCCNC1	C6H10ClNO2	163.6	Membrane transporter/Ion channel;Neuroscience	GABA Receptor	GABA	Guvacine hydrochloride is an inhibits of GABA uptake (IC50 : 10 μM)	Johnston G A R , Krogsgaard-Larsen P , Stephanson A . Betel nut constituents as inhibitors of γ-aminobutyric acid uptake[J]. Nature.
T8017	Methylnonylketone	2-Undecanone	甲基壬基甲酮	鱼腥草	连花清瘟胶囊	112-12-9	Miscellaneous	CCCCCCCCCC(C)=O	C11H22O	170.29	Others	Others	Others	Methylnonylketone is a natural non-toxic insect repellant compound.	Fischer D , Imholt C , Prokop A , et al. Efficacy of methyl nonyl ketone as an in-soil repellent for common voles (Microtus arvalis)[J]. Pest Management Science, 2013, 69(3).
T8169	Decursinol		日本前胡醇	前胡	透解祛瘟颗粒	23458-02-8	Coumarins	CC1(C)Oc2cc(OC(C=C3)=O)c3cc2C[C@@H]1O	C14H14O4	246.26	Others	Others	Others	Decursinol is isolated from the roots of Angelica Gigas with an antinociceptive effect. It also has anti-tumor and anti-metastasis activity.	Choi SS, et al. Antinociceptive mechanisms of orally administered decursinol in the mouse. Life Sci. 2003 Jun 13;73(4):471-85.
T8205	Norwogonin	5,7,8-Trihydroxyflavone	去甲汉黄芩素	黄芩	痰热清注射液；小柴胡汤；清肺达原颗粒（肺炎1号）；清肺排毒汤；透解祛瘟颗粒；金花清感颗粒	4443-09-8	Flavonoids	Oc(c1c2OC(c3ccccc3)=CC1=O)cc(O)c2O	C15H10O5	270.24	Anti-infection	Enterovirus	EV71	Norwogonin, isolated from Scutellaria baicalensis Georgi, possesses antiviral activity against Enterovirus 71 (IC50: 31.83 μg/ml).	Choi HJ, et al. Inhibitory Effects of Norwogonin, Oroxylin A, and Mosloflavone on Enterovirus 71. Biomol Ther (Seoul). 2016 Sep 1;24(5):552-8.
T6S1880	Benzoylaconitine_x000D_	Isaconitine;Pikraconitin	苯甲酰乌头原碱	附子	参附注射液	466-24-0	Alkaloids	CCN1C[C@@]2([C@@H](C[C@@H]([C@@]34[C@@H]2[C@H]([C@@H](C31)[C@@]5([C@@H]6[C@H]4C[C@@]([C@@H]6OC(=O)C7=CC=CC=C7)([C@H]([C@@H]5O)OC)O)O)OC)OC)O)COC	C32H45NO10	603.70	Others	Others	Others	Benzoylaconine is an alkaloid in the Chinese traditional medicine Radix Aconiti Lateralis Preparata (Fuzi). Benzoylaconine and aconitine can induce reproductive toxicity in BeWo Cell, the amino acid metabolism was the main metabolic pathway and responsible for the placental and fetal toxicity of them.	Liu XX, et al. Determination of alkaloids in Radix Aconiti Lateralis Preparata by RP-ion-pair HPLC. Yao Xue Xue Bao. 2006 Apr;41(4):365-9.
T8152	6-Demethoxytangeretin		6-去甲氧基三苯甲基黄嘌呤	枳实	清肺排毒汤	6601-66-7	Flavonoids	COc(cc1)ccc1C(Oc1c2c(OC)cc(OC)c1OC)=CC2=O	C19H18O6	342.3	Angiogenesis; Tyrosine Kinase/Adaptors; MAPK	ALK; MAPK	ALK; MAPK	6-Demethoxytangeretin is a citrus flavonoid isolated from Citrus depressa.	Kim YM, et al. A citrus flavonoid, 6-demethoxytangeretin, suppresses production and gene expression of interleukin-6 in human mast cell-1 via anaplastic lymphoma kinase and mitogen-activated protein kinase pathways. Biol Pharm Bull. 2014;37(5):871-6. Epub 2014 Feb 5.
T8024	3-Indoleacetonitrile		吲哚-3-乙腈	板蓝根	连花清瘟胶囊	771-51-7	Others	N#CCc1c[nH]c2c1cccc2	C10H8N2	156.18	Others	Others	Others	3-Indoleacetonitrile is a light-induced auxin-inhibitory substance that is isolated from light-grown cabbage shoots.	Mahadevan S . Conversion of 3-indoleacetaldoxime to 3-indoleacetonitrile by plants[J]. Archives of Biochemistry & Biophysics, 1963, 100(3):557-558.
T8170	Carboxyatractyloside tripotassium salt	Carboxyatractyloside;Gummiferin	羧基苍术苷	苍术	透解祛瘟颗粒	77228-71-8	Diterpenoids	[H][C@@]12CC[C@@H]3C[C@@]1(CC[C@@]1([H])[C@@]2(C)C[C@@H](CC1(C(O)=O)C(O)=O)O[C@@H]1O[C@H](CO)[C@@H](OS(O)(=O)=O)[C@H](OS(O)(=O)=O)[C@H]1OC(=O)CC(C)C)[C@@H](O)C3=C	C31H46O18S2	770.8	Others	Others	Others	Carboxyatractyloside is a natural product. It acts as an inhibitor of ADP/ATP carrier, inhibits mitochondrial ADP/ATP transport.	Pebay-Peyroula E, et al. Structure of mitochondrial ADP/ATP carrier in complex with carboxyatractyloside. Nature. 2003 Nov 6;426(6962):39-44.
T8159	Senkyunolide H		洋川芎内酯H	川芎	血必净注射液	94596-27-7	Miscellaneous	CCC/C=C(/C(CC[C@H]1O)=C2[C@@H]1O)\OC2=O	C12H16O4	224.25	Others	Others	Others	Senkyunolide H is a natural compound found in Ligusticum chuanxiong Hort.	Yan R, et al. Simultaneous quantification of 12 bioactive components of Ligusticum chuanxiong Hort. by high-performance liquid chromatography. J Pharm Biomed Anal. 2005 Feb 7;37(1):87-95.
